# Supplementary material for: Integrating real-time data analysis into automatic tracking of social insect behavior
Source: bioRxiv preprint, doi:10.1101/2020.11.03.366195, version 1 (2020-11-03)
Supplement: Data [file 366195_file02.csv]

video	area	lighting	condition	frame	upsidedown	double	double_plus_one	setup_wall	special_cases	system_id	human_id	track_id	clarity1	tilt1	x	y	human_shape	computer_shape	human-code	computer_code	human_identity	computer_identity	human_whole	human_accuracy	computer_accuracy	distance_new	distmm_new
FI1	foraging	infrared	foraginginfrared	60		1				-1	0	0	a1	b1	1638.582642	1910.136841	1	1	1	0	0		0	1		0	0
FI1	foraging	infrared	foraginginfrared	70		1				-1	0	0	a1	b1	1638.040039	1911.65625	1	1	1	0	0		0	1		1.613388275	0.11524202
FI1	foraging	infrared	foraginginfrared	80		1				-1	0	0	a	b1	1638.189209	1911.305176	1	1	1	0	0		0	1		0.381450708	0.027246479
FI1	foraging	infrared	foraginginfrared	90		1				-1	0	0	a1	b	1639.082397	1909.344727	1	1	1	0	0		0	1		2.154331703	0.153880836
FI1	foraging	infrared	foraginginfrared	100		1				-1	0	0	a1	b1	1642.429932	1912.050415	1	1	1	0	0		0	1		4.304269756	0.30744784
FI1	foraging	infrared	foraginginfrared	110		1				-1	0	0	a	b	1635.883667	1909.674927	1	1	1	0	0		0	1		6.963944908	0.497424636
FI1	foraging	infrared	foraginginfrared	120		1					0	0	a1	b	1662	1929	1	0	1	0	0		0	1		32.48878723	2.320627659
FI1	foraging	infrared	foraginginfrared	130		1					0	0	a2	b1	1665	1938	1	0	1	0	0		0	1		9.486832981	0.677630927
FI1	foraging	infrared	foraginginfrared	140					c2	-1	0	0	a	b	1676.028076	1940.944336	1	1	1	0	0		0	1		11.41435827	0.815311305
FI1	foraging	infrared	foraginginfrared	150					c2	-1	0	0	a	b	1672.036987	1939.062256	1	1	1	0	0		0	1		4.412597481	0.315185534
FI1	foraging	infrared	foraginginfrared	160						-1	0	0	a1	b	1670.245972	1944.165771	1	1	1	0	0		0	1		5.408659731	0.386332838
FI1	foraging	infrared	foraginginfrared	170					c2	-1	0	0	a	b	1669.992676	1943.72937	1	1	1	0	0		0	1		0.504583686	0.036041692
FI1	foraging	infrared	foraginginfrared	180						-1	0	0	a1	b	1671.518677	1947.925415	1	1	1	0	0		0	1		4.464915754	0.318922554
FI1	foraging	infrared	foraginginfrared	190						-1	0	0	a1	b	1677.696899	1962.383911	1	1	1	0	0		0	1		15.72318459	1.123084614
FI1	foraging	infrared	foraginginfrared	200						-1	0	0	a	b	1672.429077	1943.648926	1	1	1	0	0		0	1		19.46149048	1.390106463
FI1	foraging	infrared	foraginginfrared	210		1			c2	-1	20	0	a	b2	1668.052002	1935.342529	1	1	0	0						9.389090301	0.670649307
FI1	foraging	infrared	foraginginfrared	220		1			c2	-1	0	0	a	b	1668.675781	1936.38208	1	1	1	0	0		0	1		1.212339277	0.086595663
FI1	foraging	infrared	foraginginfrared	230		1			c2		0	0	a	b	1661	1962	1	0	1	0	0		0	1		26.74313817	1.910224155
FI1	foraging	infrared	foraginginfrared	240		1			c2		0	0	a	b	1668	1971	1	0	1	0	0		0	1		11.40175425	0.814411018
FI1	foraging	infrared	foraginginfrared	60		2					2	2	a	b	1665	1689	1	0	1	0	2		2	1		0	0
FI1	foraging	infrared	foraginginfrared	70		2				2	2	2	a	b	1693.498047	1716.10791	1	1	1	1	2	2	2	1	1	39.33163444	2.80940246
FI1	foraging	infrared	foraginginfrared	80			2			2	2	2	a	b	1692.471924	1715.371826	1	1	1	1	2	2	2	1	1	1.262833349	0.090202382
FI1	foraging	infrared	foraginginfrared	90		2				2	2	2	a	b	1690.953003	1717.119385	1	1	1	1	2	2	2	1	1	2.315401361	0.165385812
FI1	foraging	infrared	foraginginfrared	100			2			2	2	2	a	b	1694.937988	1718.881226	1	1	1	1	2	2	2	1	1	4.357084938	0.311220353
FI1	foraging	infrared	foraginginfrared	110						2	2	2	a	b	1660.705444	1680.55481	1	1	1	1	2	2	2	1	1	51.38853211	3.670609436
FI1	foraging	infrared	foraginginfrared	120		2				2	2	2	a	b	1690.190063	1713.799316	1	1	1	1	2	2	2	1	1	44.43579567	3.173985405
FI1	foraging	infrared	foraginginfrared	130							2	2	a	b	1662	1686	1	0	1	0	2		2	1		39.59143369	2.82795955
FI1	foraging	infrared	foraginginfrared	140			2			-1	2	2	a	b	1690.451782	1719.449829	1	0	1	0	2		2	1		43.91349404	3.136678146
FI1	foraging	infrared	foraginginfrared	150			2			-1	2	2	a	b	1691.97229	1715.653198	1	1	1	0	2		2	1		4.089786245	0.292127589
FI1	foraging	infrared	foraginginfrared	160		2					2	2	a	b	1677	1683	1	0	1	0	2		2	1		35.92214926	2.565867804
FI1	foraging	infrared	foraginginfrared	170		2				-1	2	2	a	b	1692.082764	1717.203857	1	1	1	0	2		2	1		37.3817282	2.670123443
FI1	foraging	infrared	foraginginfrared	180			2			2	2	2	a	b	1690.020508	1715.010742	1	1	1	1	2	2	2	1	1	3.010424092	0.215030292
FI1	foraging	infrared	foraginginfrared	190		2				2	2	2	a	b	1691.858521	1715.378906	1	1	1	1	2	2	2	1	1	1.874523011	0.133894501
FI1	foraging	infrared	foraginginfrared	200		2				2	2	2	a	b	1693.499268	1716.297119	1	1	1	1	2	2	2	1	1	1.880203668	0.134300262
FI1	foraging	infrared	foraginginfrared	210		2				2	2	2	a	b	1692.873779	1716.073975	1	1	1	1	2	2	2	1	1	0.664100696	0.047435764
FI1	foraging	infrared	foraginginfrared	220		2				2	2	2	a	b	1693.753296	1715.414673	1	1	1	1	2	2	2	1	1	1.099194833	0.078513917
FI1	foraging	infrared	foraginginfrared	230			2			2	2	2	a	b	1690.576904	1715.137085	1	1	1	1	2	2	2	1	1	3.188498273	0.227749877
FI1	foraging	infrared	foraginginfrared	240						2	2	2	a	b	1693.005371	1716.538452	1	1	1	1	2	2	2	1	1	2.803797681	0.200271263
FI1	foraging	infrared	foraginginfrared	60						-1	20	4	a2	b	2418.077148	751.4492798	1	1	0	0						0	0
FI1	foraging	infrared	foraginginfrared	70					c5	-1	20	4	a2	b1	2296.594238	669.9161377	1	1	0	0						146.3070425	10.45050304
FI1	foraging	infrared	foraginginfrared	80						4	20	4	a2	b1	2222.258057	599.7920532	1	1	0	1		4	4	0	1	102.1922455	7.299446104
FI1	foraging	infrared	foraginginfrared	90						4	4	4	a	b	2185.77832	463.5252686	1	1	1	1	4	4	4	1	1	141.0652608	10.07609006
FI1	foraging	infrared	foraginginfrared	100						-1	4	4	a	b1	2133.240723	462.4783325	1	1	1	1	4	4	4	1	1	52.54802731	3.753430522
FI1	foraging	infrared	foraginginfrared	110					c5	4	20	4	a2	b1	2014.224854	484.0702209	1	1	0	1		4	4	0	1	120.9586157	8.639901123
FI1	foraging	infrared	foraginginfrared	120						4	20	4	a2	b1	1872.436646	514.2645874	1	1	0	1		4	4	0	1	144.9675677	10.35482627
FI1	foraging	infrared	foraginginfrared	130						4	4	4	a2	b	1720.289429	452.2913208	1	1	1	1	4	4	4	1	1	164.2846962	11.73462116
FI1	foraging	infrared	foraginginfrared	140						4	20	4	a2	b1	1626.432007	432.2368469	1	1	0	1		4	4	0	1	95.97602611	6.855430436
FI1	foraging	infrared	foraginginfrared	150						4	20	4	a2	b	1507.892334	514.5460205	1	1	0	1		4	4	0	1	144.3137351	10.30812393
FI1	foraging	infrared	foraginginfrared	160						4	20	4	a2	b2	1465.485107	661.5861206	1	1	0	1		4	4	0	1	153.0332119	10.93094371
FI1	foraging	infrared	foraginginfrared	170						4	20	4	a2	b	1349.516602	681.5415039	1	1	0	1		4	4	0	1	117.6729003	8.405207167
FI1	foraging	infrared	foraginginfrared	180						4	4	4	a1	b	1254.625732	693.2932739	1	1	1	1	4	4	4	1	1	95.61580051	6.829700037
FI1	foraging	infrared	foraginginfrared	190							4	4	a	b	1239	687	1	0	1	0	4		4	1		16.84543846	1.203245604
FI1	foraging	infrared	foraginginfrared	200		3				4	4	4	a	b1	1254	699	1	1	1	1	4	4	4	1	1	19.20937271	1.372098051
FI1	foraging	infrared	foraginginfrared	210		3				4	4	4	a1	b1	1254	699	1	1	1	1	4	4	4	1	1	0	0
FI1	foraging	infrared	foraginginfrared	220		3				4	4	4	a1	b1	1254	699	1	1	1	1	4	4	4	1	1	0	0
FI1	foraging	infrared	foraginginfrared	230		3				4	4	4	a1	b1	1254	699	1	1	1	1	4	4	4	1	1	0	0
FI1	foraging	infrared	foraginginfrared	240		3				4	4	4	a1	b1	1254	699	1	1	1	1	4	4	4	1	1	0	0
FI1	foraging	infrared	foraginginfrared	60						-1	20	5	a2	b1	1289.510498	1897.469849	1	1	0	0						0	0
FI1	foraging	infrared	foraginginfrared	70						-1	20	5	a2	b1	1290.756104	1898.325806	1	1	0	0						1.511355912	0.107953994
FI1	foraging	infrared	foraginginfrared	80						-1	20	5	a2	b1	1293.787231	1902.867432	1	1	0	0						5.460228714	0.390016337
FI1	foraging	infrared	foraginginfrared	90						-1	20	5	a2	b1	1294.310059	1899.081543	1	1	0	0						3.821819545	0.27298711
FI1	foraging	infrared	foraginginfrared	100						4	20	5	a1	b2	1287.973999	1895.535034	1	1	0	0						7.261086862	0.518649062
FI1	foraging	infrared	foraginginfrared	110						-1	20	5	a2	b1	1287.689819	1884.702881	1	1	0	0						10.83588007	0.773991434
FI1	foraging	infrared	foraginginfrared	120						-1	20	5	a2	b1	1289.554443	1884.427612	1	1	0	0						1.884833065	0.134630933
FI1	foraging	infrared	foraginginfrared	130						-1	20	5	a2	b2	1289.076172	1895.333374	1	1	0	0						10.91624422	0.77973173
FI1	foraging	infrared	foraginginfrared	140						-1	20	5	a2	b2	1292.127075	1882.828125	1	1	0	0						12.87203409	0.919431007
FI1	foraging	infrared	foraginginfrared	150						-1	20	5	a2	b2	1293.051758	1882.667114	1	1	0	0						0.938596395	0.0670426
FI1	foraging	infrared	foraginginfrared	160						-1	20	5	a2	b2	1292.092773	1882.260864	1	1	0	0						1.041485138	0.074391796
FI1	foraging	infrared	foraginginfrared	170						-1	20	5	a2	b2	1289.795654	1883.002686	1	1	0	0						2.413929489	0.172423535
FI1	foraging	infrared	foraginginfrared	180						-1	20	5	a2	b1	1289.126221	1895.850708	1	1	0	0						12.86545024	0.918960731
FI1	foraging	infrared	foraginginfrared	190						-1	20	5	a2	b1	1289.914917	1885.159668	1	1	0	0						10.72009224	0.765720874
FI1	foraging	infrared	foraginginfrared	200						-1	20	5	a2	b2	1291.910767	1883.928955	1	1	0	0						2.344796731	0.167485481
FI1	foraging	infrared	foraginginfrared	210						-1	20	5	a2	b2	1290.237671	1883.344482	1	1	0	0						1.772246854	0.126589061
FI1	foraging	infrared	foraginginfrared	220						-1	20	5	a2	b2	1292.191406	1895.631226	1	1	0	0						12.44110761	0.888650544
FI1	foraging	infrared	foraginginfrared	230					c4	-1	20	5	a1	b2	1295.614746	1880.904175	1	1	0	0						15.11969867	1.079978477
FI1	foraging	infrared	foraginginfrared	240						-1	20	5	a2	b2	1289.631836	1883.333496	1	1	0	0						6.457306915	0.461236208
FI1	foraging	infrared	foraginginfrared	60						-1	20	6	a2	b	2335.917725	1914.318604	1	1	0	0						0	0
FI1	foraging	infrared	foraginginfrared	70						-1	6	6	a1	b1	2382.052979	1934.968384	1	1	1	0	6		6	1		50.54577209	3.610412292
FI1	foraging	infrared	foraginginfrared	80						-1	6	6	a1	b1	2346.526611	1928.859985	1	1	1	0	6		6	1		36.04768178	2.574834413
FI1	foraging	infrared	foraginginfrared	90						-1	20	6	a2	b1	2220.376221	1797.067261	1	1	0	0						182.4369562	13.03121116
FI1	foraging	infrared	foraginginfrared	100						-1	20	6	a2	b1	1968	1677	1	0	0	0						279.4814915	19.96296368
FI1	foraging	infrared	foraginginfrared	110						6	6	6	a	b1	1772.03894	1676.702759	1	1	1	1	6	6	6	1	1	195.9612854	13.99723467
FI1	foraging	infrared	foraginginfrared	120						6	6	6	a1	b1	1756.314697	1636.214722	1	1	1	1	6	6	6	1	1	43.43423716	3.102445512
FI1	foraging	infrared	foraginginfrared	130						6	6	6	a	b	1698.556641	1608.958008	1	1	1	1	6	6	6	1	1	63.86643478	4.561888198
FI1	foraging	infrared	foraginginfrared	140						6	20	6	a2	b1	1658.68042	1579.340088	1	1	0	1		6	6	0	1	49.67226778	3.548019127
FI1	foraging	infrared	foraginginfrared	150						6	6	6	a2	b	1493.983398	1562.685669	1	1	1	1	6	6	6	1	1	165.5369407	11.82406719
FI1	foraging	infrared	foraginginfrared	160						6	6	6	a1	b	1349.707031	1739.175659	1	1	1	1	6	6	6	1	1	227.9569842	16.28264173
FI1	foraging	infrared	foraginginfrared	170						6	6	6	a	b	1324.346802	1767.480469	1	1	1	1	6	6	6	1	1	38.003993	2.714570929
FI1	foraging	infrared	foraginginfrared	180					c5	6	20	6	a2	b	1110.897095	1797.278564	1	1	0	1		6	6	0	1	215.5196137	15.39425812
FI1	foraging	infrared	foraginginfrared	190						6	6	6	a2	b	991.4544678	1894.490356	1	1	1	1	6	6	6	1	1	154.0021873	11.00015624
FI1	foraging	infrared	foraginginfrared	200					c5	6	20	6	a2	b1	909.9503174	1877.194946	1	1	0	1		6	6	0	1	83.31901187	5.951357991
FI1	foraging	infrared	foraginginfrared	210						6	20	6	a2	b	889.3826904	1936.894287	1	1	0	1		6	6	0	1	63.14300117	4.510214369
FI1	foraging	infrared	foraginginfrared	220					c5	6	20	6	a2	b1	1046.519287	1972.783203	1	1	0	1		6	6	0	1	161.1828908	11.51306363
FI1	foraging	infrared	foraginginfrared	230						6	20	6	a2	b1	1162.591675	1972.606934	1	1	0	1		6	6	0	1	116.0725218	8.290894417
FI1	foraging	infrared	foraginginfrared	240					c5	6	20	6	a2	b1	1459.936768	1969.536621	1	1	0	1		6	6	0	1	297.3609442	21.24006744
FI1	foraging	infrared	foraginginfrared	60		2				-1	7	7	a1	b1	1693.824707	1716.347778	1	1	1	0	7		7	1		0	0
FI1	foraging	infrared	foraginginfrared	70		2					7	7	a1	b1	1719	1767	1	0	1	0	7		7	1		56.56361879	4.040258485
FI1	foraging	infrared	foraginginfrared	80			2			-1	7	7	a	b1	1716.994385	1769.917603	1	1	1	0	7		7	1		3.540465901	0.252890421
FI1	foraging	infrared	foraginginfrared	90		2				-1	7	7	a	b1	1716	1770	1	0	1	0	7		7	1		0.997792961	0.071270926
FI1	foraging	infrared	foraginginfrared	100			2			-1	7	7	a	b1	1717.66748	1769.661011	1	1	1	0	7		7	1		1.701588403	0.121542029
FI1	foraging	infrared	foraginginfrared	110						-1	7	7	a	b1	1717.15271	1772.295776	1	1	1	0	7		7	1		2.684580928	0.191755781
FI1	foraging	infrared	foraginginfrared	120		2					7	7	a1	b1	1725	1764	1	0	1	0	7		7	1		11.4192758	0.815662557
FI1	foraging	infrared	foraginginfrared	130						-1	7	7	a	b1	1716.053223	1767.505249	1	1	1	0	7		7	1		9.608932784	0.686352342
FI1	foraging	infrared	foraginginfrared	140			2			-1	7	7	a	b1	1718.435059	1767.901367	1	1	1	0	7		7	1		2.414550103	0.172467865
FI1	foraging	infrared	foraginginfrared	150			2			-1	7	7	a	b1	1716.909058	1767.998535	1	1	1	0	7		7	1		1.529091453	0.109220818
FI1	foraging	infrared	foraginginfrared	160		2				-1	7	7	a	b1	1692.138794	1717.607056	1	1	1	0	7		7	1		56.15039746	4.010742675
FI1	foraging	infrared	foraginginfrared	170		2					7	7	a	b1	1713	1770	1	0	1	0	7		7	1		56.39335508	4.028096791
FI1	foraging	infrared	foraginginfrared	180			2			-1	7	7	a	b1	1716.851318	1769.80481	1	1	1	0	7		7	1		3.856261074	0.27544722
FI1	foraging	infrared	foraginginfrared	190		2					7	7	a	b1	1716	1776	1	0	1	0	7		7	1		6.253408788	0.446672056
FI1	foraging	infrared	foraginginfrared	200		2					7	7	a	b1	1725	1767	1	0	1	0	7		7	1		12.72792206	0.90913729
FI1	foraging	infrared	foraginginfrared	210		2					7	7	a	b1	1713	1770	1	0	1	0	7		7	1		12.36931688	0.883522634
FI1	foraging	infrared	foraginginfrared	220		2					7	7	a	b1	1725	1770	1	0	1	0	7		7	1		12	0.857142857
FI1	foraging	infrared	foraginginfrared	230			2			-1	7	7	a	b1	1716.235474	1769.303833	1	1	1	0	7		7	1		8.792130828	0.628009345
FI1	foraging	infrared	foraginginfrared	240							7	7	a	b1	1731	1776	1	0	1	0	7		7	1		16.21202888	1.158002063
FI1	foraging	infrared	foraginginfrared	60						-1	20	8	a2	b1	3132.263672	1635.575439	1	1	0	0						0	0
FI1	foraging	infrared	foraginginfrared	70						-1	8	8	a1	b1	3132.147461	1763.80896	1	1	1	0	8		8	1		128.2335737	9.159540976
FI1	foraging	infrared	foraginginfrared	80						-1	20	8	a2	b	3140.378662	1658.128906	1	1	0	0						106.0001249	7.571437494
FI1	foraging	infrared	foraginginfrared	90						-1	8	8	a1	b1	3143.958252	1464.040894	1	1	1	0	8		8	1		194.1210186	13.86578704
FI1	foraging	infrared	foraginginfrared	100						-1	20	8	a2	b	3106.022949	1260.403687	1	1	0	0						207.1405303	14.79575216
FI1	foraging	infrared	foraginginfrared	110						-1	8	8	a2	b	3125.306152	1051.903687	1	1	1	0	8		8	1		209.3898085	14.9564149
FI1	foraging	infrared	foraginginfrared	120						-1	8	8	a1	b1	3140.129395	972.3062744	1	1	1	0	8		8	1		80.96589792	5.783278423
FI1	foraging	infrared	foraginginfrared	130						-1	8	8	a	b1	3132.648682	971.5543213	1	1	1	0	8		8	1		7.518410766	0.53702934
FI1	foraging	infrared	foraginginfrared	140						-1	8	8	a	b	3132.308838	970.4078979	1	1	1	0	8		8	1		1.195734317	0.085409594
FI1	foraging	infrared	foraginginfrared	150						-1	8	8	a	b	3131.642822	970.8299561	1	1	1	0	8		8	1		0.788486168	0.056320441
FI1	foraging	infrared	foraginginfrared	160						-1	8	8	a	b	3131.525635	970.4085693	1	1	1	0	8		8	1		0.43737813	0.031241295
FI1	foraging	infrared	foraginginfrared	170						-1	8	8	a	b	3130.876953	970.5509644	1	1	1	0	8		8	1		0.664127022	0.047437644
FI1	foraging	infrared	foraginginfrared	180						-1	8	8	a	b	3130.322998	971.1294556	1	1	1	0	8		8	1		0.800948319	0.057210594
FI1	foraging	infrared	foraginginfrared	190						-1	8	8	a	b	3128.92041	972.7115479	1	1	1	0	8		8	1		2.1143011	0.151021507
FI1	foraging	infrared	foraginginfrared	200						-1	8	8	a	b	3128.796387	970.4929199	1	1	1	0	8		8	1		2.222091786	0.158720842
FI1	foraging	infrared	foraginginfrared	210						-1	8	8	a	b	3122.767822	965.4492188	1	1	1	0	8		8	1		7.860185541	0.561441824
FI1	foraging	infrared	foraginginfrared	220						-1	8	8	a	b1	3125.708008	971.7658691	1	1	1	0	8		8	1		6.967407317	0.497671951
FI1	foraging	infrared	foraginginfrared	230						-1	8	8	a	b	3129.569824	968.9841919	1	1	1	0	8		8	1		4.759343533	0.339953109
FI1	foraging	infrared	foraginginfrared	240						-1	8	8	a	b	3119.326904	965.2481689	1	1	1	0	8		8	1		10.90299399	0.778785285
FI1	foraging	infrared	foraginginfrared	60						-1	20	9	a2	b	2807.548828	1298.006226	1	1	0	0						0	0
FI1	foraging	infrared	foraginginfrared	70					c	-1	20	9	a	b2	2810.71875	1288.393677	1	1	0	0						10.12173423	0.722981016
FI1	foraging	infrared	foraginginfrared	80					c	-1	20	9	a	b2	2810.858887	1288.608643	1	1	0	0						0.256610132	0.018329295
FI1	foraging	infrared	foraginginfrared	90					c	-1	20	9	a	b2	2809.822998	1274.189941	1	1	0	0						14.45586502	1.032561787
FI1	foraging	infrared	foraginginfrared	100					c	-1	20	9	a1	b2	2809.30835	1270.119019	1	1	0	0						4.103324079	0.293094577
FI1	foraging	infrared	foraginginfrared	110					c	-1	20	9	a	b2	2809.601074	1269.60144	1	1	0	0						0.594622032	0.042473002
FI1	foraging	infrared	foraginginfrared	120					c	-1	20	9	a	b2	2822.003662	1272.396484	1	1	0	0						12.71363284	0.908116632
FI1	foraging	infrared	foraginginfrared	130						9	9	9	a	b1	2821.170898	1295.566528	1	1	1	1	9	9	9	1	1	23.18500453	1.656071752
FI1	foraging	infrared	foraginginfrared	140						9	9	9	a	b1	2824.491943	1305.565918	1	1	1	1	9	9	9	1	1	10.53646716	0.752604797
FI1	foraging	infrared	foraginginfrared	150						9	9	9	a	b1	2826.394775	1304.621582	1	1	1	1	9	9	9	1	1	2.124274017	0.151733858
FI1	foraging	infrared	foraginginfrared	160						9	9	9	a	b1	2829.124756	1308.755615	1	1	1	1	9	9	9	1	1	4.954091754	0.353863697
FI1	foraging	infrared	foraginginfrared	170						9	20	9	a2	b2	2824.204102	1309.271851	1	1	0	1		9	9	0	1	4.947659588	0.353404256
FI1	foraging	infrared	foraginginfrared	180						9	9	9	a1	b2	2827.949951	1310.94165	1	1	1	1	9	9	9	1	1	4.101172202	0.292940872
FI1	foraging	infrared	foraginginfrared	190						9	9	9	a1	b2	2852.208984	1331.008301	1	1	1	1	9	9	9	1	1	31.48287097	2.248776498
FI1	foraging	infrared	foraginginfrared	200					c5	9	9	9	a1	b2	2847.14502	1323.810425	1	1	1	1	9	9	9	1	1	8.800747145	0.628624796
FI1	foraging	infrared	foraginginfrared	210						9	9	9	a	b	2854.586914	1359.484497	1	1	1	1	9	9	9	1	1	36.44202518	2.603001799
FI1	foraging	infrared	foraginginfrared	220						9	9	9	a	b1	2885.844482	1378.651367	1	1	1	1	9	9	9	1	1	36.66612146	2.619008676
FI1	foraging	infrared	foraginginfrared	230						9	9	9	a	b1	2888.289551	1390.592896	1	1	1	1	9	9	9	1	1	12.18927714	0.870662653
FI1	foraging	infrared	foraginginfrared	240						9	9	9	a1	b1	2889.144287	1390.841309	1	1	1	1	9	9	9	1	1	0.890102605	0.063578758
FI1	foraging	infrared	foraginginfrared	60						-1	10	10	a1	b	904.4577637	1579.389282	1	1	1	0	10		10	1		0	0
FI1	foraging	infrared	foraginginfrared	70						-1	20	10	a2	b1	887.3500977	1533.046997	1	1	0	0						49.39918638	3.528513313
FI1	foraging	infrared	foraginginfrared	80						-1	10	10	a2	b1	877.8249512	1440.797241	1	1	1	0	10		10	1		92.74020648	6.624300463
FI1	foraging	infrared	foraginginfrared	90						-1	10	10	a2	b1	880.6726074	1358.817993	1	1	1	0	10		10	1		82.02869162	5.859192258
FI1	foraging	infrared	foraginginfrared	100						-1	10	10	a2	b2	882.2353516	1269.003784	1	1	1	0	10		10	1		89.82780365	6.416271689
FI1	foraging	infrared	foraginginfrared	110						-1	10	10	a2	b1	901.0368042	1173.792114	1	1	1	0	10		10	1		97.05027936	6.932162812
FI1	foraging	infrared	foraginginfrared	120						10	10	10	a	b1	906.9405518	1129.683228	1	1	1	1	10	10	10	1	1	44.50222534	3.178730381
FI1	foraging	infrared	foraginginfrared	130						10	10	10	a	b1	940.7513428	1071.23938	1	1	1	1	10	10	10	1	1	67.51927841	4.822805601
FI1	foraging	infrared	foraginginfrared	140					c4	10	20	10	a1	b2	978.8670654	1018.120483	1	1	0	1		10	10	0	1	65.37909091	4.669935065
FI1	foraging	infrared	foraginginfrared	150						10	10	10	a	b1	1017.938232	950.2587891	1	1	1	1	10	10	10	1	1	78.30559085	5.593256489
FI1	foraging	infrared	foraginginfrared	160						10	20	10	a2	b1	1074.184448	830.2010498	1	1	0	1		10	10	0	1	132.5801553	9.470011093
FI1	foraging	infrared	foraginginfrared	170					c5	10	20	10	a2	b	1127.92041	715.3614502	1	1	0	1		10	10	0	1	126.7899335	9.056423825
FI1	foraging	infrared	foraginginfrared	180						10	10	10	a1	b2	1164.11145	663.0883789	1	1	1	1	10	10	10	1	1	63.57881219	4.541343728
FI1	foraging	infrared	foraginginfrared	190							20	10	a	b2	1161	639	1	0	0	0						24.28849767	1.734892691
FI1	foraging	infrared	foraginginfrared	200		3			c4		20	10	a	b2	1187.437622	655.4857788	1	0	0	0						31.15652034	2.225465739
FI1	foraging	infrared	foraginginfrared	210		3			c4		20	10	a	b2	1188.058594	654.7470703	1	0	0	0						0.965037032	0.068931217
FI1	foraging	infrared	foraginginfrared	220		3			c4		20	10	a	b2	1189.259155	654.7006836	1	0	0	0						1.201456799	0.085818343
FI1	foraging	infrared	foraginginfrared	230		3			c4		20	10	a	b2	1188.32605	654.815979	1	0	0	0						0.940201027	0.067157216
FI1	foraging	infrared	foraginginfrared	240		3			c4		20	10	a	b2	1187.351807	653.9865112	1	0	0	0						1.279517977	0.091394141
FI1	foraging	infrared	foraginginfrared	60						-1	15	15	a	b1	887.3915405	600.3970337	1	1	1	0	15		15	1		0	0
FI1	foraging	infrared	foraginginfrared	70						-1	15	15	a	b1	886.9989624	600.0294189	1	1	1	0	15		15	1		0.537827301	0.038416236
FI1	foraging	infrared	foraginginfrared	80						15	15	15	a	b1	887.1195068	599.7905884	1	1	1	1	15	15	15	1	1	0.267527494	0.019109107
FI1	foraging	infrared	foraginginfrared	90						15	15	15	a	b1	887.5202026	599.4488525	1	1	1	1	15	15	15	1	1	0.526631322	0.037616523
FI1	foraging	infrared	foraginginfrared	100						-1	15	15	a	b1	886.8580322	599.2530518	1	1	1	1	15	15	15	1	1	0.690512529	0.049322324
FI1	foraging	infrared	foraginginfrared	110						15	15	15	a	b1	887.260498	598.9767456	1	1	1	1	15	15	15	1	1	0.488184224	0.034870302
FI1	foraging	infrared	foraginginfrared	120						15	15	15	a	b1	886.8880615	599.2997437	1	1	1	1	15	15	15	1	1	0.492987545	0.035213396
FI1	foraging	infrared	foraginginfrared	130						15	15	15	a	b1	887.4703369	599.3912354	1	1	1	1	15	15	15	1	1	0.589419522	0.042101394
FI1	foraging	infrared	foraginginfrared	140						15	15	15	a	b1	887.3339844	599.1658325	1	1	1	1	15	15	15	1	1	0.263435897	0.01881685
FI1	foraging	infrared	foraginginfrared	150						15	15	15	a	b1	887.1091309	599.5909424	1	1	1	1	15	15	15	1	1	0.480913218	0.034350944
FI1	foraging	infrared	foraginginfrared	160						15	15	15	a	b1	886.8284302	599.7005615	1	1	1	1	15	15	15	1	1	0.301345699	0.021524693
FI1	foraging	infrared	foraginginfrared	170						15	15	15	a	b1	887.3887939	599.2185669	1	1	1	1	15	15	15	1	1	0.739138871	0.052795634
FI1	foraging	infrared	foraginginfrared	180						15	15	15	a	b1	887.0947876	599.3094482	1	1	1	1	15	15	15	1	1	0.307732213	0.021980872
FI1	foraging	infrared	foraginginfrared	190						15	15	15	a	b1	886.3146973	598.3970947	1	1	1	1	15	15	15	1	1	1.200387348	0.085741953
FI1	foraging	infrared	foraginginfrared	200						15	15	15	a	b1	887.0994263	597.9690552	1	1	1	1	15	15	15	1	1	0.893877742	0.06384841
FI1	foraging	infrared	foraginginfrared	210						15	15	15	a	b1	887.4524536	598.4512939	1	1	1	1	15	15	15	1	1	0.59764742	0.042689101
FI1	foraging	infrared	foraginginfrared	220						15	15	15	a	b1	887.1455078	598.1329956	1	1	1	1	15	15	15	1	1	0.442187214	0.031584801
FI1	foraging	infrared	foraginginfrared	230						15	15	15	a	b1	887.5385132	597.7111206	1	1	1	1	15	15	15	1	1	0.576568955	0.041183497
FI1	foraging	infrared	foraginginfrared	240						15	15	15	a	b1	886.7566528	599.0444946	1	1	1	1	15	15	15	1	1	1.545701106	0.110407222
FI1	foraging	infrared	foraginginfrared	60						-1	17	17	a	b1	3084.424805	499.6875	1	1	1	0	17		17	1		0	0
FI1	foraging	infrared	foraginginfrared	70						17	17	17	a1	b1	3080.307373	501.3684692	1	1	1	1	17	17	17	1	1	4.447347943	0.31766771
FI1	foraging	infrared	foraginginfrared	80						17	17	17	a	b1	3078.632324	498.5927429	1	1	1	1	17	17	17	1	1	3.241981747	0.231570125
FI1	foraging	infrared	foraginginfrared	90						17	17	17	a	b1	3066.321777	492.5437012	1	1	1	1	17	17	17	1	1	13.71643076	0.979745055
FI1	foraging	infrared	foraginginfrared	100						-1	17	17	a	b1	3067.528564	487.7733765	1	1	1	1	17	17	17	1	1	4.92060287	0.351471634
FI1	foraging	infrared	foraginginfrared	110						17	17	17	a	b1	3061.142822	466.2512817	1	1	1	1	17	17	17	1	1	22.44946025	1.603532875
FI1	foraging	infrared	foraginginfrared	120						17	17	17	a	b1	3053.803467	458.0894165	1	1	1	1	17	17	17	1	1	10.97643728	0.784031234
FI1	foraging	infrared	foraginginfrared	130						17	17	17	a	b1	3057.971924	452.7257996	1	1	1	1	17	17	17	1	1	6.792968424	0.48521203
FI1	foraging	infrared	foraginginfrared	140						17	17	17	a	b1	3058.63623	448.7483521	1	1	1	1	17	17	17	1	1	4.032541516	0.28803868
FI1	foraging	infrared	foraginginfrared	150				1		17	17	17	a	b1	3055.337891	429.8345947	1	1	1	1	17	17	17	1	1	19.19919944	1.371371389
FI1	foraging	infrared	foraginginfrared	160				1		17	17	17	a	b1	3056.08252	424.7432251	1	1	1	1	17	17	17	1	1	5.14553367	0.367538119
FI1	foraging	infrared	foraginginfrared	170				1		17	17	17	a	b1	3055.870605	422.7461853	1	1	1	1	17	17	17	1	1	2.008251959	0.143446568
FI1	foraging	infrared	foraginginfrared	180				1		17	17	17	a	b1	3055.56543	423.3338928	1	1	1	1	17	17	17	1	1	0.662217401	0.047301243
FI1	foraging	infrared	foraginginfrared	190				1		17	17	17	a	b1	3055.578613	428.021759	1	1	1	1	17	17	17	1	1	4.687884736	0.33484891
FI1	foraging	infrared	foraginginfrared	200				1		17	17	17	a	b1	3055.300293	425.039856	1	1	1	1	17	17	17	1	1	2.994863523	0.213918823
FI1	foraging	infrared	foraginginfrared	210				1		17	17	17	a	b1	3055.699707	427.735321	1	1	1	1	17	17	17	1	1	2.724896899	0.194635493
FI1	foraging	infrared	foraginginfrared	220				1		17	17	17	a	b1	3055.341553	427.8988647	1	1	1	1	17	17	17	1	1	0.393726846	0.028123346
FI1	foraging	infrared	foraginginfrared	230				1		17	17	17	a	b1	3055.344727	425.1792603	1	1	1	1	17	17	17	1	1	2.719606252	0.194257589
FI1	foraging	infrared	foraginginfrared	240				1		17	17	17	a	b1	3055.019775	426.0165405	1	1	1	1	17	17	17	1	1	0.898126904	0.064151922
FI1	foraging	infrared	foraginginfrared	60						-1	20	21	a2	b2	858.5212402	1028.957275	1	1	0	0						0	0
FI1	foraging	infrared	foraginginfrared	70						-1	20	21	a1	b2	857.3517456	1028.454224	1	1	0	0						1.273097768	0.090935555
FI1	foraging	infrared	foraginginfrared	80						-1	20	21	a1	b2	856.2745972	1028.818237	1	1	0	0						1.136993465	0.081213819
FI1	foraging	infrared	foraginginfrared	90						-1	20	21	a1	b2	857.4963379	1028.326172	1	1	0	0						1.317109829	0.094079274
FI1	foraging	infrared	foraginginfrared	100						15	20	21	a2	b2	857.361145	1028.170654	1	1	0	0						0.206065447	0.014718961
FI1	foraging	infrared	foraginginfrared	110						-1	20	21	a2	b2	856.3538208	1025.702759	1	1	0	0						2.665559561	0.190397112
FI1	foraging	infrared	foraginginfrared	120						-1	20	21	a2	b2	853.9350586	1024.665039	1	1	0	0						2.631971386	0.187997956
FI1	foraging	infrared	foraginginfrared	130						-1	20	21	a2	b2	851.8143921	1028.973145	1	1	0	0						4.801770893	0.342983635
FI1	foraging	infrared	foraginginfrared	140						-1	20	21	a2	b2	854.9534302	1027.61377	1	1	0	0						3.420739771	0.244338555
FI1	foraging	infrared	foraginginfrared	150						-1	20	21	a2	b2	857.3417358	1028.570679	1	1	0	0						2.572873583	0.183776684
FI1	foraging	infrared	foraginginfrared	160						-1	20	21	a2	b2	858.1595459	1028.598267	1	1	0	0						0.818275294	0.058448235
FI1	foraging	infrared	foraginginfrared	170						-1	20	21	a2	b2	857.9057617	1028.218628	1	1	0	0						0.45665325	0.032618089
FI1	foraging	infrared	foraginginfrared	180						-1	20	21	a2	b1	859.9970703	1028.343506	1	1	0	0						2.095033693	0.149645264
FI1	foraging	infrared	foraginginfrared	190						-1	20	21	a2	b1	858.2939453	1028.092407	1	1	0	0						1.721535789	0.122966842
FI1	foraging	infrared	foraginginfrared	200						-1	20	21	a2	b1	857.963562	1027.972046	1	1	0	0						0.351624651	0.025116047
FI1	foraging	infrared	foraginginfrared	210						-1	20	21	a2	b1	858.8900757	1027.808716	1	1	0	0						0.940799833	0.067199988
FI1	foraging	infrared	foraginginfrared	220						-1	20	21	a2	b1	858.227417	1028.447754	1	1	0	0						0.920590092	0.065756435
FI1	foraging	infrared	foraginginfrared	230						-1	20	21	a2	b1	857.7526855	1027.409912	1	1	0	0						1.141265094	0.081518935
FI1	foraging	infrared	foraginginfrared	240						-1	20	21	a2	b1	858.9794922	1028.242554	1	1	0	0						1.482682494	0.105905892
FI1	foraging	infrared	foraginginfrared	60						-1	20	25	a2	b1	3043.290039	343.9766846	1	1	0	0						0	0
FI1	foraging	infrared	foraginginfrared	70						-1	20	25	a2	b1	3041.223389	344.3188477	1	1	0	0						2.094783476	0.149627391
FI1	foraging	infrared	foraginginfrared	80						-1	20	25	a2	b2	3042.504639	343.4593201	1	1	0	0						1.542851016	0.110203644
FI1	foraging	infrared	foraginginfrared	90						-1	20	25	a2	b1	3043.24707	343.2887573	1	1	0	0						0.761771264	0.054412233
FI1	foraging	infrared	foraginginfrared	100						17	20	25	a2	b1	3044.277832	342.5744934	1	1	0	0						1.254050724	0.089575052
FI1	foraging	infrared	foraginginfrared	110						-1	20	25	a2	b1	3045.752441	332.2210999	1	1	0	0						10.45787878	0.746991342
FI1	foraging	infrared	foraginginfrared	120						-1	20	25	a2	b1	3046.141113	346.252533	1	1	0	0						14.03681519	1.002629657
FI1	foraging	infrared	foraginginfrared	130						-1	20	25	a2	b2	3047.621338	345.1056213	1	1	0	0						1.872557742	0.133754124
FI1	foraging	infrared	foraginginfrared	140						-1	20	25	a1	b2	3045.29248	347.2328491	1	1	0	0						3.154152453	0.225296604
FI1	foraging	infrared	foraginginfrared	150				1	c2		20	25	a1	b2	3048	339	1	0	0	0						8.666629613	0.619044972
FI1	foraging	infrared	foraginginfrared	160				1	c4		20	25	a	b	3039	345	1	0	0	0						10.81665383	0.77261813
FI1	foraging	infrared	foraginginfrared	170				1	c4		20	25	a1	b2	3042	339	1	0	0	0						6.708203932	0.479157424
FI1	foraging	infrared	foraginginfrared	180				1	c4		20	25	a	b2	3045	346	1	0	0	0						7.615773106	0.543983793
FI1	foraging	infrared	foraginginfrared	190				1	c4		20	25	a	b2	3045	348	1	0	0	0						2	0.142857143
FI1	foraging	infrared	foraginginfrared	200				1	c5		20	25	a1	b2	3048	351	1	0	0	0						4.242640687	0.303045763
FI1	foraging	infrared	foraginginfrared	210				1	c4		20	25	a1	b2	3045	342	1	0	0	0						9.486832981	0.677630927
FI1	foraging	infrared	foraginginfrared	220				1	c4		20	25	a1	b2	3054	339	1	0	0	0						9.486832981	0.677630927
FI1	foraging	infrared	foraginginfrared	230				1	c4		20	25	a1	b2	3045	348	1	0	0	0						12.72792206	0.90913729
FI1	foraging	infrared	foraginginfrared	240				1	c4		20	25	a1	b2	3039	348	1	0	0	0						6	0.428571429
FI1	foraging	infrared	foraginginfrared	60				1	c1		20	26	a2	b2	3192	393	1	0	0	0						0	0
FI1	foraging	infrared	foraginginfrared	70				1	c1		20	26	a2	b2	3201	381	1	0	0	0						15	1.071428571
FI1	foraging	infrared	foraginginfrared	80				1	c1		20	26	a2	b2	3201	387	1	0	0	0						6	0.428571429
FI1	foraging	infrared	foraginginfrared	90				1	c1		20	26	a2	b2	3201	384	1	0	0	0						3	0.214285714
FI1	foraging	infrared	foraginginfrared	100				1	c1		20	26	a2	b2	3201	390	1	0	0	0						6	0.428571429
FI1	foraging	infrared	foraginginfrared	110				1	c1		20	26	a2	b2	3204	381	1	0	0	0						9.486832981	0.677630927
FI1	foraging	infrared	foraginginfrared	120				1	c1		20	26	a2	b2	3195	390	1	0	0	0						12.72792206	0.90913729
FI1	foraging	infrared	foraginginfrared	130				1	c1		20	26	a2	b2	3204	384	1	0	0	0						10.81665383	0.77261813
FI1	foraging	infrared	foraginginfrared	140				1	c1		20	26	a2	b2	3210	390	1	0	0	0						8.485281374	0.606091527
FI1	foraging	infrared	foraginginfrared	150				1	c1		20	26	a2	b2	3204	381	1	0	0	0						10.81665383	0.77261813
FI1	foraging	infrared	foraginginfrared	160				1	c1		20	26	a2	b2	3186	387	1	0	0	0						18.97366596	1.355261854
FI1	foraging	infrared	foraginginfrared	170				1	c1		20	26	a2	b2	3201	381	1	0	0	0						16.15549442	1.153963887
FI1	foraging	infrared	foraginginfrared	180				1	c1		20	26	a2	b2	3189	387	1	0	0	0						13.41640786	0.958314847
FI1	foraging	infrared	foraginginfrared	190				1	c1		20	26	a2	b2	3210	387	1	0	0	0						21	1.5
FI1	foraging	infrared	foraginginfrared	200				1	c1		20	26	a2	b2	3180	369	1	0	0	0						34.98571137	2.498979384
FI1	foraging	infrared	foraginginfrared	210				1	c1		20	26	a2	b2	3201	378	1	0	0	0						22.84731932	1.63195138
FI1	foraging	infrared	foraginginfrared	220				1	c1		20	26	a2	b2	3201	387	1	0	0	0						9	0.642857143
FI1	foraging	infrared	foraginginfrared	230				1	c1		20	26	a2	b2	3201	381	1	0	0	0						6	0.428571429
FI1	foraging	infrared	foraginginfrared	240				1	c1		20	26	a2	b2	3198	384	1	0	0	0						4.242640687	0.303045763
FI1	foraging	infrared	foraginginfrared	60				1	c1		20	27	a2	b2	3198	534	1	0	0	0						0	0
FI1	foraging	infrared	foraginginfrared	70				1	c1		20	27	a1	b2	3189	537	1	0	0	0						9.486832981	0.677630927
FI1	foraging	infrared	foraginginfrared	80				1	c1		20	27	a2	b2	3207	531	1	0	0	0						18.97366596	1.355261854
FI1	foraging	infrared	foraginginfrared	90				1	c1		20	27	a2	b2	3201	534	1	0	0	0						6.708203932	0.479157424
FI1	foraging	infrared	foraginginfrared	100				1	c1		20	27	a2	b2	3216	531	1	0	0	0						15.29705854	1.092647039
FI1	foraging	infrared	foraginginfrared	110				1	c1		20	27	a2	b2	3195	540	1	0	0	0						22.84731932	1.63195138
FI1	foraging	infrared	foraginginfrared	120				1	c1		20	27	a2	b2	3195	540	1	0	0	0						0	0
FI1	foraging	infrared	foraginginfrared	130				1	c1		20	27	a2	b2	3210	537	1	0	0	0						15.29705854	1.092647039
FI1	foraging	infrared	foraginginfrared	140				1	c1		20	27	a2	b2	3201	534	1	0	0	0						9.486832981	0.677630927
FI1	foraging	infrared	foraginginfrared	150				1	c1		20	27	a2	b2	3213	528	1	0	0	0						13.41640786	0.958314847
FI1	foraging	infrared	foraginginfrared	160				1	c1		20	27	a2	b2	3210	525	1	0	0	0						4.242640687	0.303045763
FI1	foraging	infrared	foraginginfrared	170				1	c1		20	27	a2	b2	3210	540	1	0	0	0						15	1.071428571
FI1	foraging	infrared	foraginginfrared	180				1	c1		20	27	a2	b2	3204	531	1	0	0	0						10.81665383	0.77261813
FI1	foraging	infrared	foraginginfrared	190				1	c1		20	27	a2	b2	3204	540	1	0	0	0						9	0.642857143
FI1	foraging	infrared	foraginginfrared	200				1	c1		20	27	a2	b2	3195	531	1	0	0	0						12.72792206	0.90913729
FI1	foraging	infrared	foraginginfrared	210				1	c1		20	27	a2	b2	3208	532	1	0	0	0						13.03840481	0.931314629
FI1	foraging	infrared	foraginginfrared	220				1	c1		20	27	a2	b2	3195	531	1	0	0	0						13.03840481	0.931314629
FI1	foraging	infrared	foraginginfrared	230				1	c1		20	27	a2	b2	3213	534	1	0	0	0						18.24828759	1.303449114
FI1	foraging	infrared	foraginginfrared	240				1	c1		20	27	a2	b2	3213	525	1	0	0	0						9	0.642857143
FI1	foraging	infrared	foraginginfrared	60					c4	-1	20	28	a1	b2	3151.567383	728.625061	1	1	0	0						0	0
FI1	foraging	infrared	foraginginfrared	70						-1	20	28	a2	b2	3150.793701	748.9996948	1	1	0	0						20.38931795	1.456379853
FI1	foraging	infrared	foraginginfrared	80						-1	20	28	a2	b2	3172.302734	767.3966675	1	1	0	0						28.30348221	2.021677301
FI1	foraging	infrared	foraginginfrared	90					c4	-1	20	28	a1	b2	3162.271973	750.8929443	1	1	0	0						19.31292432	1.379494594
FI1	foraging	infrared	foraginginfrared	100							20	28	a2	b2	3177	777	1	1	0	0						29.97487509	2.141062506
FI1	foraging	infrared	foraginginfrared	110				1	c1		20	28	a2	b2	3189	831	1	0	0	0						55.31726674	3.951233339
FI1	foraging	infrared	foraginginfrared	120					c4	-1	20	28	a	b2	3179.506348	854.2199707	1	1	0	0						25.08578218	1.791841584
FI1	foraging	infrared	foraginginfrared	130					c4	-1	20	28	a	b2	3180.885986	856.0429688	1	1	0	0						2.286202765	0.163300198
FI1	foraging	infrared	foraginginfrared	140						-1	20	28	a1	b2	3181.617188	857.0371094	1	1	0	0						1.234087476	0.088149105
FI1	foraging	infrared	foraginginfrared	150				1	c1		20	28	a2	b2	3186	843	1	0	0	0						14.70542353	1.050387395
FI1	foraging	infrared	foraginginfrared	160				1	c1		20	28	a2	b2	3201	855	1	0	0	0						19.20937271	1.372098051
FI1	foraging	infrared	foraginginfrared	170				1	c1		20	28	a2	b2	3192	867	1	0	0	0						15	1.071428571
FI1	foraging	infrared	foraginginfrared	180				1	c1		20	28	a2	b2	3189	846	1	0	0	0						21.21320344	1.515228817
FI1	foraging	infrared	foraginginfrared	190				1	c1		20	28	a2	b2	3207	822	1	0	0	0						30	2.142857143
FI1	foraging	infrared	foraginginfrared	200				1	c1		20	28	a2	b2	3207	828	1	0	0	0						6	0.428571429
FI1	foraging	infrared	foraginginfrared	210				1	c1		20	28	a2	b2	3204	818	1	0	0	0						10.44030651	0.745736179
FI1	foraging	infrared	foraginginfrared	220				1	c1		20	28	a2	b2	3210	832	1	0	0	0						15.23154621	1.087967587
FI1	foraging	infrared	foraginginfrared	230				1	c1		20	28	a2	b2	3198	840	1	0	0	0						14.4222051	1.030157507
FI1	foraging	infrared	foraginginfrared	240				1	c1		20	28	a2	b2	3210	831	1	0	0	0						15	1.071428571
FI1	foraging	infrared	foraginginfrared	60		1			c5		20	30	a	b2	1611	1884	1	0	0	0						0	0
FI1	foraging	infrared	foraginginfrared	70		1			c4		20	30	a	b2	1611	1896	1	0	0	0						12	0.857142857
FI1	foraging	infrared	foraginginfrared	80		1			c4		20	30	a	b2	1599	1899	1	0	0	0						12.36931688	0.883522634
FI1	foraging	infrared	foraginginfrared	90		1					20	30	a	b2	1605	1893	1	0	0	0						8.485281374	0.606091527
FI1	foraging	infrared	foraginginfrared	100		1			c4		20	30	a	b2	1605	1893	1	0	0	0						0	0
FI1	foraging	infrared	foraginginfrared	110		1			c4		20	30	a2	b2	1617	1887	1	0	0	0						13.41640786	0.958314847
FI1	foraging	infrared	foraginginfrared	120		1			c4	-1	20	30	a	b2	1637.977295	1909.392578	1	1	0	0						30.68345572	2.191675409
FI1	foraging	infrared	foraginginfrared	130		1			c4	-1	20	30	a	b2	1645.433472	1911.443481	1	1	0	0						7.733096312	0.552364022
FI1	foraging	infrared	foraginginfrared	140					c4	-1	20	30	a	b2	1645.550293	1900.45813	1	1	0	0						10.98597213	0.784712295
FI1	foraging	infrared	foraginginfrared	150						-1	20	30	a	b2	1649.792603	1902.411865	1	1	0	0						4.670575402	0.333612529
FI1	foraging	infrared	foraginginfrared	160					c4	-1	20	30	a	b2	1647.367676	1906.902344	1	1	0	0						5.103398143	0.364528439
FI1	foraging	infrared	foraginginfrared	170					c4	-1	20	30	a	b2	1650.724121	1908.838013	1	1	0	0						3.874601594	0.276757257
FI1	foraging	infrared	foraginginfrared	180						-1	20	30	a2	b2	1646.066284	1903.428345	1	1	0	0						7.138624054	0.509901718
FI1	foraging	infrared	foraginginfrared	190						-1	20	30	a2	b2	1650.078125	1907.197754	1	1	0	0						5.50484445	0.393203175
FI1	foraging	infrared	foraginginfrared	200						-1	20	30	a2	b2	1651.769897	1908.219971	1	1	0	0						1.976618348	0.141187025
FI1	foraging	infrared	foraginginfrared	210		1					20	30	a2	b2	1647	1914	1	0	0	0						7.494041142	0.535288653
FI1	foraging	infrared	foraginginfrared	220		1					20	30	a2	b2	1644	1914	1	0	0	0						3	0.214285714
FI1	foraging	infrared	foraginginfrared	230		1				-1	20	30	a2	b2	1657.945557	1917.215454	1	1	0	0						14.31145361	1.022246687
FI1	foraging	infrared	foraginginfrared	240		1				-1	20	30	a2	b2	1657.317505	1916.525757	1	1	0	0						0.932808269	0.066629162
FI2	foraging	infrared	foraginginfrared	60						-1	2	2	a	b	1803.974609	1879.949585	1	1	1	0	2		2	1		0	0
FI2	foraging	infrared	foraginginfrared	70						2	2	2	a	b	1803.136841	1881.699951	1	1	1	1	2	2	2	1	1	1.940524763	0.138608912
FI2	foraging	infrared	foraginginfrared	80						2	2	2	a	b	1806.948364	1872.324219	1	1	1	1	2	2	2	1	1	10.1208724	0.722919457
FI2	foraging	infrared	foraginginfrared	90						2	2	2	a	b	1811.614258	1863.983765	1	1	1	1	2	2	2	1	1	9.556868721	0.68263348
FI2	foraging	infrared	foraginginfrared	100						2	2	2	a	b1	1815.542725	1861.354858	1	1	1	1	2	2	2	1	1	4.726944572	0.337638898
FI2	foraging	infrared	foraginginfrared	110						2	2	2	a	b	1824.497925	1850.639038	1	1	1	1	2	2	2	1	1	13.96511387	0.997508133
FI2	foraging	infrared	foraginginfrared	120						2	2	2	a	b	1826.732666	1847.593262	1	1	1	1	2	2	2	1	1	3.777673726	0.269833838
FI2	foraging	infrared	foraginginfrared	130						2	2	2	a	b1	1826.826782	1840.957886	1	1	1	1	2	2	2	1	1	6.636043436	0.474003103
FI2	foraging	infrared	foraginginfrared	140						2	2	2	a	b	1823.060913	1839.609497	1	1	1	1	2	2	2	1	1	3.999990278	0.285713591
FI2	foraging	infrared	foraginginfrared	150						2	2	2	a	b1	1845.258057	1836.344849	1	1	1	1	2	2	2	1	1	22.43593386	1.602566705
FI2	foraging	infrared	foraginginfrared	160						2	2	2	a	b1	1876.352661	1837.936768	1	1	1	1	2	2	2	1	1	31.13532727	2.223951948
FI2	foraging	infrared	foraginginfrared	170						2	2	2	a	b1	1869.185181	1837.741699	1	1	1	1	2	2	2	1	1	7.170133992	0.512152428
FI2	foraging	infrared	foraginginfrared	180						2	2	2	a	b1	1872.850098	1838.057373	1	1	1	1	2	2	2	1	1	3.678487011	0.262749072
FI2	foraging	infrared	foraginginfrared	190						2	2	2	a	b1	1879.219482	1840.3396	1	1	1	1	2	2	2	1	1	6.765915505	0.483279679
FI2	foraging	infrared	foraginginfrared	200						2	2	2	a	b1	1870.772461	1842.330566	1	1	1	1	2	2	2	1	1	8.678485432	0.619891817
FI2	foraging	infrared	foraginginfrared	210						2	2	2	a	b	1861.944214	1846.891479	1	1	1	1	2	2	2	1	1	9.936793874	0.709770991
FI2	foraging	infrared	foraginginfrared	220						2	2	2	a	b1	1843.082031	1850.137939	1	1	1	1	2	2	2	1	1	19.13952586	1.36710899
FI2	foraging	infrared	foraginginfrared	230						2	2	2	a	b1	1821.115479	1850.584351	1	1	1	1	2	2	2	1	1	21.9710876	1.5693634
FI2	foraging	infrared	foraginginfrared	240						2	2	2	a1	b	1817.765503	1862.021729	1	1	1	1	2	2	2	1	1	11.91788382	0.851277416
FI2	foraging	infrared	foraginginfrared	60		2				-1	20	3	a1	b1	3112.69458	399.2886658	1	1	0	0						0	0
FI2	foraging	infrared	foraginginfrared	70		2				-1	3	3	a1	b1	3116.963867	398.6643677	1	1	1	0	3		3	1		4.314691137	0.308192224
FI2	foraging	infrared	foraginginfrared	80		2				-1	3	3	a1	b1	3117.594238	398.9662476	1	1	1	0	3		3	1		0.698927086	0.049923363
FI2	foraging	infrared	foraginginfrared	90		2				-1	3	3	a1	b1	3118.943359	399.3226624	1	1	1	0	3		3	1		1.395406386	0.099671885
FI2	foraging	infrared	foraginginfrared	100		2				-1	3	3	a1	b1	3119.14917	399.4455872	1	1	1	0	3		3	1		0.239726248	0.017123303
FI2	foraging	infrared	foraginginfrared	110		2				-1	3	3	a1	b1	3120.512451	399.723938	1	1	1	0	3		3	1		1.391407292	0.099386235
FI2	foraging	infrared	foraginginfrared	120		2				-1	3	3	a1	b1	3123.206787	415.5449829	1	1	1	0	3		3	1		16.04882887	1.14634492
FI2	foraging	infrared	foraginginfrared	130		2				-1	3	3	a1	b1	3115.393555	398.1192322	1	1	1	0	3		3	1		19.09720874	1.364086339
FI2	foraging	infrared	foraginginfrared	140		2				-1	3	3	a1	b1	3107.967041	396.5245972	1	1	1	0	3		3	1		7.595786396	0.542556171
FI2	foraging	infrared	foraginginfrared	150						-1	3	3	a1	b1	3092.083008	399.593689	1	1	1	0	3		3	1		16.17781904	1.155558503
FI2	foraging	infrared	foraginginfrared	160		2				-1	3	3	a1	b1	3094.821777	413.3078613	1	1	1	0	3		3	1		13.9849697	0.998926407
FI2	foraging	infrared	foraginginfrared	170						-1	3	3	a	b1	3085.8479	412.7961121	1	1	1	0	3		3	1		8.988456801	0.642032629
FI2	foraging	infrared	foraginginfrared	180						-1	3	3	a	b	3082.565918	413.6012878	1	1	1	0	3		3	1		3.379306698	0.24137905
FI2	foraging	infrared	foraginginfrared	190						-1	3	3	a	b	3086.424805	410.903656	1	1	1	0	3		3	1		4.708314582	0.336308184
FI2	foraging	infrared	foraginginfrared	200		2				-1	3	3	a	b	3087.665527	419.187561	1	1	1	0	3		3	1		8.376304264	0.598307447
FI2	foraging	infrared	foraginginfrared	210		2				-1	3	3	a1	b	3089.349854	423.7415771	1	1	1	0	3		3	1		4.855514399	0.346822457
FI2	foraging	infrared	foraginginfrared	220		2				-1	3	3	a	b	3088.249512	417.8251953	1	1	1	0	3		3	1		6.017834006	0.429845286
FI2	foraging	infrared	foraginginfrared	230						-1	3	3	a	b	3082.101563	415.4107666	1	1	1	0	3		3	1		6.605054341	0.471789596
FI2	foraging	infrared	foraginginfrared	240						-1	3	3	a	b	3084.90625	413.959198	1	1	1	0	3		3	1		3.158056454	0.225575461
FI2	foraging	infrared	foraginginfrared	60						-1	20	4	a1	b2	1888.044678	464.8710632	1	1	0	0						0	0
FI2	foraging	infrared	foraginginfrared	70						-1	20	4	a1	b2	1887.125	464.3779907	1	1	0	0						1.043517184	0.074536942
FI2	foraging	infrared	foraginginfrared	80						-1	20	4	a2	b2	1891.039795	460.9026489	1	0	0	0						5.234846752	0.373917625
FI2	foraging	infrared	foraginginfrared	90					c4	-1	20	4	a	b2	1891.235107	463.8851624	1	1	0	0						2.988901731	0.213492981
FI2	foraging	infrared	foraginginfrared	100						-1	20	4	a1	b1	1909.8396	467.1220703	1	1	0	0						18.88398084	1.348855775
FI2	foraging	infrared	foraginginfrared	110						-1	20	4	a1	b1	1932.9729	478.3359985	1	1	0	0						25.70800954	1.836286396
FI2	foraging	infrared	foraginginfrared	120						-1	4	4	a	b1	1961.844971	477.5949097	1	1	1	0	4		4	1		28.88158057	2.062970041
FI2	foraging	infrared	foraginginfrared	130						-1	4	4	a1	b1	1998.912354	466.2485962	1	1	1	0	4		4	1		38.76505788	2.768932706
FI2	foraging	infrared	foraginginfrared	140						-1	4	4	a1	b1	2010.912598	482.4645691	1	1	1	0	4		4	1		20.17333966	1.440952833
FI2	foraging	infrared	foraginginfrared	150						-1	20	4	a1	b1	2013.230835	482.4338379	1	1	0	0						2.318440682	0.165602906
FI2	foraging	infrared	foraginginfrared	160						-1	20	4	a2	b2	2004.177246	488.1327515	1	1	0	0						10.6979012	0.7641358
FI2	foraging	infrared	foraginginfrared	170						-1	20	4	a2	b2	2018.779663	484.8329773	1	1	0	0						14.9706076	1.069329115
FI2	foraging	infrared	foraginginfrared	180						-1	4	4	a1	b1	2020.339355	482.6026306	1	1	1	0	4		4	1		2.721596138	0.194399724
FI2	foraging	infrared	foraginginfrared	190						-1	4	4	a	b1	2016.047607	483.3328857	1	1	1	0	4		4	1		4.353432371	0.310959455
FI2	foraging	infrared	foraginginfrared	200						-1	4	4	a	b1	2027.782959	489.064209	1	1	1	0	4		4	1		13.06011307	0.932865219
FI2	foraging	infrared	foraginginfrared	210						4	20	4	a2	b1	2007.788696	491.2997437	1	1	0	1		4	4	0	1	20.11885107	1.437060791
FI2	foraging	infrared	foraginginfrared	220					c4	4	20	4	a1	b2	2037.676147	491.1236572	1	1	0	1		4	4	0	1	29.88796972	2.13485498
FI2	foraging	infrared	foraginginfrared	230					c4	4	20	4	a	b2	2041.564575	495.4710083	1	1	0	1		4	4	0	1	5.832609527	0.416614966
FI2	foraging	infrared	foraginginfrared	240						4	20	4	a1	b1	2053.759521	489.8701782	1	1	0	1		4	4	0	1	13.41961273	0.958543766
FI2	foraging	infrared	foraginginfrared	60						-1	5	5	a	b	2737.9104	1982.479492	1	1	1	0	5		5	1		0	0
FI2	foraging	infrared	foraginginfrared	70						-1	5	5	a	b	2737.302002	1984.89917	1	1	1	0	5		5	1		2.494992936	0.178213781
FI2	foraging	infrared	foraginginfrared	80						-1	5	5	a	b	2737.697266	1984.692993	1	1	1	0	5		5	1		0.445805546	0.031843253
FI2	foraging	infrared	foraginginfrared	90						5	5	5	a	b	2739.12915	1984.976196	1	1	1	1	5	5	5	1	1	1.459621776	0.104258698
FI2	foraging	infrared	foraginginfrared	100						5	5	5	a	b	2739.233887	1984.918213	1	1	1	1	5	5	5	1	1	0.119715778	0.008551127
FI2	foraging	infrared	foraginginfrared	110						5	5	5	a	b	2738.146484	1984.682129	1	1	1	1	5	5	5	1	1	1.112735791	0.079481128
FI2	foraging	infrared	foraginginfrared	120						5	5	5	a	b	2737.983398	1985.191162	1	1	1	1	5	5	5	1	1	0.534520008	0.038180001
FI2	foraging	infrared	foraginginfrared	130						5	5	5	a	b	2739.588135	1984.34021	1	1	1	1	5	5	5	1	1	1.816397574	0.129742684
FI2	foraging	infrared	foraginginfrared	140						5	5	5	a	b	2737.94458	1985.129639	1	1	1	1	5	5	5	1	1	1.823313244	0.13023666
FI2	foraging	infrared	foraginginfrared	150						5	5	5	a	b	2738.218994	1984.878906	1	1	1	1	5	5	5	1	1	0.371712363	0.026550883
FI2	foraging	infrared	foraginginfrared	160						5	5	5	a	b	2738.364258	1984.779175	1	1	1	1	5	5	5	1	1	0.176204149	0.012586011
FI2	foraging	infrared	foraginginfrared	170						5	5	5	a	b	2739.169678	1984.07019	1	1	1	1	5	5	5	1	1	1.073014961	0.076643926
FI2	foraging	infrared	foraginginfrared	180						5	5	5	a	b	2738.931152	1984.041016	1	1	1	1	5	5	5	1	1	0.240303506	0.017164536
FI2	foraging	infrared	foraginginfrared	190						5	5	5	a	b	2739.351807	1984.072388	1	1	1	1	5	5	5	1	1	0.421823223	0.03013023
FI2	foraging	infrared	foraginginfrared	200						5	5	5	a	b	2737.710205	1984.703003	1	1	1	1	5	5	5	1	1	1.758559753	0.125611411
FI2	foraging	infrared	foraginginfrared	210						5	5	5	a	b	2738.896973	1985.25293	1	1	1	1	5	5	5	1	1	1.307990058	0.093427861
FI2	foraging	infrared	foraginginfrared	220						5	5	5	a	b	2738.779297	1985.040527	1	1	1	1	5	5	5	1	1	0.242822312	0.017344451
FI2	foraging	infrared	foraginginfrared	230						5	5	5	a	b	2738.936768	1984.953125	1	1	1	1	5	5	5	1	1	0.180100598	0.012864328
FI2	foraging	infrared	foraginginfrared	240						5	5	5	a	b	2737.34082	1984.643433	1	1	1	1	5	5	5	1	1	1.625718042	0.116122717
FI2	foraging	infrared	foraginginfrared	60						-1	20	7	a1	b1	3118.311523	545.8273926	1	1	0	0						0	0
FI2	foraging	infrared	foraginginfrared	70						-1	20	7	a2	b2	3128.384277	529.5366211	1	1	0	0						19.15331849	1.368094178
FI2	foraging	infrared	foraginginfrared	80						-1	20	7	a2	b2	3172.505371	520.5974121	1	1	0	0						45.0175565	3.21553975
FI2	foraging	infrared	foraginginfrared	90						-1	20	7	a2	b2	3169.885254	521.9705811	1	1	0	0						2.958142356	0.211295883
FI2	foraging	infrared	foraginginfrared	100						-1	20	7	a2	b2	3171.321045	517.0233154	1	1	0	0						5.15140114	0.367957224
FI2	foraging	infrared	foraginginfrared	110				1	c4		20	7	a	b1	3204	510	1	0	0	0						33.42515608	2.387511149
FI2	foraging	infrared	foraginginfrared	120				1	c4		20	7	a1	b2	3207	486	1	0	0	0						24.18677324	1.72762666
FI2	foraging	infrared	foraginginfrared	130				1	c1		20	7	a1	b2	3210	474	1	0	0	0						12.36931688	0.883522634
FI2	foraging	infrared	foraginginfrared	140				1	c1		20	7	a1	b2	3201	471	1	0	0	0						9.486832981	0.677630927
FI2	foraging	infrared	foraginginfrared	150		4			c1		20	7	a1	b2	3204	477	1	0	0	0						6.708203932	0.479157424
FI2	foraging	infrared	foraginginfrared	160				1	c1		20	7	a1	b1	3207	444	1	0	0	0						33.13608305	2.366863075
FI2	foraging	infrared	foraginginfrared	170		4			c1		20	7	a1	b1	3186	423	1	0	0	0						29.69848481	2.121320344
FI2	foraging	infrared	foraginginfrared	180		4				-1	20	7	a2	b1	3167.169434	400.2636414	1	1	0	0						29.52172451	2.108694608
FI2	foraging	infrared	foraginginfrared	190		4				-1	20	7	a2	b1	3166.767578	360.441925	1	1	0	0						39.82374399	2.844553142
FI2	foraging	infrared	foraginginfrared	200					c4	-1	20	7	a	b2	3105.799805	332.5285645	1	1	0	0						67.05389652	4.789564037
FI2	foraging	infrared	foraginginfrared	210					c4	-1	20	7	a	b2	3102.884033	326.1306458	1	1	0	0						7.031009177	0.502214941
FI2	foraging	infrared	foraginginfrared	220					c	-1	20	7	a2	b2	3064.218018	319.5397034	1	1	0	0						39.22373309	2.801695221
FI2	foraging	infrared	foraginginfrared	230					c1	-1	20	7	a2	b2	3039.26123	319.8505554	1	1	0	0						24.95872385	1.782765989
FI2	foraging	infrared	foraginginfrared	240				1	c1		20	7	a2	b2	3078	297	1	0	0	0						44.97599563	3.212571117
FI2	foraging	infrared	foraginginfrared	60		2					8	8	a1	b1	3129	462	1	0	1	0	8		8	1		0	0
FI2	foraging	infrared	foraginginfrared	70		2					8	8	a1	b1	3144	456	1	0	1	0	8		8	1		16.15549442	1.153963887
FI2	foraging	infrared	foraginginfrared	80		2					8	8	a1	b1	3141	453	1	0	1	0	8		8	1		4.242640687	0.303045763
FI2	foraging	infrared	foraginginfrared	90		2					8	8	a1	b1	3141	459	1	0	1	0	8		8	1		6	0.428571429
FI2	foraging	infrared	foraginginfrared	100		2					8	8	a1	b1	3141	453	1	0	1	0	8		8	1		6	0.428571429
FI2	foraging	infrared	foraginginfrared	110		2					18	8	a1	b1	3141	450	1	0	1	0	18		8	0		3	0.214285714
FI2	foraging	infrared	foraginginfrared	120		2					8	8	a1	b1	3141	465	1	0	1	0	8		8	1		15	1.071428571
FI2	foraging	infrared	foraginginfrared	130		2					8	8	a2	b1	3135	459	1	0	1	0	8		8	1		8.485281374	0.606091527
FI2	foraging	infrared	foraginginfrared	140		2					8	8	a1	b1	3141	453	1	0	1	0	8		8	1		8.485281374	0.606091527
FI2	foraging	infrared	foraginginfrared	150		4				-1	8	8	a2	b1	3160.837402	459.7108765	1	1	1	0	8		8	1		20.94178554	1.495841824
FI2	foraging	infrared	foraginginfrared	160		2					8	8	a1	b1	3144	438	1	0	1	0	8		8	1		27.47472046	1.962480033
FI2	foraging	infrared	foraginginfrared	170		4				-1	8	8	a	b	3164.775635	421.7258606	1	1	1	0	8		8	1		26.39080565	1.885057546
FI2	foraging	infrared	foraginginfrared	180		4					8	8	a1	b1	3174	399	1	0	1	0	8		8	1		24.52659067	1.751899333
FI2	foraging	infrared	foraginginfrared	190		4					8	8	a1	b1	3150	408	1	0	1	0	8		8	1		25.63201124	1.830857945
FI2	foraging	infrared	foraginginfrared	200		2					8	8	a	b1	3156	411	1	0	1	0	8		8	1		6.708203932	0.479157424
FI2	foraging	infrared	foraginginfrared	210		2					8	8	a	b	3156	411	1	0	1	0	8		8	1		0	0
FI2	foraging	infrared	foraginginfrared	220		2					8	8	a	b1	3159	393	1	0	1	0	8		8	1		18.24828759	1.303449114
FI2	foraging	infrared	foraginginfrared	230						-1	8	8	a	b1	3153.261475	395.813385	1	1	1	0	8		8	1		6.391072237	0.45650516
FI2	foraging	infrared	foraginginfrared	240						-1	8	8	a1	b1	3153.464844	391.9287415	1	1	1	0	8		8	1		3.889963248	0.277854518
FI2	foraging	infrared	foraginginfrared	60		3					20	9	a1	b	2790	1824	1	0	0	0						0	0
FI2	foraging	infrared	foraginginfrared	70						9	9	9	a	b	2788.848389	1813.830444	1	1	1	1	9	9	9	1	1	10.2345531	0.731039507
FI2	foraging	infrared	foraginginfrared	80						9	9	9	a	b	2785.989746	1814.247681	1	1	1	1	9	9	9	1	1	2.888931726	0.206352266
FI2	foraging	infrared	foraginginfrared	90			1			9	9	9	a	b	2783.157227	1828.71106	1	1	1	1	9	9	9	1	1	14.73813068	1.05272362
FI2	foraging	infrared	foraginginfrared	100			1			9	9	9	a	b1	2791.763428	1815.875977	1	1	1	1	9	9	9	1	1	15.45335081	1.103810772
FI2	foraging	infrared	foraginginfrared	110						9	9	9	a	b1	2784.028564	1828.298584	1	1	1	1	9	9	9	1	1	14.63384043	1.045274317
FI2	foraging	infrared	foraginginfrared	120						9	9	9	a	b1	2787.865967	1816.116699	1	1	1	1	9	9	9	1	1	12.772	0.912285714
FI2	foraging	infrared	foraginginfrared	130						9	9	9	a	b1	2792.450195	1816.20874	1	1	1	1	9	9	9	1	1	4.585151895	0.32751085
FI2	foraging	infrared	foraginginfrared	140						9	9	9	a	b1	2793.594238	1813.997314	1	1	1	1	9	9	9	1	1	2.489827171	0.177844798
FI2	foraging	infrared	foraginginfrared	150						9	9	9	a	b1	2793.095215	1814.887085	1	1	1	1	9	9	9	1	1	1.02015508	0.07286822
FI2	foraging	infrared	foraginginfrared	160						9	9	9	a	b1	2793.9375	1814.239136	1	1	1	1	9	9	9	1	1	1.062676775	0.075905484
FI2	foraging	infrared	foraginginfrared	170						9	9	9	a	b1	2794.628174	1813.385132	1	1	1	1	9	9	9	1	1	1.098341207	0.078452943
FI2	foraging	infrared	foraginginfrared	180						9	9	9	a	b1	2797.15918	1814.019287	1	1	1	1	9	9	9	1	1	2.609242023	0.18637443
FI2	foraging	infrared	foraginginfrared	190						9	9	9	a	b1	2797.210693	1814.345337	1	1	1	1	9	9	9	1	1	0.330094216	0.023578158
FI2	foraging	infrared	foraginginfrared	200						9	9	9	a	b1	2794.691895	1813.835449	1	1	1	1	9	9	9	1	1	2.569888935	0.183563495
FI2	foraging	infrared	foraginginfrared	210						9	9	9	a	b1	2795.362305	1814.30249	1	1	1	1	9	9	9	1	1	0.81705377	0.058360984
FI2	foraging	infrared	foraginginfrared	220						9	9	9	a	b1	2795.910645	1814.306885	1	1	1	1	9	9	9	1	1	0.548357613	0.039168401
FI2	foraging	infrared	foraginginfrared	230						9	9	9	a	b1	2794.387207	1814.059204	1	1	1	1	9	9	9	1	1	1.543440708	0.110245765
FI2	foraging	infrared	foraginginfrared	240						9	9	9	a	b1	2794.76416	1814.588989	1	1	1	1	9	9	9	1	1	0.650204361	0.046443169
FI2	foraging	infrared	foraginginfrared	60						-1	15	15	a	b	1225.610352	599.3908081	1	1	1	0	15		15	1		0	0
FI2	foraging	infrared	foraginginfrared	70						-1	20	15	a1	b	1190.556274	699.3681641	1	1	0	0						105.9446086	7.567472045
FI2	foraging	infrared	foraginginfrared	80						-1	15	15	a	b	1145.768311	836.7091064	1	1	1	0	15		15	1		144.4593232	10.31852309
FI2	foraging	infrared	foraginginfrared	90						-1	15	15	a1	b	1157.137329	1025.070557	1	1	1	0	15		15	1		188.7042412	13.47887437
FI2	foraging	infrared	foraginginfrared	100						-1	20	15	a2	b	1105.871704	1227.323975	1	1	0	0						208.6494893	14.90353495
FI2	foraging	infrared	foraginginfrared	110						-1	20	15	a1	b	1147.234375	1409.623901	1	1	0	0						186.9335004	13.35239289
FI2	foraging	infrared	foraginginfrared	120						-1	20	15	a2	b	1312.915649	1535.917236	1	1	0	0						208.327365	14.88052607
FI2	foraging	infrared	foraginginfrared	130						-1	15	15	a	b	1465.188721	1695.447632	1	1	1	0	15		15	1		220.5380595	15.75271854
FI2	foraging	infrared	foraginginfrared	140						-1	15	15	a1	b	1546.991333	1846.631104	1	1	1	0	15		15	1		171.8956356	12.27825969
FI2	foraging	infrared	foraginginfrared	150						-1	15	15	a	b	1548.38269	1904.085449	1	1	1	0	15		15	1		57.4711896	4.105084971
FI2	foraging	infrared	foraginginfrared	160						-1	20	15	a2	b	1417.999146	1938.237671	1	1	0	0						134.7822051	9.627300365
FI2	foraging	infrared	foraginginfrared	170						-1	15	15	a1	b1	1192.573608	1949.847412	1	1	1	0	15		15	1		225.7242992	16.12316423
FI2	foraging	infrared	foraginginfrared	180						-1	15	15	a	b	1015.417053	1931.68457	1	1	1	0	15		15	1		178.0851869	12.7203705
FI2	foraging	infrared	foraginginfrared	190						-1	20	15	a2	b1	985.7557373	1946.788086	1	1	0	0						33.2852797	2.377519978
FI2	foraging	infrared	foraginginfrared	200						-1	20	15	a2	b	932.1733398	1967.650024	1	1	0	0						57.50038069	4.107170049
FI2	foraging	infrared	foraginginfrared	210						-1	15	15	a	b	918.5372314	1972.01062	1	1	1	0	15		15	1		14.31636301	1.022597358
FI2	foraging	infrared	foraginginfrared	220						-1	15	15	a1	b1	936.6144409	1947.555298	1	1	1	0	15		15	1		30.41131825	2.172237018
FI2	foraging	infrared	foraginginfrared	230						15	15	15	a	b1	973.5924683	1951.083862	1	1	1	1	15	15	15	1	1	37.14599944	2.653285674
FI2	foraging	infrared	foraginginfrared	240						15	20	15	a2	b2	979.9443359	1945.789063	1	1	0	1		15	15	0	1	8.269287663	0.590663405
FI2	foraging	infrared	foraginginfrared	60						-1	20	17	a2	b1	2844.841553	1935.671387	1	1	0	0						0	0
FI2	foraging	infrared	foraginginfrared	70						-1	20	17	a2	b1	2842.075684	1938.044312	1	1	0	0						3.644283795	0.260305985
FI2	foraging	infrared	foraginginfrared	80						-1	20	17	a2	b1	2842.000488	1938.481201	1	1	0	0						0.443313023	0.031665216
FI2	foraging	infrared	foraginginfrared	90						-1	20	17	a2	b1	2841.505859	1937.740967	1	1	0	0						0.890283226	0.063591659
FI2	foraging	infrared	foraginginfrared	100						-1	20	17	a2	b1	2842.60498	1937.159546	1	1	0	0						1.243429673	0.088816405
FI2	foraging	infrared	foraginginfrared	110						-1	20	17	a2	b1	2844.030762	1938.289307	1	1	0	0						1.819124578	0.12993747
FI2	foraging	infrared	foraginginfrared	120						-1	20	17	a2	b1	2842.541748	1938.994507	1	1	0	0						1.647564788	0.117683199
FI2	foraging	infrared	foraginginfrared	130						-1	20	17	a2	b1	2843.452148	1938.001465	1	1	0	0						1.347204726	0.096228909
FI2	foraging	infrared	foraginginfrared	140						-1	20	17	a2	b2	2845.059326	1938.346924	1	1	0	0						1.643886567	0.117420469
FI2	foraging	infrared	foraginginfrared	150						-1	20	17	a2	b1	2843.822998	1939.790771	1	1	0	0						1.900842204	0.135774443
FI2	foraging	infrared	foraginginfrared	160						-1	20	17	a2	b2	2846.315674	1939.065063	1	1	0	0						2.59616751	0.185440536
FI2	foraging	infrared	foraginginfrared	170						-1	20	17	a2	b2	2846.533936	1938.262085	1	1	0	0						0.832112955	0.05943664
FI2	foraging	infrared	foraginginfrared	180						-1	20	17	a2	b2	2849.076172	1939.1073	1	1	0	0						2.679058095	0.191361292
FI2	foraging	infrared	foraginginfrared	190						-1	20	17	a1	b2	2849.940674	1938.480347	1	1	0	0						1.067910938	0.076279353
FI2	foraging	infrared	foraginginfrared	200						-1	20	17	a1	b1	2841.515869	1940.453613	1	1	0	0						8.652809832	0.618057845
FI2	foraging	infrared	foraginginfrared	210						-1	20	17	a1	b1	2838.842773	1938.177124	1	1	0	0						3.511103016	0.250793073
FI2	foraging	infrared	foraginginfrared	220						-1	20	17	a1	b1	2840.664063	1938.052124	1	1	0	0						1.825574502	0.130398179
FI2	foraging	infrared	foraginginfrared	230						-1	16	17	a1	b1	2839.025879	1938.249756	1	1	1	0	16		16	1		1.650062188	0.117861585
FI2	foraging	infrared	foraginginfrared	240						-1	16	17	a1	b1	2839.083984	1938.177368	1	1	1	0	16		16	1		0.092823561	0.006630254
FI2	foraging	infrared	foraginginfrared	60						-1	20	18	a1	b1	944.0043335	467.4279175	1	1	0	0						0	0
FI2	foraging	infrared	foraginginfrared	70						-1	20	18	a1	b1	940.4377441	465.6910706	1	1	0	0						3.967013625	0.283358116
FI2	foraging	infrared	foraginginfrared	80						-1	18	18	a	b1	935.2637329	479.4231567	1	1	1	0	18		18	1		14.6744874	1.048177672
FI2	foraging	infrared	foraginginfrared	90						-1	20	18	a1	b1	935.0042114	477.3776855	1	1	0	0						2.061869016	0.147276358
FI2	foraging	infrared	foraginginfrared	100						-1	18	18	a1	b1	934.4484863	466.2687378	1	1	1	0	18		18	1		11.12283909	0.794488506
FI2	foraging	infrared	foraginginfrared	110						-1	18	18	a1	b1	934.2861328	466.9266663	1	1	1	0	18		18	1		0.677664054	0.048404575
FI2	foraging	infrared	foraginginfrared	120						-1	18	18	a	b1	941.2250366	477.9768372	1	1	1	0	18		18	1		13.04816703	0.932011931
FI2	foraging	infrared	foraginginfrared	130					c4	-1	20	18	a	b2	940.6005859	466.2321777	1	1	0	0						11.76124846	0.840089176
FI2	foraging	infrared	foraginginfrared	140					c	-1	20	18	a	b2	947.6726074	477.4305725	1	1	0	0						13.24452846	0.946037747
FI2	foraging	infrared	foraginginfrared	150					c	-1	20	18	a	b2	946.8490601	477.4126587	1	1	0	0						0.823742107	0.058838722
FI2	foraging	infrared	foraginginfrared	160					c	-1	20	18	a	b1	949.9923706	466.533783	1	1	0	0						11.32388349	0.808848821
FI2	foraging	infrared	foraginginfrared	170					c	-1	20	18	a	b2	949.3504028	466.5545654	1	1	0	0						0.642304106	0.045878865
FI2	foraging	infrared	foraginginfrared	180					c	-1	20	18	a	b2	946.3729248	477.2810669	1	1	0	0						11.1320802	0.795148586
FI2	foraging	infrared	foraginginfrared	190					c	-1	20	18	a	b2	944.8845215	477.738678	1	1	0	0						1.557161617	0.11122583
FI2	foraging	infrared	foraginginfrared	200					c	-1	20	18	a2	b	945.5622559	477.2012634	1	1	0	0						0.864949923	0.061782137
FI2	foraging	infrared	foraginginfrared	210					c	-1	20	18	a	b2	941.0363159	466.0196228	1	1	0	0						12.06288603	0.861634716
FI2	foraging	infrared	foraginginfrared	220					c	-1	20	18	a	b2	942.2841187	466.6213379	1	1	0	0						1.385306063	0.098950433
FI2	foraging	infrared	foraginginfrared	230					c	-1	20	18	a	b2	940.9022827	477.2950745	1	1	0	0						10.76281207	0.768772291
FI2	foraging	infrared	foraginginfrared	240					c	-1	20	18	a	b2	940.6126099	467.0125427	1	1	0	0						10.28661123	0.734757945
FI2	foraging	infrared	foraginginfrared	60						-1	20	19	a1	b1	2335.580322	1850.101685	1	1	0	0						0	0
FI2	foraging	infrared	foraginginfrared	70						19	19	19	a	b1	2334.810303	1850.788452	1	1	1	1	19	19	19	1	1	1.031783976	0.073698855
FI2	foraging	infrared	foraginginfrared	80						19	19	19	a	b1	2335.418701	1850.680542	1	0	1	1	19	19	19	1	1	0.617893757	0.044135268
FI2	foraging	infrared	foraginginfrared	90						19	19	19	a	b1	2334.679688	1850.789551	1	1	1	1	19	19	19	1	1	0.747009489	0.053357821
FI2	foraging	infrared	foraginginfrared	100						19	19	19	a	b1	2335.372803	1850.819824	1	1	1	1	19	19	19	1	1	0.693775798	0.049555414
FI2	foraging	infrared	foraginginfrared	110						19	19	19	a	b1	2334.943848	1850.743774	1	1	1	1	19	19	19	1	1	0.435644344	0.031117453
FI2	foraging	infrared	foraginginfrared	120						19	19	19	a	b1	2335.000488	1850.880249	1	1	1	1	19	19	19	1	1	0.147761684	0.010554406
FI2	foraging	infrared	foraginginfrared	130						19	19	19	a	b1	2334.587646	1851.019775	1	1	1	1	19	19	19	1	1	0.43578208	0.031127291
FI2	foraging	infrared	foraginginfrared	140						19	19	19	a	b1	2335.084229	1850.799927	1	1	1	1	19	19	19	1	1	0.543072572	0.038790898
FI2	foraging	infrared	foraginginfrared	150						19	19	19	a	b1	2334.214844	1850.618286	1	1	1	1	19	19	19	1	1	0.888157492	0.063439821
FI2	foraging	infrared	foraginginfrared	160						19	19	19	a	b1	2334.171875	1850.675171	1	1	1	1	19	19	19	1	1	0.071289818	0.00509213
FI2	foraging	infrared	foraginginfrared	170						19	19	19	a	b1	2334.798584	1850.913452	1	1	1	1	19	19	19	1	1	0.670478938	0.047891353
FI2	foraging	infrared	foraginginfrared	180						19	19	19	a	b1	2335.735596	1850.812378	1	1	1	1	19	19	19	1	1	0.94244758	0.067317684
FI2	foraging	infrared	foraginginfrared	190						19	19	19	a	b1	2335.686768	1850.539551	1	1	1	1	19	19	19	1	1	0.277161948	0.019797282
FI2	foraging	infrared	foraginginfrared	200						19	19	19	a	b1	2335.39624	1850.868652	1	1	1	1	19	19	19	1	1	0.438992012	0.031356572
FI2	foraging	infrared	foraginginfrared	210						19	19	19	a	b1	2335.643799	1850.651855	1	1	1	1	19	19	19	1	1	0.329068986	0.023504928
FI2	foraging	infrared	foraginginfrared	220						19	19	19	a	b1	2336.248291	1850.519775	1	1	1	1	19	19	19	1	1	0.618753347	0.044196668
FI2	foraging	infrared	foraginginfrared	230						19	19	19	a	b1	2336.042969	1850.713745	1	1	1	1	19	19	19	1	1	0.282456164	0.02017544
FI2	foraging	infrared	foraginginfrared	240						19	19	19	a	b1	2334.968994	1850.869629	1	1	1	1	19	19	19	1	1	1.085229064	0.077516362
FI2	foraging	infrared	foraginginfrared	60		1			c4	-1	20	21	a	b2	906.4943237	691.3544922	1	1	0	0						0	0
FI2	foraging	infrared	foraginginfrared	70					c4		20	21	a	b2	894	717	1	0	0	0						28.52718344	2.03765596
FI2	foraging	infrared	foraginginfrared	80					c4		20	21	a	b2	891	708	1	0	0	0						9.486832981	0.677630927
FI2	foraging	infrared	foraginginfrared	90		1			c4	-1	20	21	a	b2	873	624	1	1	0	0						85.90692638	6.136209027
FI2	foraging	infrared	foraginginfrared	100		1			c4		20	21	a	b2	897	711	1	0	0	0						90.24965374	6.446403838
FI2	foraging	infrared	foraginginfrared	110					c4		20	21	a	b2	894	708	1	0	0	0						4.242640687	0.303045763
FI2	foraging	infrared	foraginginfrared	120		1			c4	-1	20	21	a1	b2	908.7116699	663.4248657	1	1	0	0						46.94013026	3.352866447
FI2	foraging	infrared	foraginginfrared	130					c4		20	21	a1	b2	897	708	1	0	0	0						46.08802241	3.292001601
FI2	foraging	infrared	foraginginfrared	140					c4		20	21	a	b2	900	717	1	0	0	0						9.486832981	0.677630927
FI2	foraging	infrared	foraginginfrared	150					c4		20	21	a1	b2	894	702	1	0	0	0						16.15549442	1.153963887
FI2	foraging	infrared	foraginginfrared	160					c4		20	21	a	b2	897	714	1	0	0	0						12.36931688	0.883522634
FI2	foraging	infrared	foraginginfrared	170					c4		20	21	a	b2	900	705	1	0	0	0						9.486832981	0.677630927
FI2	foraging	infrared	foraginginfrared	180					c4		20	21	a	b2	897	708	1	0	0	0						4.242640687	0.303045763
FI2	foraging	infrared	foraginginfrared	190					c4		20	21	a	b2	903	711	1	0	0	0						6.708203932	0.479157424
FI2	foraging	infrared	foraginginfrared	200					c4		20	21	a	b2	900	711	1	0	0	0						3	0.214285714
FI2	foraging	infrared	foraginginfrared	210					c4		20	21	a	b2	900	717	1	0	0	0						6	0.428571429
FI2	foraging	infrared	foraginginfrared	220					c4		20	21	a	b2	903	717	1	0	0	0						3	0.214285714
FI2	foraging	infrared	foraginginfrared	230					c4		20	21	a	b2	897	705	1	0	0	0						13.41640786	0.958314847
FI2	foraging	infrared	foraginginfrared	240					c4		20	21	a	b2	903	714	1	0	0	0						10.81665383	0.77261813
FI2	foraging	infrared	foraginginfrared	60		1			c4		20	22	a1	b2	873	621	1	0	0	0						0	0
FI2	foraging	infrared	foraginginfrared	70					c4		20	22	a	b2	876	633	1	0	0	0						12.36931688	0.883522634
FI2	foraging	infrared	foraginginfrared	80					c4		20	22	a	b2	873	630	1	0	0	0						4.242640687	0.303045763
FI2	foraging	infrared	foraginginfrared	90		1			c4		20	22	a	b2	909.5644531	664.699585	1	0	0	0						50.40853529	3.600609663
FI2	foraging	infrared	foraginginfrared	100		1			c4	-1	20	22	a	b2	908.7139282	663.4497681	1	1	0	0						1.511765487	0.107983249
FI2	foraging	infrared	foraginginfrared	110					c4		20	22	a	b2	867	624	1	0	0	0						57.41372666	4.100980476
FI2	foraging	infrared	foraginginfrared	120		1			c4		20	22	a	b2	879	636	1	0	0	0						16.97056275	1.212183053
FI2	foraging	infrared	foraginginfrared	130					c4		20	22	a1	b2	876	621	1	0	0	0						15.29705854	1.092647039
FI2	foraging	infrared	foraginginfrared	140					c4		20	22	a	b2	879	624	1	0	0	0						4.242640687	0.303045763
FI2	foraging	infrared	foraginginfrared	150					c4		20	22	a1	b2	873	624	1	0	0	0						6	0.428571429
FI2	foraging	infrared	foraginginfrared	160					c4		20	22	a	b2	876	621	1	0	0	0						4.242640687	0.303045763
FI2	foraging	infrared	foraginginfrared	170					c4		20	22	a	b2	873	621	1	0	0	0						3	0.214285714
FI2	foraging	infrared	foraginginfrared	180					c4		20	22	a	b2	876	621	1	0	0	0						3	0.214285714
FI2	foraging	infrared	foraginginfrared	190					c4		20	22	a	b2	873	627	1	0	0	0						6.708203932	0.479157424
FI2	foraging	infrared	foraginginfrared	200					c4		20	22	a	b2	873	630	1	0	0	0						3	0.214285714
FI2	foraging	infrared	foraginginfrared	210					c4		20	22	a	b2	882	624	1	0	0	0						10.81665383	0.77261813
FI2	foraging	infrared	foraginginfrared	220					c4		20	22	a	b2	876	618	1	0	0	0						8.485281374	0.606091527
FI2	foraging	infrared	foraginginfrared	230					c4		20	22	a	b2	876	624	1	0	0	0						6	0.428571429
FI2	foraging	infrared	foraginginfrared	240					c4		20	22	a	b2	882	615	1	0	0	0						10.81665383	0.77261813
FI2	foraging	infrared	foraginginfrared	60					c4		20	31	a	b2	1971	816	1	0	0	0						0	0
FI2	foraging	infrared	foraginginfrared	70					c4		20	31	a	b2	1971	810	1	0	0	0						6	0.428571429
FI2	foraging	infrared	foraginginfrared	80					c3		20	31	a	b2	1959	813	1	0	0	0						12.36931688	0.883522634
FI2	foraging	infrared	foraginginfrared	90					c4		20	31	a	b2	1971	810	1	0	0	0						12.36931688	0.883522634
FI2	foraging	infrared	foraginginfrared	100					c4		20	31	a	b2	1965	819	1	0	0	0						10.81665383	0.77261813
FI2	foraging	infrared	foraginginfrared	110					c4		20	31	a	b2	1962	816	1	0	0	0						4.242640687	0.303045763
FI2	foraging	infrared	foraginginfrared	120					c4		20	31	a	b2	1962	816	1	0	0	0						0	0
FI2	foraging	infrared	foraginginfrared	130					c4		20	31	a	b2	1968	819	1	0	0	0						6.708203932	0.479157424
FI2	foraging	infrared	foraginginfrared	140					c4		20	31	a	b2	1962	825	1	0	0	0						8.485281374	0.606091527
FI2	foraging	infrared	foraginginfrared	150					c4		20	31	a	b2	1965	816	1	0	0	0						9.486832981	0.677630927
FI2	foraging	infrared	foraginginfrared	160					c4		20	31	a	b2	1968	819	1	0	0	0						4.242640687	0.303045763
FI2	foraging	infrared	foraginginfrared	170					c4		20	31	a	b2	1968	819	1	0	0	0						0	0
FI2	foraging	infrared	foraginginfrared	180					c4		20	31	a	b2	1968	813	1	0	0	0						6	0.428571429
FI2	foraging	infrared	foraginginfrared	190					c4		20	31	a	b2	1956	819	1	0	0	0						13.41640786	0.958314847
FI2	foraging	infrared	foraginginfrared	200					c4		20	31	a	b2	1982	816	1	0	0	0						26.17250466	1.869464618
FI2	foraging	infrared	foraginginfrared	210					c4		20	31	a	b2	1968	816	1	0	0	0						14	1
FI2	foraging	infrared	foraginginfrared	220					c4		20	31	a	b2	1968	813	1	0	0	0						3	0.214285714
FI2	foraging	infrared	foraginginfrared	230					c4		20	31	a	b2	1959	816	1	0	0	0						9.486832981	0.677630927
FI2	foraging	infrared	foraginginfrared	240					c4		20	31	a	b2	1965	825	1	0	0	0						10.81665383	0.77261813
FI2	foraging	infrared	foraginginfrared	60		3				-1	20	44	a1	b1	2849.037354	1781.22644	1	1	0	0						0	0
FI2	foraging	infrared	foraginginfrared	70						-1	20	44	a2	b1	2854.43457	1783.164429	1	1	0	0						5.734609134	0.409614938
FI2	foraging	infrared	foraginginfrared	80						-1	4	44	a	b1	2858.674316	1793.834351	1	1	1	0	4		4	1		11.48140591	0.820100422
FI2	foraging	infrared	foraginginfrared	90			1			-1	4	44	a	b1	2857.375488	1793.084351	1	1	1	0	4		4	1		1.499818047	0.10712986
FI2	foraging	infrared	foraginginfrared	100			1			-1	4	44	a	b1	2859.031494	1792.679321	1	1	1	0	4		4	1		1.704818223	0.12177273
FI2	foraging	infrared	foraginginfrared	110						-1	4	44	a	b1	2865.071777	1780.779175	1	1	1	0	4		4	1		13.34535476	0.953239625
FI2	foraging	infrared	foraginginfrared	120						-1	20	44	a2	b1	2873.123291	1760.161743	1	1	0	0						22.13380627	1.580986162
FI2	foraging	infrared	foraginginfrared	130						-1	4	44	a	b	2898.324707	1730.789429	1	1	1	0	4		4	1		38.70199217	2.764428012
FI2	foraging	infrared	foraginginfrared	140						-1	4	44	a1	b	2996.33374	1731.921631	1	1	1	0	4		4	1		98.01557239	7.001112314
FI2	foraging	infrared	foraginginfrared	150						-1	4	44	a2	b1	3003.562256	1699.90271	1	1	1	0	4		4	1		32.82472765	2.344623404
FI2	foraging	infrared	foraginginfrared	160					c5	-1	20	44	a2	b1	3001.063477	1628.508911	1	1	0	0						71.43751418	5.102679584
FI2	foraging	infrared	foraginginfrared	170						-1	20	44	a2	b	3039.186768	1577.350464	1	1	0	0						63.8010346	4.557216757
FI2	foraging	infrared	foraginginfrared	180						-1	4	44	a1	b	3141.753174	1524.391357	1	1	1	0	4		4	1		115.4319482	8.245139154
FI2	foraging	infrared	foraginginfrared	190						-1	20	44	a2	b	3148.062012	1390.376221	1	1	0	0						134.1635499	9.583110705
FI2	foraging	infrared	foraginginfrared	200						-1	20	44	a1	b	3132.112305	1235.049438	1	1	0	0						156.1435323	11.15310945
FI2	foraging	infrared	foraginginfrared	210						-1	20	44	a1	b	3101.489746	1137.385864	1	1	0	0						102.3519165	7.310851177
FI2	foraging	infrared	foraginginfrared	220						-1	20	44	a2	b	3038.532715	961.9696655	1	1	0	0						186.3717534	13.3122681
FI2	foraging	infrared	foraginginfrared	230					c5	-1	20	44	a2	b	3012.921387	781.0991211	1	1	0	0						182.6748312	13.04820223
FI2	foraging	infrared	foraginginfrared	240					c5	-1	20	44	a2	b1	3065.426758	597.1297607	1	1	0	0						191.3152883	13.66537774
FI3	foraging	infrared	foraginginfrared	60						-1	0	0	a1	b1	2315.019043	413.9372864	1	1	1	0	0		0	1		0	0
FI3	foraging	infrared	foraginginfrared	70						-1	0	0	a1	b1	2321.840088	399.4182434	1	1	1	0	0		0	1		16.04148573	1.14582041
FI3	foraging	infrared	foraginginfrared	80						-1	20	0	a2	b1	2324.05249	417.0696411	1	1	0	0						17.78950711	1.27067908
FI3	foraging	infrared	foraginginfrared	90						-1	20	0	a2	b2	2316.587891	419.1970215	1	1	0	0						7.761828753	0.55441634
FI3	foraging	infrared	foraginginfrared	100					c5	-1	20	0	a1	b2	2322.682617	419.6668091	1	1	0	0						6.112805036	0.436628931
FI3	foraging	infrared	foraginginfrared	110					c4	-1	20	0	a1	b2	2332.145752	424.5524902	1	1	0	0						10.64992037	0.760708598
FI3	foraging	infrared	foraginginfrared	120						7	0	0	a1	b1	2349	420	1	1	1	1	0	7	7	0	1	17.45826001	1.247018572
FI3	foraging	infrared	foraginginfrared	130			1			-1	0	0	a1	b1	2395.202881	430.2871704	1	1	1	0	0		0	1		47.33425913	3.381018509
FI3	foraging	infrared	foraginginfrared	140		1					0	0	a1	b1	2395.017334	431.4685059	1	0	1	0	0		0	1		1.195818236	0.085415588
FI3	foraging	infrared	foraginginfrared	150		1					0	0	a1	b1	2398.466064	431.9238281	1	0	1	0	0		0	1		3.478657344	0.248475525
FI3	foraging	infrared	foraginginfrared	160		1					0	0	a1	b1	2399.682861	432.1606445	1	0	1	0	0		0	1		1.239627745	0.088544839
FI3	foraging	infrared	foraginginfrared	170		1					0	0	a1	b1	2397.957031	432.2783813	1	0	1	0	0		0	1		1.729841364	0.123560097
FI3	foraging	infrared	foraginginfrared	180		1					0	0	a1	b1	2395.27417	431.6217651	1	0	1	0	0		0	1		2.762044167	0.197288869
FI3	foraging	infrared	foraginginfrared	190		1					0	0	a1	b1	2395.976318	431.4833679	1	0	1	0	0		0	1		0.715657459	0.05111839
FI3	foraging	infrared	foraginginfrared	200		1				-1	0	0	a1	b1	2394.5625	430.6029053	1	1	1	0	0		0	1		1.665561685	0.118968692
FI3	foraging	infrared	foraginginfrared	210		1					0	0	a1	b1	2395.670654	430.9385376	1	0	1	0	0		0	1		1.157866283	0.082704734
FI3	foraging	infrared	foraginginfrared	220		1					0	0	a1	b1	2394.750732	430.3450623	1	0	1	0	0		0	1		1.09474628	0.078196163
FI3	foraging	infrared	foraginginfrared	230		1					0	0	a1	b1	2395.477783	430.6248474	1	0	1	0	0		0	1		0.779026867	0.055644776
FI3	foraging	infrared	foraginginfrared	240		1					0	0	a1	b1	2395.157959	430.8998413	1	0	1	0	0		0	1		0.421792646	0.030128046
FI3	foraging	infrared	foraginginfrared	60					c5	-1	20	2	a2	b2	1449.167969	1872.780762	1	1	0	0						0	0
FI3	foraging	infrared	foraginginfrared	70						-1	20	2	a2	b	1164.189331	1943.535156	1	1	0	0						293.6307347	20.97362391
FI3	foraging	infrared	foraginginfrared	80						-1	2	2	a1	b	968.9299927	1929.947144	1	1	1	0	2		2	1		195.7315592	13.98082566
FI3	foraging	infrared	foraginginfrared	90					c5	-1	20	2	a2	b1	903.5425415	1712.505615	1	1	0	0						227.0602064	16.21858617
FI3	foraging	infrared	foraginginfrared	100					c5	-1	20	2	a2	b2	929.7597046	1392.647461	1	1	0	0						320.9307999	22.92362856
FI3	foraging	infrared	foraginginfrared	110						-1	20	2	a2	b	900.960083	1095.022461	1	1	0	0						299.0151482	21.35822487
FI3	foraging	infrared	foraginginfrared	120					c5	-1	20	2	a2	b2	901.9334717	798.0484619	1	1	0	0						296.9755943	21.21254245
FI3	foraging	infrared	foraginginfrared	130						-1	2	2	a1	b	916.196106	551.1870728	1	1	1	0	2		2	1		247.273064	17.66236171
FI3	foraging	infrared	foraginginfrared	140					c5	-1	20	2	a2	b2	1031.501709	460.5907898	1	1	0	0						146.6392464	10.47423188
FI3	foraging	infrared	foraginginfrared	150						-1	2	2	a	b	1164.052612	446.1915588	1	1	1	0	2		2	1		133.3307157	9.523622547
FI3	foraging	infrared	foraginginfrared	160					c5	-1	20	2	a1	b	1237.409302	413.8216858	1	1	0	0						80.181124	5.727223143
FI3	foraging	infrared	foraginginfrared	170						-1	2	2	a2	b	1371.074219	398.7367554	1	1	1	0	2		2	1		134.5134386	9.608102757
FI3	foraging	infrared	foraginginfrared	180					c5	-1	20	2	a2	b1	1568.29126	430.8890381	1	1	0	0						199.820746	14.27291043
FI3	foraging	infrared	foraginginfrared	190						-1	20	2	a2	b1	1763.487061	445.7781677	1	1	0	0						195.7628333	13.98305952
FI3	foraging	infrared	foraginginfrared	200						-1	2	2	a2	b	1879.236328	411.7320251	1	1	1	0	2		2	1		120.6525285	8.618037751
FI3	foraging	infrared	foraginginfrared	210						-1	2	2	a	b	1959.507813	413.7058105	1	1	1	0	2		2	1		80.29574791	5.735410565
FI3	foraging	infrared	foraginginfrared	220						-1	2	2	a	b1	1990.664429	418.8467407	1	1	1	0	2		2	1		31.57790183	2.255564416
FI3	foraging	infrared	foraginginfrared	230						-1	2	2	a	b	1995.818604	420.3320923	1	1	1	0	2		2	1		5.363934126	0.383138152
FI3	foraging	infrared	foraginginfrared	240						-1	2	2	a1	b1	1997.945801	422.1997681	1	1	1	0	2		2	1		2.830756078	0.202196863
FI3	foraging	infrared	foraginginfrared	60					c5	-1	20	3	a2	b	2999.91748	548.0901489	1	1	0	0						0	0
FI3	foraging	infrared	foraginginfrared	70						-1	3	3	a	b1	2969.180664	498.9463806	1	1	1	0	3		3	1		57.96431506	4.140308219
FI3	foraging	infrared	foraginginfrared	80						-1	3	3	a1	b1	2970.070801	496.1081848	1	1	1	0	3		3	1		2.974508241	0.212464874
FI3	foraging	infrared	foraginginfrared	90						-1	3	3	a1	b1	2969.584961	495.9609985	1	1	1	0	3		3	1		0.507645853	0.036260418
FI3	foraging	infrared	foraginginfrared	100						-1	3	3	a1	b1	2967.930176	498.7391968	1	1	1	0	3		3	1		3.233681987	0.230977285
FI3	foraging	infrared	foraginginfrared	110						-1	3	3	a	b1	2963.595215	487.6607971	1	1	1	0	3		3	1		11.8963367	0.849738335
FI3	foraging	infrared	foraginginfrared	120						-1	3	3	a1	b1	2959.956543	486.4057617	1	1	1	0	3		3	1		3.849032057	0.274930861
FI3	foraging	infrared	foraginginfrared	130						-1	20	3	a2	b2	2957.97998	491.0178528	1	1	0	0						5.017786923	0.358413352
FI3	foraging	infrared	foraginginfrared	140						-1	20	3	a2	b2	2959.000488	478.3366394	1	1	0	0						12.72220932	0.908729237
FI3	foraging	infrared	foraginginfrared	150						-1	20	3	a2	b	3015.050781	415.8981628	1	1	0	0						83.90589196	5.993277997
FI3	foraging	infrared	foraginginfrared	160						-1	20	3	a2	b	3099.932129	461.6318359	1	1	0	0						96.41790339	6.886993099
FI3	foraging	infrared	foraginginfrared	170					c5	-1	20	3	a1	b2	3093.59375	548.9639282	1	1	0	0						87.56180328	6.25441452
FI3	foraging	infrared	foraginginfrared	180						-1	3	3	a1	b1	2949.033691	679.8824463	1	1	1	0	3		3	1		195.0314565	13.93081832
FI3	foraging	infrared	foraginginfrared	190						-1	20	3	a2	b2	2957.085449	679.5844727	1	1	0	0						8.057269709	0.575519265
FI3	foraging	infrared	foraginginfrared	200						-1	20	3	a2	b2	2952.36792	670.9116211	1	1	0	0						9.872863553	0.70520454
FI3	foraging	infrared	foraginginfrared	210						-1	20	3	a2	b2	2953.636719	679.6152954	1	1	0	0						8.795669231	0.628262088
FI3	foraging	infrared	foraginginfrared	220					c4	-1	20	3	a2	b2	2959.363281	679.9238281	1	1	0	0						5.734867459	0.40963339
FI3	foraging	infrared	foraginginfrared	230						-1	20	3	a2	b2	2958.940674	678.8106689	1	1	0	0						1.190680512	0.085048608
FI3	foraging	infrared	foraginginfrared	240					c5	-1	20	3	a2	b2	2950.937744	680.812439	1	1	0	0						8.249483142	0.589248796
FI3	foraging	infrared	foraginginfrared	60					c5	-1	20	4	a1	b1	3100.02832	553.2119751	1	1	0	0						0	0
FI3	foraging	infrared	foraginginfrared	70						-1	20	4	a2	b2	3108.612549	661.5631714	1	1	0	0						108.6907113	7.763622237
FI3	foraging	infrared	foraginginfrared	80						-1	20	4	a2	b1	3123.593262	800.4936523	1	1	0	0						139.7358232	9.981130228
FI3	foraging	infrared	foraginginfrared	90					c5	-1	20	4	a1	b2	3066.140137	917.4214478	1	1	0	0						130.2803551	9.305739652
FI3	foraging	infrared	foraginginfrared	100					c5	-1	20	4	a2	b1	2965.962646	1069.634521	1	1	0	0						182.2206063	13.01575759
FI3	foraging	infrared	foraginginfrared	110						-1	20	4	a1	b1	2841.475098	1265.772461	1	1	0	0						232.3085042	16.59346458
FI3	foraging	infrared	foraginginfrared	120					c5	-1	20	4	a2	b	2895.720459	1475.981812	1	1	0	0						217.0956712	15.50683365
FI3	foraging	infrared	foraginginfrared	130						-1	20	4	a2	b1	2956.635986	1736.160034	1	1	0	0						267.2141625	19.08672589
FI3	foraging	infrared	foraginginfrared	140						-1	4	4	a1	b1	2897.715332	1901.404419	1	1	1	0	4		4	1		175.4347464	12.53105331
FI3	foraging	infrared	foraginginfrared	150					c5	-1	20	4	a2	b2	2809.535889	1898.785034	1	1	0	0						88.21833905	6.301309932
FI3	foraging	infrared	foraginginfrared	160					c5	-1	20	4	a2	b1	2670.791992	1894.674561	1	1	0	0						138.8047728	9.914626626
FI3	foraging	infrared	foraginginfrared	170					c5	-1	20	4	a2	b	2415.411621	1861.194092	1	1	0	0						257.5656726	18.39754804
FI3	foraging	infrared	foraginginfrared	180					c5	-1	20	4	a2	b2	2345.39624	1831.470337	1	1	0	0						76.06349445	5.433106746
FI3	foraging	infrared	foraginginfrared	190					c5	-1	20	4	a2	b1	2204.04126	1570.792969	1	1	0	0						296.5365417	21.18118155
FI3	foraging	infrared	foraginginfrared	200							4	4	a	b1	2106	1455	1	0	1	0	4		4	1		151.7237632	10.83741166
FI3	foraging	infrared	foraginginfrared	210							20	4	a2	b	1869	1518	1	0	0	0						245.2305038	17.51646456
FI3	foraging	infrared	foraginginfrared	220						-1	4	4	a	b	1709.754028	1492.431152	1	1	1	0	4		4	1		161.2856025	11.52040018
FI3	foraging	infrared	foraginginfrared	230						-1	20	4	a2	b1	1809.760498	1469.300415	1	1	0	0						102.6466027	7.331900189
FI3	foraging	infrared	foraginginfrared	240					c5	1	20	4	a1	b	1895.121948	1390.036011	1	1	0	1		1	1	0	1	116.4878658	8.320561846
FI3	foraging	infrared	foraginginfrared	60						-1	5	5	a1	b1	2579.02124	494.2380981	1	1	1	0	5		5	1		0	0
FI3	foraging	infrared	foraginginfrared	70						-1	5	5	a	b1	2575.878906	487.0196838	1	1	1	0	5		5	1		7.872723034	0.56233736
FI3	foraging	infrared	foraginginfrared	80						-1	5	5	a1	b1	2568.268555	476.8166504	1	1	1	0	5		5	1		12.72868151	0.909191536
FI3	foraging	infrared	foraginginfrared	90						-1	5	5	a1	b1	2554.636963	464.094696	1	1	1	0	5		5	1		18.64586882	1.331847773
FI3	foraging	infrared	foraginginfrared	100						-1	20	5	a1	b1	2508.387939	453.1011963	1	1	0	0						47.53766145	3.395547247
FI3	foraging	infrared	foraginginfrared	110						-1	5	5	a	b1	2456.94165	443.6166382	1	1	1	0	5		5	1		52.31326308	3.736661649
FI3	foraging	infrared	foraginginfrared	120						-1	5	5	a	b1	2447.319092	445.1001282	1	1	1	0	5		5	1		9.736239779	0.695445699
FI3	foraging	infrared	foraginginfrared	130			1			-1	5	5	a1	b1	2448.902832	444.070343	1	1	1	0	5		5	1		1.889097654	0.134935547
FI3	foraging	infrared	foraginginfrared	140		1				-1	3	5	a2	b2	2458	420	1	1	1	0	3		5	0		25.73207877	1.838005626
FI3	foraging	infrared	foraginginfrared	150		1				-1	3	5	a2	b2	2458	411	1	1	1	0	3		3	1		9	0.642857143
FI3	foraging	infrared	foraginginfrared	160		1				-1	3	5	a2	b2	2457	414	1	1	1	0	3		3	1		3.16227766	0.225876976
FI3	foraging	infrared	foraginginfrared	170		1				-1	20	5	a2	b2	2459	411	1	1	0	0						3.605551275	0.257539377
FI3	foraging	infrared	foraginginfrared	180		1				-1	20	5	a2	b2	2449	411	1	1	0	0						10	0.714285714
FI3	foraging	infrared	foraginginfrared	190		1				-1	3	5	a2	b2	2436	408	1	1	1	0	3		3	1		13.34166406	0.952976005
FI3	foraging	infrared	foraginginfrared	200		1					20	5	a2	b2	2439	432	1	0	0	0						24.18677324	1.72762666
FI3	foraging	infrared	foraginginfrared	210		1				-1	20	5	a2	b2	2428	405	1	1	0	0						29.15475947	2.08248282
FI3	foraging	infrared	foraginginfrared	220		1				-1	3	5	a2	b2	2425	408	1	1	1	0	3		3	1		4.242640687	0.303045763
FI3	foraging	infrared	foraginginfrared	230		1				-1	3	5	a2	b2	2427	414	1	1	1	0	3		3	1		6.32455532	0.451753951
FI3	foraging	infrared	foraginginfrared	240		1				-1	3	5	a2	b2	2347	408	1	1	1	0	3		3	1		80.22468448	5.730334606
FI3	foraging	infrared	foraginginfrared	60						-1	6	6	a	b1	1273.81604	550.1755981	1	1	1	0	6		6	1		0	0
FI3	foraging	infrared	foraginginfrared	70						-1	6	6	a	b	1271.921509	548.6541748	1	1	1	0	6		6	1		2.429809986	0.173557856
FI3	foraging	infrared	foraginginfrared	80						6	6	6	a	b	1267.4646	548.0006714	1	1	1	1	6	6	6	1	1	4.504564854	0.321754632
FI3	foraging	infrared	foraginginfrared	90						6	6	6	a	b	1249.99353	558.479187	1	1	1	1	6	6	6	1	1	20.37247104	1.455176503
FI3	foraging	infrared	foraginginfrared	100					c5	6	20	6	a1	b1	1233.751709	493.0896301	1	1	0	1		6	6	0	1	67.37648626	4.812606162
FI3	foraging	infrared	foraginginfrared	110						6	6	6	a1	b	1210.740234	461.112854	1	1	1	1	6	6	6	1	1	39.39596669	2.813997621
FI3	foraging	infrared	foraginginfrared	120						6	20	6	a1	b1	1200.365845	478.6966858	1	1	0	1		6	6	0	1	20.41614772	1.458296266
FI3	foraging	infrared	foraginginfrared	130						6	6	6	a	b1	1232.977295	465.1403503	1	1	1	1	6	6	6	1	1	35.31686429	2.522633164
FI3	foraging	infrared	foraginginfrared	140						6	6	6	a	b	1271.046875	464.4187317	1	1	1	1	6	6	6	1	1	38.07641862	2.719744187
FI3	foraging	infrared	foraginginfrared	150						6	6	6	a	b1	1284.51416	457.9557495	1	1	1	1	6	6	6	1	1	14.93780118	1.066985799
FI3	foraging	infrared	foraginginfrared	160						6	6	6	a	b	1307.887939	460.8300781	1	1	1	1	6	6	6	1	1	23.54984734	1.682131953
FI3	foraging	infrared	foraginginfrared	170						6	6	6	a	b	1320.687012	478.3153687	1	1	1	1	6	6	6	1	1	21.66914066	1.547795762
FI3	foraging	infrared	foraginginfrared	180						6	6	6	a1	b	1367.900146	485.2260437	1	1	1	1	6	6	6	1	1	47.7162179	3.408301279
FI3	foraging	infrared	foraginginfrared	190						6	20	6	a2	b	1500.81604	484.9432678	1	1	0	1		6	6	0	1	132.9161948	9.494013914
FI3	foraging	infrared	foraginginfrared	200						6	6	6	a1	b	1609.782349	476.4360657	1	1	1	1	6	6	6	1	1	109.297891	7.806992217
FI3	foraging	infrared	foraginginfrared	210						6	6	6	a	b	1634.130981	457.1956787	1	1	1	1	6	6	6	1	1	31.03302067	2.216644334
FI3	foraging	infrared	foraginginfrared	220						6	6	6	a	b	1644.299683	465.3997192	1	1	1	1	6	6	6	1	1	13.06555704	0.933254075
FI3	foraging	infrared	foraginginfrared	230						6	6	6	a2	b	1689.378662	478.1736755	1	1	1	1	6	6	6	1	1	46.85390386	3.346707419
FI3	foraging	infrared	foraginginfrared	240						6	20	6	a2	b	1804.586914	489.5608215	1	1	0	1		6	6	0	1	115.7696352	8.269259654
FI3	foraging	infrared	foraginginfrared	60						-1	7	7	a	b	2183.933594	698.5245972	1	1	1	0	7		7	1		0	0
FI3	foraging	infrared	foraginginfrared	70						-1	7	7	a	b	2167.735596	700.7969971	1	1	1	0	7		7	1		16.35661764	1.168329831
FI3	foraging	infrared	foraginginfrared	80						7	7	7	a	b	2185.450928	696.617981	1	1	1	1	7	7	7	1	1	18.20157036	1.300112168
FI3	foraging	infrared	foraginginfrared	90						7	7	7	a	b	2164.085693	700.9863281	1	1	1	1	7	7	7	1	1	21.80724015	1.557660011
FI3	foraging	infrared	foraginginfrared	100						7	7	7	a	b	2150.716064	717.4981689	1	1	1	1	7	7	7	1	1	21.24589057	1.517563612
FI3	foraging	infrared	foraginginfrared	110							7	7	a	b1	2115	717	1	0	1	0	7		7	1		35.71953807	2.551395576
FI3	foraging	infrared	foraginginfrared	120							7	7	a	b1	2085	705	1	0	1	0	7		7	1		32.31098884	2.307927774
FI3	foraging	infrared	foraginginfrared	130						7	7	7	a	b1	2123.067139	699.5977783	1	1	1	1	7	7	7	1	1	38.44855096	2.746325069
FI3	foraging	infrared	foraginginfrared	140							7	7	a1	b1	2112	711	1	0	1	0	7		7	1		15.89000394	1.135000282
FI3	foraging	infrared	foraginginfrared	150							7	7	a1	b1	2133	747	1	0	1	0	7		7	1		41.67733197	2.976952283
FI3	foraging	infrared	foraginginfrared	160							7	7	a	b	2115	780	1	0	1	0	7		7	1		37.58989226	2.684992304
FI3	foraging	infrared	foraginginfrared	170							7	7	a	b	2109	774	1	0	1	0	7		7	1		8.485281374	0.606091527
FI3	foraging	infrared	foraginginfrared	180							7	7	a1	b	2073	750	1	0	1	0	7		7	1		43.26661531	3.090472522
FI3	foraging	infrared	foraginginfrared	200							7	7	a	b	2067	732	1	0	1	0	7		7	1		18.97366596	1.355261854
FI3	foraging	infrared	foraginginfrared	210							7	7	a	b1	2058	726	1	0	1	0	7		7	1		10.81665383	0.77261813
FI3	foraging	infrared	foraginginfrared	220							7	7	a1	b1	2052	714	1	0	1	0	7		7	1		13.41640786	0.958314847
FI3	foraging	infrared	foraginginfrared	230							7	7	a	b	2061	723	1	0	1	0	7					12.72792206	0.90913729
FI3	foraging	infrared	foraginginfrared	240							7	7	a	b1	2070	726	1	0	1	0	7		7	1		9.486832981	0.677630927
FI3	foraging	infrared	foraginginfrared	60					c4	-1	20	8	a2	b2	1197.199463	625.2365112	1	1	0	0						0	0
FI3	foraging	infrared	foraginginfrared	70					c4	-1	20	8	a1	b2	1195.003296	623.7144775	1	1	0	0						2.672028457	0.190859176
FI3	foraging	infrared	foraginginfrared	80					c4	-1	20	8	a1	b2	1194.616089	621.9592896	1	1	0	0						1.797390838	0.12838506
FI3	foraging	infrared	foraginginfrared	90					c4	-1	20	8	a	b2	1191.929443	625.2957153	1	1	0	0						4.283667025	0.305976216
FI3	foraging	infrared	foraginginfrared	100						-1	20	8	a2	b1	1205.680664	636.0817871	1	1	0	0						17.4767109	1.248336493
FI3	foraging	infrared	foraginginfrared	110						-1	8	8	a1	b1	1243.09375	682.6936035	1	1	1	0	8		8	1		59.76956108	4.269254363
FI3	foraging	infrared	foraginginfrared	120					c5	-1	20	8	a1	b2	1288.061157	703.3037109	1	1	0	0						49.46558621	3.533256158
FI3	foraging	infrared	foraginginfrared	130					c4	-1	20	8	a	b2	1303.651978	669.0167847	1	1	0	0						37.66519624	2.69037116
FI3	foraging	infrared	foraginginfrared	140					c4	-1	20	8	a1	b2	1290.136475	664.8063965	1	1	0	0						14.15613613	1.011152581
FI3	foraging	infrared	foraginginfrared	150						-1	8	8	a	b	1285.928711	664.4608154	1	1	1	0	8		8	1		4.221931333	0.301566524
FI3	foraging	infrared	foraginginfrared	160						8	8	8	a	b1	1286.367432	659.730835	1	1	1	1	8	8	8	1	1	4.750283223	0.339305945
FI3	foraging	infrared	foraginginfrared	170						8	8	8	a1	b1	1285.586304	652.0685425	1	1	1	1	8	8	8	1	1	7.702005408	0.550143243
FI3	foraging	infrared	foraginginfrared	180						8	8	8	a	b1	1285.913452	656.993042	1	1	1	1	8	8	8	1	1	4.935354206	0.3525253
FI3	foraging	infrared	foraginginfrared	190						8	8	8	a1	b1	1267.632324	656.2341919	1	1	1	1	8	8	8	1	1	18.29687116	1.306919369
FI3	foraging	infrared	foraginginfrared	200						8	8	8	a1	b1	1234.323975	680.1146851	1	1	1	1	8	8	8	1	1	40.98443691	2.927459779
FI3	foraging	infrared	foraginginfrared	210						8	8	8	a1	b1	1237.30188	686.1068115	1	1	1	1	8	8	8	1	1	6.691300097	0.477950007
FI3	foraging	infrared	foraginginfrared	220						8	20	8	a2	b2	1245.261963	693.5316772	1	1	0	1		8	8	0	1	10.88538249	0.777527321
FI3	foraging	infrared	foraginginfrared	230						8	8	8	a1	b2	1248.619995	694.2936401	1	1	1	1	8	8	8	1	1	3.4433946	0.245956757
FI3	foraging	infrared	foraginginfrared	240						8	20	8	a2	b2	1244.439453	691.6605225	1	1	0	1		8	8	0	1	4.94067199	0.352905142
FI3	foraging	infrared	foraginginfrared	60						-1	9	9	a2	b1	2842.088135	448.5717773	1	1	1	0	9		9	1		0	0
FI3	foraging	infrared	foraginginfrared	70						-1	9	9	a1	b1	2845.284912	447.5021057	1	1	1	0	9		9	1		3.370991029	0.240785074
FI3	foraging	infrared	foraginginfrared	80						-1	9	9	a	b1	2845.098633	446.2145996	1	1	1	0	9		9	1		1.30091192	0.09292228
FI3	foraging	infrared	foraginginfrared	90						-1	9	9	a	b1	2846.330811	448.0128174	1	1	1	0	9		9	1		2.179873822	0.155705273
FI3	foraging	infrared	foraginginfrared	100						9	9	9	a	b1	2845.931885	446.4364014	1	1	1	1	9	9	9	1	1	1.626108655	0.116150618
FI3	foraging	infrared	foraginginfrared	110						9	9	9	a	b1	2843.07251	445.8437195	1	1	1	1	9	9	9	1	1	2.92015363	0.208582402
FI3	foraging	infrared	foraginginfrared	120						9	9	9	a1	b1	2842.181152	450.0973511	1	1	1	1	9	9	9	1	1	4.346021269	0.310430091
FI3	foraging	infrared	foraginginfrared	130						9	9	9	a	b1	2842.585449	445.8873901	1	1	1	1	9	9	9	1	1	4.229329461	0.302094961
FI3	foraging	infrared	foraginginfrared	140						9	9	9	a	b	2845.91626	443.3964844	1	1	1	1	9	9	9	1	1	4.159196211	0.297085444
FI3	foraging	infrared	foraginginfrared	150						9	9	9	a	b	2849.243164	443.1468201	1	1	1	1	9	9	9	1	1	3.336258756	0.238304197
FI3	foraging	infrared	foraginginfrared	160						9	20	9	a2	b2	2849.081787	450.3550415	1	1	0	1		9	9	0	1	7.21002762	0.515001973
FI3	foraging	infrared	foraginginfrared	170						9	9	9	a1	b1	2847.63501	452.3559875	1	1	1	1	9	9	9	1	1	2.469199988	0.176371428
FI3	foraging	infrared	foraginginfrared	180						9	9	9	a1	b1	2840.561035	448.0223999	1	1	1	1	9	9	9	1	1	8.295848588	0.592560613
FI3	foraging	infrared	foraginginfrared	190						9	9	9	a	b	2842.620605	450.1844788	1	1	1	1	9	9	9	1	1	2.986036462	0.213288319
FI3	foraging	infrared	foraginginfrared	200						9	9	9	a1	b1	2845.562744	455.6690674	1	1	1	1	9	9	9	1	1	6.223897011	0.444564072
FI3	foraging	infrared	foraginginfrared	210						9	9	9	a1	b2	2842.616455	450.8682861	1	1	1	1	9	9	9	1	1	5.632771961	0.402340854
FI3	foraging	infrared	foraginginfrared	220						9	20	9	a2	b2	2838.132568	452.5834351	1	1	0	1		9	9	0	1	4.800726895	0.342909064
FI3	foraging	infrared	foraginginfrared	230						9	9	9	a1	b1	2842.403564	458.9615479	1	1	1	1	9	9	9	1	1	7.676049096	0.548289221
FI3	foraging	infrared	foraginginfrared	240						9	20	9	a2	b2	2851.683838	461.1921082	1	1	0	1		9	9	0	1	9.544573577	0.681755256
FI3	foraging	infrared	foraginginfrared	60					c5	-1	20	10	a2	b	1850.459351	1962.865112	1	1	0	0						0	0
FI3	foraging	infrared	foraginginfrared	70					c5	-1	20	10	a2	b1	1505.942749	1950.189575	1	1	0	0						344.7497038	24.62497885
FI3	foraging	infrared	foraginginfrared	80						-1	10	10	a1	b	1172.916748	1950.701416	1	1	1	0	10		10	1		333.0263943	23.7875996
FI3	foraging	infrared	foraginginfrared	90						-1	10	10	a	b	1074.118896	1862.578003	1	1	1	0	10		10	1		132.388638	9.456331288
FI3	foraging	infrared	foraginginfrared	100					c5	-1	20	10	a2	b	950.4627075	1936.606201	1	1	0	0						144.1215704	10.29439789
FI3	foraging	infrared	foraginginfrared	110						-1	10	10	a1	b	901.600647	1911.869263	1	1	1	0	10		10	1		54.76693398	3.911923856
FI3	foraging	infrared	foraginginfrared	120					c5	-1	20	10	a2	b1	884.1808472	1668.856812	1	1	0	0						243.6360006	17.40257147
FI3	foraging	infrared	foraginginfrared	120						-1	17	10	a2	b	933.5220947	1869.933228	1	1	1	0	17		15	0		207.041744	14.788696
FI3	foraging	infrared	foraginginfrared	130					c5	-1	20	10	a2	b2	905.6705933	1307.418823	1	1	0	0						563.2034818	40.22882013
FI3	foraging	infrared	foraginginfrared	140					c5	-1	20	10	a2	b	949.9476318	933.1495972	1	1	0	0						376.879171	26.91994078
FI3	foraging	infrared	foraginginfrared	150						-1	10	10	a	b	915.3480225	587.0509644	1	1	1	0	10		10	1		347.8238011	24.84455722
FI3	foraging	infrared	foraginginfrared	160						-1	10	10	a	b1	986.0718384	449.1592407	1	1	1	0	10		10	1		154.9709186	11.06935133
FI3	foraging	infrared	foraginginfrared	170					c5	-1	20	10	a2	b2	1100.223389	426.0278931	1	1	0	0						116.4716092	8.319400656
FI3	foraging	infrared	foraginginfrared	180					c5	-1	20	10	a1	b1	1302.503784	419.503479	1	1	0	0						202.3855879	14.45611342
FI3	foraging	infrared	foraginginfrared	190						-1	10	10	a1	b	1445.693604	413.922699	1	1	1	0	10		10	1		143.2985333	10.23560952
FI3	foraging	infrared	foraginginfrared	200						-1	10	10	a2	b	1570.084229	418.076355	1	1	1	0	10		10	1		124.4599552	8.889996799
FI3	foraging	infrared	foraginginfrared	210						-1	10	10	a1	b1	1614.38208	393.3094482	1	1	1	0	10		10	1		50.75134753	3.625096252
FI3	foraging	infrared	foraginginfrared	220						-1	10	10	a1	b1	1692.265747	391.3390808	1	1	1	0	10		10	1		77.90858703	5.564899074
FI3	foraging	infrared	foraginginfrared	230						-1	10	10	a1	b1	1776.540283	413.8060913	1	1	1	0	10		10	1		87.21791088	6.229850777
FI3	foraging	infrared	foraginginfrared	240						-1	10	10	a1	b	1813.216309	385.5704651	1	1	1	0	10		10	1		46.28586685	3.306133346
FI3	foraging	infrared	foraginginfrared	60						-1	20	12	a2	b1	1812.827881	526.4896851	1	1	0	0						0	0
FI3	foraging	infrared	foraginginfrared	70					c1	-1	20	12	a2	b1	1888.774902	381.5826721	1	1	0	0						163.6031553	11.68593966
FI3	foraging	infrared	foraginginfrared	80							20	12	a2	b	1965	360	1	0		0						79.22169715	5.658692654
FI3	foraging	infrared	foraginginfrared	90							20	12	a2	b1	2004	363	1	0	0	0						39.11521443	2.793943888
FI3	foraging	infrared	foraginginfrared	100							12	12	a	b1	2022	342	1	0	1	0	12		12	1		27.65863337	1.975616669
FI3	foraging	infrared	foraginginfrared	110				1	c1		20	12	a1	b	2022	330	1	0	0	0						12	0.857142857
FI3	foraging	infrared	foraginginfrared	160						-1	12	12	a	b1	2195.951416	395.3813171	1	1	1	0	12		12	1		185.8327521	13.27376801
FI3	foraging	infrared	foraginginfrared	170							12	12	a	b	2229	399	1	0	1	0	12		12	1		33.2461091	2.374722079
FI3	foraging	infrared	foraginginfrared	180						-1	12	12	a1	b1	2206.612305	362.8900146	1	1	1	0	12					42.48693838	3.034781313
FI3	foraging	infrared	foraginginfrared	190				1	c1		20	12	a1	b2	2175	345	1	0	0	0						36.32341462	2.594529616
FI3	foraging	infrared	foraginginfrared	60						-1	13	13	a1	b	3025.595703	1089.352051	1	1	1	0	13		13	1		0	0
FI3	foraging	infrared	foraginginfrared	70					c5	-1	20	13	a2	b1	2971.667969	907.7737427	1	1	0	0						189.4172182	13.5298013
FI3	foraging	infrared	foraginginfrared	80						-1	13	13	a	b	2990.850098	856.0161133	1	1	1	0	13		13	1		55.19788288	3.94270592
FI3	foraging	infrared	foraginginfrared	90						-1	13	13	a	b	2997.53125	829.0961914	1	1	1	0	13		13	1		27.73661816	1.981187012
FI3	foraging	infrared	foraginginfrared	100						-1	13	13	a	b1	2998.11499	825.1080322	1	1	1	0	13		13	1		4.030653321	0.287903809
FI3	foraging	infrared	foraginginfrared	110						-1	13	13	a1	b	3013.483154	782.7644043	1	1	1	0	13		13	1		45.04623501	3.217588215
FI3	foraging	infrared	foraginginfrared	120						-1	13	13	a1	b	3025.555176	690.8331299	1	1	1	0	13		13	1		92.72050975	6.622893553
FI3	foraging	infrared	foraginginfrared	130						-1	13	13	a1	b	3048.905518	588.4125366	1	1	1	0	13		13	1		105.0486383	7.503474163
FI3	foraging	infrared	foraginginfrared	140						-1	13	13	a	b	3043.936279	546.3979492	1	1	1	0	13		13	1		42.30743304	3.021959503
FI3	foraging	infrared	foraginginfrared	150						-1	13	13	a	b	3032.42041	532.4334106	1	1	1	0	13		13	1		18.10037506	1.292883933
FI3	foraging	infrared	foraginginfrared	160						-1	20	13	a1	b	3027.073486	521.9609985	1	1	0	0						11.75844426	0.839888876
FI3	foraging	infrared	foraginginfrared	170						-1	13	13	a1	b	3001.163086	517.0690308	1	1	1	0	13		13	1		26.36816596	1.883440426
FI3	foraging	infrared	foraginginfrared	180						-1	13	13	a1	b	2981.187256	485.6623535	1	1	1	0	13		13	1		37.22113866	2.658652761
FI3	foraging	infrared	foraginginfrared	190						-1	13	13	a	b	2968.397217	460.5728455	1	1	1	0	13		13	1		28.16147207	2.011533719
FI3	foraging	infrared	foraginginfrared	200						-1	13	13	a	b	2976.310303	463.0523071	1	1	1	0	13		13	1		8.292445952	0.592317568
FI3	foraging	infrared	foraginginfrared	210						-1	13	13	a1	b	2984.372803	434.2788391	1	1	1	0	13		13	1		29.88170623	2.134407588
FI3	foraging	infrared	foraginginfrared	220						-1	13	13	a	b	2969.289307	423.13974	1	1	1	0	13		13	1		18.75077013	1.339340723
FI3	foraging	infrared	foraginginfrared	230						-1	20	13	a2	b	2948.432861	420.2956543	1	1	0	0						21.04946943	1.503533531
FI3	foraging	infrared	foraginginfrared	240						-1	13	13	a1	b	2915.743408	413.7800293	1	1	1	0	13		13	1		33.33247225	2.380890875
FI3	foraging	infrared	foraginginfrared	60						-1	20	14	a2	b1	2412.141602	664.3881226	1	1	0	0						0	0
FI3	foraging	infrared	foraginginfrared	70						-1	14	14	a	b1	2511.771973	602.8880005	1	1	1	0	14		14	1		117.0832005	8.363085751
FI3	foraging	infrared	foraginginfrared	80						14	14	14	a	b1	2506.414795	630.8914185	1	1	1	1	14	14	14	1	1	28.51123946	2.036517105
FI3	foraging	infrared	foraginginfrared	90						14	14	14	a	b1	2506.888428	625.189209	1	1	1	1	14	14	14	1	1	5.721845978	0.408703284
FI3	foraging	infrared	foraginginfrared	100						14	14	14	a1	b1	2508.177002	622.421875	1	1	1	1	14	14	14	1	1	3.052631721	0.218045123
FI3	foraging	infrared	foraginginfrared	110						14	20	14	a2	b2	2509.672363	628.715332	1	1	0	1		14	14	0	1	6.468671079	0.462047934
FI3	foraging	infrared	foraginginfrared	120						14	14	14	a1	b1	2517.1521	630.9630737	1	1	1	1	14	14	14	1	1	7.810173387	0.557869528
FI3	foraging	infrared	foraginginfrared	130						14	14	14	a1	b1	2519.25	635.3551025	1	1	1	1	14	14	14	1	1	4.867350551	0.347667897
FI3	foraging	infrared	foraginginfrared	140						14	20	14	a2	b1	2522.322998	634.4446411	1	1	0	1		14	14	0	1	3.205036142	0.228931153
FI3	foraging	infrared	foraginginfrared	150						14	20	14	a2	b2	2524.472168	630.1949463	1	1	0	1		14	14	0	1	4.762230316	0.340159308
FI3	foraging	infrared	foraginginfrared	160						14	20	14	a2	b2	2524.575195	630.9898071	1	1	0	1		14	14	0	1	0.801509984	0.057250713
FI3	foraging	infrared	foraginginfrared	170						14	20	14	a2	b2	2523.592529	635.9862061	1	1	0	1		14	14	0	1	5.092115026	0.363722502
FI3	foraging	infrared	foraginginfrared	180					c4	14	20	14	a1	b2	2510.687012	646.3572388	1	1	0	1		14	14	0	1	16.55628848	1.182592034
FI3	foraging	infrared	foraginginfrared	190					c4	14	20	14	a1	b2	2519.84668	635.8209839	1	1	0	1		14	14	0	1	13.96109542	0.997221101
FI3	foraging	infrared	foraginginfrared	200					c4	14	20	14	a	b2	2512.331299	633.9307251	1	1	0	1		14	14	0	1	7.749453523	0.553532395
FI3	foraging	infrared	foraginginfrared	210						14	20	14	a2	b2	2510.874756	633.6451416	1	1	0	1		14	14	0	1	1.484276068	0.106019719
FI3	foraging	infrared	foraginginfrared	220						14	20	14	a2	b1	2583.720703	696.4104614	1	1	0	1		14	14	0	1	96.15621334	6.868300953
FI3	foraging	infrared	foraginginfrared	230						14	20	14	a2	b1	2618.453369	770.8330688	1	1	0	1		14	14	0	1	82.12845171	5.866317979
FI3	foraging	infrared	foraginginfrared	240					c5	14	20	14	a2	b1	2595.531982	968.8112793	1	1	0	1		14	14	0	1	199.3006819	14.23576299
FI3	foraging	infrared	foraginginfrared	60					c5	-1	20	15	a2	b2	1192.915771	1201.944092	1	1	0	0						0	0
FI3	foraging	infrared	foraginginfrared	70					c5	-1	20	15	a2	b2	1388.550415	1566.828735	1	1	0	0						414.0213963	29.57295688
FI3	foraging	infrared	foraginginfrared	80						-1	15	15	a1	b	1373.111084	1895.769531	1	1	1	0	15		15	1		329.3029308	23.52163791
FI3	foraging	infrared	foraginginfrared	90						-1	15	15	a1	b	1389.623535	1930.310791	1	1	1	0	15		15	1		38.28524103	2.734660073
FI3	foraging	infrared	foraginginfrared	100					c5	-1	20	15	a2	b	1322.979248	1850.742065	1	1	0	0						103.7913443	7.413667448
FI3	foraging	infrared	foraginginfrared	110						-1	20	15	a2	b	1139.424561	1911.078369	1	1	0	0						193.2169576	13.80121126
FI3	foraging	infrared	foraginginfrared	130						-1	15	15	a1	b	909.9187622	1898.441284	1	1	1	0	15		15	1		229.8534481	16.41810344
FI3	foraging	infrared	foraginginfrared	140					c5	-1	20	15	a2	b	934.298584	1930.690674	1	1	0	0						40.42769925	2.887692803
FI3	foraging	infrared	foraginginfrared	150					c5	-1	20	15	a2	b2	1179.727539	1948.085083	1	1	0	0						246.0445842	17.57461316
FI3	foraging	infrared	foraginginfrared	160						-1	15	15	a	b1	1496.806763	1970.079956	1	1	1	0	15		15	1		317.841169	22.70294065
FI3	foraging	infrared	foraginginfrared	170						-1	15	15	a1	b	1869.657959	1967.151245	1	1	1	0	15		15	1		372.8626982	26.63304987
FI3	foraging	infrared	foraginginfrared	180					c5	-1	20	15	a2	b	2105.817383	1839.762695	1	1	0	0						268.3265105	19.16617932
FI3	foraging	infrared	foraginginfrared	190						-1	20	15	a2	b	2298.424561	1773.859131	1	1	0	0						203.570147	14.54072479
FI3	foraging	infrared	foraginginfrared	200						-1	20	15	a2	b	2399.196777	1842.886719	1	1	0	0						122.1468273	8.72477338
FI3	foraging	infrared	foraginginfrared	210						-1	15	15	a1	b	2440.242432	1870.247314	1	1	1	0	15		15	1		49.32897681	3.523498344
FI3	foraging	infrared	foraginginfrared	220					c5	-1	20	15	a2	b2	2587.686523	1940.865601	1	1	0	0						163.4830341	11.67735958
FI3	foraging	infrared	foraginginfrared	230					c5	-1	20	15	a2	b	2982.469971	1952.928833	1	1	0	0						394.9677106	28.21197933
FI3	foraging	infrared	foraginginfrared	240					c5	-1	20	15	a2	b2	3125.455322	1841.604126	1	1	0	0						181.2125851	12.94375608
FI3	foraging	infrared	foraginginfrared	60						-1	16	16	a	b1	2224.344238	486.8254395	1	1	1	0	16		16	1		0	0
FI3	foraging	infrared	foraginginfrared	70						-1	16	16	a	b	2138.523438	464.2749939	1	1	1	0	16		16	1		88.73405383	6.338146702
FI3	foraging	infrared	foraginginfrared	80						-1	16	16	a	b	2124.040039	396.288147	1	1	1	0	16		16	1		69.51244635	4.96517474
FI3	foraging	infrared	foraginginfrared	90						-1	16	16	a	b	2104.324219	390.6094055	1	1	1	0	16		16	1		20.5173503	1.465525021
FI3	foraging	infrared	foraginginfrared	100						-1	16	16	a	b	2105.394531	387.572113	1	1	1	0	16		16	1		3.22035922	0.230025659
FI3	foraging	infrared	foraginginfrared	110							16	16	a	b	2122	384	1	0	1	0	16		16	1		16.98533462	1.213238187
FI3	foraging	infrared	foraginginfrared	120						-1	16	16	a	b	2107.400391	385.7826233	1	1	1	0	16		16	1		14.7080362	1.050574014
FI3	foraging	infrared	foraginginfrared	130						-1	16	16	a	b	2120.768799	386.396637	1	1	1	0	16		16	1		13.38250146	0.955892961
FI3	foraging	infrared	foraginginfrared	140						-1	16	16	a	b	2106.765381	396.7846985	1	1	1	0	16		16	1		17.43581192	1.245415137
FI3	foraging	infrared	foraginginfrared	150						16	16	16	a	b1	2097.706299	433.1627197	1	1	1	1	16	16	16	1	1	37.4890303	2.677787879
FI3	foraging	infrared	foraginginfrared	160						16	16	16	a	b1	2093.724121	427.009552	1	1	1	1	16	16	16	1	1	7.329339286	0.523524235
FI3	foraging	infrared	foraginginfrared	170						16	16	16	a	b1	2089.441406	430.7391052	1	1	1	1	16	16	16	1	1	5.679015306	0.40564395
FI3	foraging	infrared	foraginginfrared	180						16	16	16	a1	b1	2093.948242	433.5236816	1	1	1	1	16	16	16	1	1	5.297682178	0.37840587
FI3	foraging	infrared	foraginginfrared	190						16	16	16	a1	b1	2096.022949	427.5390625	1	1	1	1	16	16	16	1	1	6.334040962	0.452431497
FI3	foraging	infrared	foraginginfrared	200						16	16	16	a1	b1	2092.831055	429.1725769	1	1	1	1	16	16	16	1	1	3.585604078	0.256114577
FI3	foraging	infrared	foraginginfrared	210						16	16	16	a1	b1	2092.036865	433.7830811	1	1	1	1	16	16	16	1	1	4.678406431	0.334171888
FI3	foraging	infrared	foraginginfrared	220						16	16	16	a1	b1	2064.57666	477.2232361	1	1	1	1	16	16	16	1	1	51.39173012	3.670837866
FI3	foraging	infrared	foraginginfrared	230						16	16	16	a	b	2062.163574	486.6038818	1	1	1	1	16	16	16	1	1	9.686046551	0.691860468
FI3	foraging	infrared	foraginginfrared	240						16	16	16	a1	b	2070.664551	485.6966553	1	1	1	1	16	16	16	1	1	8.549249667	0.610660691
FI3	foraging	infrared	foraginginfrared	60						-1	18	18	a1	b	2255.858643	557.8852539	1	1	1	0	18		18	1		0	0
FI3	foraging	infrared	foraginginfrared	70					c5	-1	20	18	a2	b	2149.692139	590.5783081	1	1	0	0						111.0862834	7.93473453
FI3	foraging	infrared	foraginginfrared	80					c5	-1	20	18	a2	b	1995.489014	513.217041	1	1	0	0						172.5206347	12.32290248
FI3	foraging	infrared	foraginginfrared	90					c5	-1	20	18	a2	b	1850.849731	485.7329102	1	1	0	0						147.2273739	10.51624099
FI3	foraging	infrared	foraginginfrared	100						-1	20	18	a2	b	1648.424072	546.7512207	1	1	0	0						211.4222827	15.10159162
FI3	foraging	infrared	foraginginfrared	110					c5	-1	20	18	a1	b1	1437.420898	619.3270264	1	1	0	0						223.135804	15.93827171
FI3	foraging	infrared	foraginginfrared	120						-1	18	18	a1	b	1323.523193	560.0800171	1	1	1	0	18		18	1		128.3857286	9.170409188
FI3	foraging	infrared	foraginginfrared	130						-1	18	18	a1	b1	1359.430176	568.1986084	1	1	1	0	18		18	1		36.81335292	2.629525208
FI3	foraging	infrared	foraginginfrared	140						-1	18	18	a1	b	1348.586182	560.6981201	1	1	1	0	18		18	1		13.1852012	0.941800086
FI3	foraging	infrared	foraginginfrared	150						-1	20	18	a2	b	1306.744751	557.2073975	1	1	0	0						41.9867895	2.999056393
FI3	foraging	infrared	foraginginfrared	160						-1	18	18	a2	b1	1220.672119	533.2590942	1	1	1	0	18		18	1		89.34214689	6.38158192
FI3	foraging	infrared	foraginginfrared	170						-1	18	18	a1	b	1122.632568	519.2592163	1	1	1	0	18		18	1		99.03408576	7.073863268
FI3	foraging	infrared	foraginginfrared	180						-1	18	18	a1	b	1075.662231	488.7801514	1	1	1	0	18		18	1		55.99273127	3.999480805
FI3	foraging	infrared	foraginginfrared	190						-1	18	18	a1	b1	1004.402588	454.7373657	1	1	1	0	18		18	1		78.97371701	5.640979787
FI3	foraging	infrared	foraginginfrared	200						-1	20	18	a2	b	965.7505493	458.5588379	1	1	0	0						38.84049106	2.77432079
FI3	foraging	infrared	foraginginfrared	210					c4	-1	20	18	a1	b2	1124.762939	482.7290649	1	1	0	0						160.8388633	11.48849024
FI3	foraging	infrared	foraginginfrared	220					c5	-1	20	18	a2	b2	1349.328125	487.0956116	1	1	0	0						224.6076345	16.04340247
FI3	foraging	infrared	foraginginfrared	230					c5	-1	20	18	a1	b1	1529.469727	478.6203918	1	1	0	0						180.3408609	12.88149007
FI3	foraging	infrared	foraginginfrared	240					c5	-1	20	18	a2	b1	1655.152954	465.014679	1	1	0	0						126.4175184	9.029822746
FI3	foraging	infrared	foraginginfrared	60						-1	20	19	a1	b1	1083.85498	701.0256348	1	1	0	0						0	0
FI3	foraging	infrared	foraginginfrared	70						19	19	19	a	b1	1093.470093	701.0629883	1	1	1	1	19	19	19	1	1	9.615185557	0.686798968
FI3	foraging	infrared	foraginginfrared	80						19	19	19	a	b1	1083.344727	701.4902954	1	1	1	1	19	19	19	1	1	10.13437852	0.72388418
FI3	foraging	infrared	foraginginfrared	90						19	19	19	a	b1	1082.989624	700.234375	1	1	1	1	19	19	19	1	1	1.305156769	0.093225484
FI3	foraging	infrared	foraginginfrared	100						19	19	19	a	b1	1083.45166	700.1364136	1	1	1	1	19	19	19	1	1	0.472306787	0.033736199
FI3	foraging	infrared	foraginginfrared	110						19	19	19	a	b1	1081.963013	698.3656616	1	1	1	1	19	19	19	1	1	2.313359578	0.16523997
FI3	foraging	infrared	foraginginfrared	120						19	19	19	a	b1	1082.749634	701.4017334	1	1	1	1	19	19	19	1	1	3.136320228	0.224022873
FI3	foraging	infrared	foraginginfrared	130						19	19	19	a	b1	1082.472412	701.6251831	1	1	1	1	19	19	19	1	1	0.356064328	0.025433166
FI3	foraging	infrared	foraginginfrared	140						19	19	19	a	b1	1082.633179	701.9425049	1	1	1	1	19	19	19	1	1	0.355723422	0.025408816
FI3	foraging	infrared	foraginginfrared	150						19	19	19	a	b1	1082.335083	700.8154297	1	1	1	1	19	19	19	1	1	1.165830061	0.083273576
FI3	foraging	infrared	foraginginfrared	160						19	19	19	a	b1	1084.170898	699.4927368	1	1	1	1	19	19	19	1	1	2.262682749	0.161620196
FI3	foraging	infrared	foraginginfrared	170						19	19	19	a	b1	1083.256104	698.9256592	1	1	1	1	19	19	19	1	1	1.076301569	0.076878683
FI3	foraging	infrared	foraginginfrared	180						19	19	19	a	b1	1083.554565	701.1887207	1	1	1	1	19	19	19	1	1	2.282657732	0.163046981
FI3	foraging	infrared	foraginginfrared	190						19	19	19	a	b1	1083.259399	701.8122559	1	1	1	1	19	19	19	1	1	0.68986891	0.049276351
FI3	foraging	infrared	foraginginfrared	200						19	19	19	a	b1	1092.794067	700.7214355	1	1	1	1	19	19	19	1	1	9.596863186	0.685490228
FI3	foraging	infrared	foraginginfrared	210						19	19	19	a	b1	1083.339844	700.4568481	1	1	1	1	19	19	19	1	1	9.457924668	0.675566048
FI3	foraging	infrared	foraginginfrared	220						19	19	19	a	b1	1081.78479	700.5291138	1	1	1	1	19	19	19	1	1	1.556732242	0.11119516
FI3	foraging	infrared	foraginginfrared	230						19	19	19	a	b1	1081.771484	699.1182861	1	1	1	1	19	19	19	1	1	1.410890445	0.100777889
FI3	foraging	infrared	foraginginfrared	240						19	19	19	a	b1	1082.013428	696.0795288	1	1	1	1	19	19	19	1	1	3.0483738	0.217740986
FI4	foraging	infrared	foraginginfrared	60						-1	20	0	a2	b1	3161.106445	1176.94165	1	1	0	0						0	0
FI4	foraging	infrared	foraginginfrared	70					c5	-1	20	0	a2	b	3160.534912	1275.047119	1	1	0	0						98.10713378	7.007652413
FI4	foraging	infrared	foraginginfrared	80						-1	0	0	a1	b	3116.158447	1625.837158	1	1	1	0	0		0	1		353.5858059	25.25612899
FI4	foraging	infrared	foraginginfrared	90					c5	-1	20	0	a1	b	3185.0625	1704.678833	1	1	0	0						104.7080619	7.479147282
FI4	foraging	infrared	foraginginfrared	100					c5	-1	20	0	a2	b	3171.676025	1845.549805	1	1	0	0						141.5055775	10.10754125
FI4	foraging	infrared	foraginginfrared	110						-1	20	0	a2	b1	3126.870117	1973.819458	1	1	0	0						135.8700603	9.705004304
FI4	foraging	infrared	foraginginfrared	120						-1	20	0	a2	b1	3034.15332	1973.405029	1	1	0	0						92.71772321	6.622694515
FI4	foraging	infrared	foraginginfrared	130					c5	-1	20	0	a1	b2	2827.23291	1929.223877	1	1	0	0						211.58457	15.11318357
FI4	foraging	infrared	foraginginfrared	140						-1	20	0	a2	b1	2894.400146	1967.294434	1	1	0	0						77.20624911	5.51473208
FI4	foraging	infrared	foraginginfrared	150					c5	-1	20	0	a2	b2	2836.836914	2006.681641	1	1	0	0						69.74867564	4.98204826
FI4	foraging	infrared	foraginginfrared	160					c5	-1	20	0	a2	b1	2568.871826	2010.462769	1	1	0	0						267.9917635	19.14226882
FI4	foraging	infrared	foraginginfrared	170					c5	-1	20	0	a	b2	2228.988037	2000.435547	1	1	0	0						340.0316679	24.28797628
FI4	foraging	infrared	foraginginfrared	180					c5	-1	20	0	a2	b2	1893.141724	1997.397583	1	1	0	0						335.860053	23.99000378
FI4	foraging	infrared	foraginginfrared	190					c5	-1	20	0	a2	b2	1488.275879	1998.990845	1	1	0	0						404.86898	28.91921285
FI4	foraging	infrared	foraginginfrared	200					c5	-1	20	0	a2	b2	1173.358032	1997.137939	1	1	0	0						314.923298	22.49452129
FI4	foraging	infrared	foraginginfrared	210						-1	20	0	a2	b	911.4754028	1998.426636	1	1	0	0						261.8858	18.70612857
FI4	foraging	infrared	foraginginfrared	220						-1	20	0	a2	b	884.8685913	1895.053101	1	1	0	0						106.7427288	7.62448063
FI4	foraging	infrared	foraginginfrared	230					c5	-1	20	0	a2	b2	863.1824341	1563.934692	1	1	0	0						331.827802	23.70198586
FI4	foraging	infrared	foraginginfrared	240					c5	-1	20	0	a2	b2	861.8607178	1174.768188	1	1	0	0						389.1687484	27.79776775
FI4	foraging	infrared	foraginginfrared	60					c5	-1	20	1	a2	b2	1763.244263	1936.603027	1	1	0	0						0	0
FI4	foraging	infrared	foraginginfrared	70						-1	1	1	a1	b1	1966.503784	1918.896729	1	1	1	0	1		20	0		204.029277	14.57351978
FI4	foraging	infrared	foraginginfrared	80						-1	20	1	a2	b2	1966.991821	1902.823975	1	1	0	0						16.08016173	1.148582981
FI4	foraging	infrared	foraginginfrared	90					c5	-1	20	1	a1	b2	1972.970215	1901.259277	1	1	0	0						6.179763317	0.441411665
FI4	foraging	infrared	foraginginfrared	100					c4	-1	20	1	a	b2	1964.637939	1901.974243	1	1	0	0						8.362894219	0.597349587
FI4	foraging	infrared	foraginginfrared	110					c4		20	1	a	b2	1992	1879	1	0	0	0						35.72811531	2.552008236
FI4	foraging	infrared	foraginginfrared	120					c5	-1	20	1	a	b2	1990.862183	1869.020264	1	1	0	0						10.04438939	0.717456385
FI4	foraging	infrared	foraginginfrared	130					c4	-1	20	1	a	b2	1978.139648	1900.121216	1	1	0	0						33.60256109	2.400182935
FI4	foraging	infrared	foraginginfrared	140					c4		20	1	a	b2	1982	1884	1	0	0	0						16.57696965	1.184069261
FI4	foraging	infrared	foraginginfrared	150					c5		20	1	a	b2	1971	1894	1	0	0	0						14.86606875	1.061862053
FI4	foraging	infrared	foraginginfrared	160					c4		20	1	a	b2	1982	1899	1	0	0	0						12.08304597	0.863074712
FI4	foraging	infrared	foraginginfrared	170					c4		20	1	a	b2	1988	1897	1	0	0	0						6.32455532	0.451753951
FI4	foraging	infrared	foraginginfrared	180					c4		20	1	a	b2	1977	1883	1	0	0	0						17.80449381	1.271749558
FI4	foraging	infrared	foraginginfrared	190					c5		20	1	a	b2	1988	1881	1	0	0	0						11.18033989	0.798595706
FI4	foraging	infrared	foraginginfrared	200					c5		20	1	a	b2	1981	1877	1	0	0	0						8.062257748	0.575875553
FI4	foraging	infrared	foraginginfrared	210					c4		20	1	a	b2	1982	1881	1	0	0	0						4.123105626	0.294507545
FI4	foraging	infrared	foraginginfrared	220					c4		20	1	a	b2	1982	1886	1	0	0	0						5	0.357142857
FI4	foraging	infrared	foraginginfrared	230					c4	-1	20	1	a	b2	1973.005127	1895.605347	1	1	0	0						13.15942367	0.939958833
FI4	foraging	infrared	foraginginfrared	240					c4	-1	20	1	a	b2	1971.281738	1884.63208	1	1	0	0						11.10777468	0.793412477
FI4	foraging	infrared	foraginginfrared	60						-1	2	2	a2	b1	3076.325928	1238.977783	1	1	1	0	2		2	1		0	0
FI4	foraging	infrared	foraginginfrared	70					c5	-1	20	2	a2	b1	2995.081543	1204.27417	1	1	0	0						88.34585927	6.310418519
FI4	foraging	infrared	foraginginfrared	80					c5	-1	20	2	a2	b2	2830.185791	1069.019165	1	1	0	0						213.271014	15.23364386
FI4	foraging	infrared	foraginginfrared	90					c5	-1	20	2	a2	b	2756.918701	884.5307007	1	1	0	0						198.504559	14.17889707
FI4	foraging	infrared	foraginginfrared	100						-1	20	2	a2	b	2679.900391	717.5634766	1	1	0	0						183.8746149	13.13390106
FI4	foraging	infrared	foraginginfrared	110						-1	2	2	a1	b1	2533.793701	621.309021	1	1	1	0	2		2	1		174.9630964	12.49736403
FI4	foraging	infrared	foraginginfrared	120					c5	-1	20	2	a2	b	2323.878418	561.3477173	1	1	0	0						218.311209	15.59365779
FI4	foraging	infrared	foraginginfrared	130						-1	20	2	a2	b	2139.648682	578.8460693	1	1	0	0						185.058877	13.21849121
FI4	foraging	infrared	foraginginfrared	140						-1	20	2	a2	b	2023.731934	601.5324707	1	1	0	0						118.1158976	8.436849831
FI4	foraging	infrared	foraginginfrared	150						-1	2	2	a2	b	1840.717773	620.46698	1	1	1	0	2		2	1		183.991029	13.14221636
FI4	foraging	infrared	foraginginfrared	160						-1	2	2	a	b	1705.245483	623.7592163	1	1	1	0	2		2	1		135.5122879	9.679449137
FI4	foraging	infrared	foraginginfrared	170						-1	2	2	a	b	1709.104614	625.8761597	1	1	1	0	2		2	1		4.401629407	0.3144021
FI4	foraging	infrared	foraginginfrared	180						-1	2	2	a	b	1713.654419	613.0292358	1	1	1	0	2		2	1		13.62879963	0.973485688
FI4	foraging	infrared	foraginginfrared	200						-1	2	2	a	b	1613.269043	477.2439575	1	1	1	0	2		2	1		168.8634523	12.06167516
FI4	foraging	infrared	foraginginfrared	210						-1	2	2	a2	b	1502.058472	460.0607605	1	1	1	0	2		2	1		112.5302331	8.037873793
FI4	foraging	infrared	foraginginfrared	220						-1	2	2	a	b	1387.551758	460.4897461	1	1	1	0	2		2	1		114.5075176	8.179108398
FI4	foraging	infrared	foraginginfrared	230						-1	2	2	a	b	1307.712036	465.5379028	1	1	1	0	2		2	1		79.99915684	5.714225489
FI4	foraging	infrared	foraginginfrared	240						-1	2	2	a2	b	1230.940063	480.1062622	1	1	1	0	2		2	1		78.14200493	5.58157178
FI4	foraging	infrared	foraginginfrared	60					c5	-1	20	3	a2	b1	3102.227295	1832.653442	1	1	0	0						0	0
FI4	foraging	infrared	foraginginfrared	70						-1	20	3	a2	b1	3104.588867	1833.986938	1	1	0	0						2.712053446	0.193718103
FI4	foraging	infrared	foraginginfrared	80						-1	3	3	a2	b1	3101.969238	1835.475098	1	1	1	0	3		3	1		3.012818661	0.215201333
FI4	foraging	infrared	foraginginfrared	90							3	3	a1	b1	3095	1838	1	0	1	0	3		3	1		7.412517009	0.529465501
FI4	foraging	infrared	foraginginfrared	100						17	3	3	a1	b1	3094.977051	1832.949463	1	1	1	1	3	17	3	1	0	5.050589138	0.360756367
FI4	foraging	infrared	foraginginfrared	110						17	3	3	a1	b1	3094.363281	1835.990479	1	1	1	1	3	17	3	1	0	3.102336527	0.221595466
FI4	foraging	infrared	foraginginfrared	120						17	3	3	a1	b1	3095.568359	1836.046509	1	1	1	1	3	17	3	1	0	1.206379852	0.086169989
FI4	foraging	infrared	foraginginfrared	130						17	3	3	a1	b1	3095.364258	1835.938965	1	1	1	1	3	17	3	1	0	0.230700954	0.01647864
FI4	foraging	infrared	foraginginfrared	140						17	3	3	a1	b1	3094.415283	1835.67749	1	1	1	1	3	17	3	1	0	0.984338725	0.070309909
FI4	foraging	infrared	foraginginfrared	150						17	3	3	a1	b1	3095.194092	1836.024292	1	1	1	1	3	17	3	1	0	0.852534507	0.060895322
FI4	foraging	infrared	foraginginfrared	160						17	3	3	a1	b1	3094.562256	1836.137939	1	1	1	1	3	17	3	1	0	0.641975367	0.045855383
FI4	foraging	infrared	foraginginfrared	170						17	3	3	a1	b1	3093.960693	1835.485107	1	1	1	1	3	17	3	1	0	0.887731752	0.063409411
FI4	foraging	infrared	foraginginfrared	180						17	3	3	a1	b1	3093.860352	1836.383545	1	1	1	1	3	17	3	1	0	0.904023869	0.064573134
FI4	foraging	infrared	foraginginfrared	190						17	3	3	a1	b1	3093.866943	1835.695313	1	1	1	1	3	17	3	1	0	0.688263559	0.049161683
FI4	foraging	infrared	foraginginfrared	200						17	3	3	a1	b1	3094.429688	1836.171143	1	1	1	1	3	17	3	1	0	0.736950557	0.052639326
FI4	foraging	infrared	foraginginfrared	210						17	3	3	a1	b1	3094.116699	1836.095825	1	1	1	1	3	17	3	1	0	0.321923772	0.022994555
FI4	foraging	infrared	foraginginfrared	220						17	3	3	a1	b1	3093.345703	1836.00708	1	1	1	1	3	17	3	1	0	0.776086662	0.055434762
FI4	foraging	infrared	foraginginfrared	230						17	3	3	a1	b1	3094.491455	1835.761353	1	1	1	1	3	17	3	1	0	1.171806044	0.083700432
FI4	foraging	infrared	foraginginfrared	240						17	3	3	a1	b1	3094.259033	1836.217651	1	1	1	1	3	17	3	1	0	0.512081879	0.036577277
FI4	foraging	infrared	foraginginfrared	60					c5	-1	20	4	a2	b2	2272.001221	1846.984741	1	1	0	0						0	0
FI4	foraging	infrared	foraginginfrared	70					c	-1	20	4	a	b2	2272.358398	1847.618896	1	1	0	0						0.727824136	0.051987438
FI4	foraging	infrared	foraginginfrared	80					c	-1	20	4	a	b2	2273.931152	1848.635742	1	1	0	0						1.872840338	0.13377431
FI4	foraging	infrared	foraginginfrared	90					c	-1	20	4	a1	b2	2277.248779	1862.486572	1	1	0	0						14.24261706	1.01732979
FI4	foraging	infrared	foraginginfrared	100					c	-1	20	4	a1	b2	2281.51123	1862.687866	1	1	0	0						4.267201402	0.3048001
FI4	foraging	infrared	foraginginfrared	110					c	-1	20	4	a	b2	2287.882813	1862.186646	1	1	0	0						6.391266808	0.456519058
FI4	foraging	infrared	foraginginfrared	120					c	-1	20	4	a	b2	2280.628906	1848.953369	1	1	0	0						15.09101676	1.077929769
FI4	foraging	infrared	foraginginfrared	130					c	-1	20	4	a1	b2	2276.434814	1846.968262	1	1	0	0						4.640157056	0.33143979
FI4	foraging	infrared	foraginginfrared	140					c	-1	20	4	a	b2	2275.827148	1846.371704	1	1	0	0						0.851551182	0.060825084
FI4	foraging	infrared	foraginginfrared	150					c	-1	20	4	a1	b2	2282.757324	1848.669434	1	1	0	0						7.301157617	0.521511258
FI4	foraging	infrared	foraginginfrared	160					c	-1	20	4	a1	b2	2278.306641	1846.355591	1	1	0	0						5.016218555	0.358301325
FI4	foraging	infrared	foraginginfrared	170					c	-1	20	4	a	b2	2283.737549	1846.851685	1	1	0	0						5.453519136	0.389537081
FI4	foraging	infrared	foraginginfrared	180					c5	-1	20	4	a1	b2	2289.730713	1846.652222	1	1	0	0						5.99648232	0.428320166
FI4	foraging	infrared	foraginginfrared	190					c	-1	20	4	a1	b2	2309.331787	1842.986938	1	1	0	0						19.94082267	1.424344476
FI4	foraging	infrared	foraginginfrared	200					c5	-1	20	4	a	b2	2279.901367	1844.648071	1	1	0	0						29.47726216	2.105518725
FI4	foraging	infrared	foraginginfrared	210					c4	-1	20	4	a	b2	2273.942871	1860.777344	1	1	0	0						17.19468296	1.22819164
FI4	foraging	infrared	foraginginfrared	220					c4	-1	20	4	a	b2	2273.943115	1864.709106	1	1	0	0						3.931762008	0.280840143
FI4	foraging	infrared	foraginginfrared	230						-1	4	4	a1	b1	2317.44043	1870.384766	1	1	1	0	4		4	1		43.86604072	3.133288623
FI4	foraging	infrared	foraginginfrared	240						-1	4	4	a1	b1	2393.19873	1874.579346	1	1	1	0	4		4	1		75.87433374	5.419595267
FI4	foraging	infrared	foraginginfrared	60					c5	-1	20	5	a2	b2	2858.050293	2002.076538	1	1	0	0						0	0
FI4	foraging	infrared	foraginginfrared	70					c5	-1	20	5	a1	b2	2873.57666	2011.715332	1	1	0	0						18.27496709	1.305354792
FI4	foraging	infrared	foraginginfrared	80						-1	20	5	a2	b1	2901.654297	2010.202271	1	1	0	0						28.11837572	2.008455409
FI4	foraging	infrared	foraginginfrared	90						-1	20	5	a2	b2	2911.664063	2010.08374	1	1	0	0						10.01046777	0.715033412
FI4	foraging	infrared	foraginginfrared	100						-1	5	5	a1	b	2907.327148	2011.266602	1	1	1	0	5		5	1		4.495330269	0.321095019
FI4	foraging	infrared	foraginginfrared	110						-1	5	5	a1	b	2913.573486	2010.307861	1	1	1	0	5		5	1		6.319487536	0.451391967
FI4	foraging	infrared	foraginginfrared	120						-1	5	5	a1	b	2907.595459	2011.49646	1	1	1	0	5		5	1		6.095045069	0.435360362
FI4	foraging	infrared	foraginginfrared	130						-1	5	5	a	b1	2898.807861	2015.712646	1	1	1	0	5		5	1		9.74669703	0.696192645
FI4	foraging	infrared	foraginginfrared	140						-1	5	5	a	b1	2904.765137	2032.61377	1	1	1	0	5		5	1		17.92029938	1.280021384
FI4	foraging	infrared	foraginginfrared	150				1			5	5	a1	b	2914	2041	1	0	1	0	5		5	1		12.47443579	0.891031128
FI4	foraging	infrared	foraginginfrared	160					c5	-1	20	5	a2	b1	2908.925049	2038.442871	1	1	0	0						5.68278421	0.405913158
FI4	foraging	infrared	foraginginfrared	170					c5	-1	20	5	a2	b2	2908.215576	2036.258057	1	1	0	0						2.29712084	0.16408006
FI4	foraging	infrared	foraginginfrared	180					c5	-1	20	5	a2	b2	2906.88208	2034.453857	1	1	0	0						2.243512697	0.160250907
FI4	foraging	infrared	foraginginfrared	190					c5	-1	20	5	a2	b2	2903.868652	2037.844727	1	1	0	0						4.536380459	0.324027176
FI4	foraging	infrared	foraginginfrared	200					c5	-1	20	5	a2	b2	2903.114746	2036.731567	1	1	0	0						1.344432759	0.096030911
FI4	foraging	infrared	foraginginfrared	210					c5	-1	20	5	a2	b2	2899.358643	2037.308594	1	1	0	0						3.800167089	0.271440506
FI4	foraging	infrared	foraginginfrared	220					c5	-1	20	5	a2	b2	2905.577881	2034.836182	1	1	0	0						6.692663326	0.47804738
FI4	foraging	infrared	foraginginfrared	230					c5	-1	20	5	a2	b2	2903.701416	2037.460938	1	1	0	0						3.226525214	0.230466087
FI4	foraging	infrared	foraginginfrared	240					c5	-1	20	5	a2	b2	2908.8479	2032.610962	1	1	0	0						7.071673406	0.505119529
FI4	foraging	infrared	foraginginfrared	60						-1	20	7	a2	b1	3115.356689	449.51828	1	1	0	0						0	0
FI4	foraging	infrared	foraginginfrared	70						-1	7	7	a1	b1	3116.880859	447.8215027	1	1	1	0	7		7	1		2.280821649	0.162915832
FI4	foraging	infrared	foraginginfrared	80						-1	7	7	a	b1	3117.296143	447.2779846	1	1	1	0	7		7	1		0.684012226	0.048858016
FI4	foraging	infrared	foraginginfrared	90						-1	7	7	a1	b1	3119.836182	446.54953	1	1	1	0	7		7	1		2.642431499	0.188745107
FI4	foraging	infrared	foraginginfrared	100						-1	20	7	a1	b1	3115.512451	428.9613953	1	1	0	0						18.11179538	1.29369967
FI4	foraging	infrared	foraginginfrared	110						-1	20	7	a2	b1	3115.213135	422.440979	1	1	0	0						6.52728265	0.466234475
FI4	foraging	infrared	foraginginfrared	120					c4	-1	20	7	a1	b2	3095.759277	413.0089111	1	1	0	0						21.6198172	1.544272657
FI4	foraging	infrared	foraginginfrared	130					c5	-1	20	7	a1	b2	3024.659912	447.7487488	1	1	0	0						79.1326483	5.652332021
FI4	foraging	infrared	foraginginfrared	140					c4	-1	20	7	a1	b2	2988.432129	518.3358765	1	1	0	0						79.34100364	5.667214545
FI4	foraging	infrared	foraginginfrared	150					c4	-1	20	7	a	b2	2960.987305	563.6965942	1	1	0	0						53.01710172	3.786935837
FI4	foraging	infrared	foraginginfrared	160					c5	-1	20	7	a2	b2	2954.001953	564.6439819	1	1	0	0						7.049303939	0.50352171
FI4	foraging	infrared	foraginginfrared	170					c4	-1	20	7	a1	b2	2948.862305	593.4710693	1	1	0	0						29.28168283	2.091548774
FI4	foraging	infrared	foraginginfrared	180						-1	20	7	a2	b2	2941.22168	598.1607056	1	1	0	0						8.965034245	0.640359589
FI4	foraging	infrared	foraginginfrared	190						-1	20	7	a2	b2	2949.266113	592.3881836	1	1	0	0						9.901258129	0.707232723
FI4	foraging	infrared	foraginginfrared	200						-1	20	7	a2	b2	2955.650879	618.3324585	1	1	0	0						26.71835768	1.90845412
FI4	foraging	infrared	foraginginfrared	210						-1	20	7	a2	b1	2985.976318	647.2979126	1	1	0	0						41.9360201	2.995430007
FI4	foraging	infrared	foraginginfrared	220						-1	20	7	a2	b1	3037.746582	651.4036255	1	1	0	0						51.93281345	3.709486675
FI4	foraging	infrared	foraginginfrared	230						-1	7	7	a1	b1	3089.693115	621.7229004	1	1	1	0	7		7	1		59.82798453	4.273427467
FI4	foraging	infrared	foraginginfrared	240					c4	-1	20	7	a1	b2	3091.574707	611.7196655	1	1	0	0						10.1786589	0.727047064
FI4	foraging	infrared	foraginginfrared	60						-1	8	8	a1	b1	2519.696289	1952.957886	1	1	1	0	8		8	1		0	0
FI4	foraging	infrared	foraginginfrared	70						-1	8	8	a	b1	2519.254639	1962.471436	1	1	1	0	8		8	1		9.523795899	0.680271136
FI4	foraging	infrared	foraginginfrared	80						-1	8	8	a	b1	2518.772949	1962.522583	1	1	1	0	8		8	1		0.484397844	0.034599846
FI4	foraging	infrared	foraginginfrared	90						-1	8	8	a	b1	2518.060547	1962.401245	1	1	1	0	8		8	1		0.722661414	0.051618672
FI4	foraging	infrared	foraginginfrared	100						-1	8	8	a	b1	2519.355469	1952.544678	1	1	1	0	8		8	1		9.941264306	0.710090308
FI4	foraging	infrared	foraginginfrared	110						-1	8	8	a	b1	2519.622314	1952.687622	1	1	1	0	8		8	1		0.30271974	0.021622839
FI4	foraging	infrared	foraginginfrared	120						-1	8	8	a	b1	2519.838623	1952.937378	1	1	1	0	8		8	1		0.330405271	0.023600376
FI4	foraging	infrared	foraginginfrared	130						-1	8	8	a	b1	2519.427246	1952.679077	1	1	1	0	8		8	1		0.485747303	0.034696236
FI4	foraging	infrared	foraginginfrared	140						-1	8	8	a	b1	2519.580811	1952.769409	1	1	1	0	8		8	1		0.17816307	0.012725934
FI4	foraging	infrared	foraginginfrared	150						-1	8	8	a	b1	2518.124023	1962.791992	1	1	1	0	8		8	1		10.12790212	0.72342158
FI4	foraging	infrared	foraginginfrared	160						-1	8	8	a	b1	2511.681396	1948.845947	1	1	1	0	8		8	1		15.36227893	1.097305638
FI4	foraging	infrared	foraginginfrared	170						-1	8	8	a	b1	2520.511475	1952.678711	1	1	1	0	8		8	1		9.626025921	0.68757328
FI4	foraging	infrared	foraginginfrared	180						-1	8	8	a	b1	2521.012207	1952.154419	1	1	1	0	8		8	1		0.724992853	0.051785204
FI4	foraging	infrared	foraginginfrared	200						-1	8	8	a	b1	2519.427734	1952.597046	1	1	1	0	8		8	1		1.645136271	0.117509734
FI4	foraging	infrared	foraginginfrared	210						-1	8	8	a	b1	2518.331543	1952.519897	1	1	1	0	8		8	1		1.098902487	0.078493035
FI4	foraging	infrared	foraginginfrared	220						-1	8	8	a	b1	2519.343262	1952.578003	1	1	1	0	8		8	1		1.013386226	0.07238473
FI4	foraging	infrared	foraginginfrared	230						-1	8	8	a	b1	2519.403809	1952.848145	1	1	1	0	8		8	1		0.276844071	0.019774576
FI4	foraging	infrared	foraginginfrared	240						-1	8	8	a	b1	2518.515869	1963.312622	1	1	1	0	8		8	1		10.50208152	0.75014868
FI4	foraging	infrared	foraginginfrared	60					c5	-1	20	11	a2	b2	2892.926514	1952.382202	1	1	0	0						0	0
FI4	foraging	infrared	foraginginfrared	70					c5	-1	20	11	a1	b2	2888.001465	1949.287476	1	1	0	0						5.816651671	0.415475119
FI4	foraging	infrared	foraginginfrared	80					c4	-1	20	11	a1	b2	2867.323486	1916.925903	1	1	0	0						38.40377875	2.743127054
FI4	foraging	infrared	foraginginfrared	90					c5	-1	20	11	a1	b2	2847.394531	1908.971924	1	1	0	0						21.45761006	1.532686433
FI4	foraging	infrared	foraginginfrared	100					c5	-1	20	11	a1	b2	2849.477295	1910.706787	1	1	0	0						2.710655918	0.19361828
FI4	foraging	infrared	foraginginfrared	110					c5	-1	20	11	a2	b2	2850.003906	1914.738281	1	1	0	0						4.065742616	0.290410187
FI4	foraging	infrared	foraginginfrared	120					c5	-1	20	11	a1	b2	2847.507568	1914.343872	1	1	0	0						2.52730328	0.180521663
FI4	foraging	infrared	foraginginfrared	130					c5	-1	20	11	a2	b2	2974.171631	1952.508423	1	1	0	0						132.2887668	9.449197625
FI4	foraging	infrared	foraginginfrared	140					c5	-1	20	11	a1	b2	2828.375977	1934.947998	1	1	0	0						146.8493829	10.48924163
FI4	foraging	infrared	foraginginfrared	150					c5	-1	20	11	a2	b2	2825.083496	1918.412964	1	1	0	0						16.85964948	1.204260677
FI4	foraging	infrared	foraginginfrared	160					c5	-1	20	11	a1	b2	2821.442383	1915.047119	1	1	0	0						4.958489331	0.354177809
FI4	foraging	infrared	foraginginfrared	170					c5	-1	20	11	a1	b2	2789.456787	1907.268799	1	1	0	0						32.91778567	2.351270405
FI4	foraging	infrared	foraginginfrared	180					c5	-1	20	11	a1	b2	2798.625	1912.558472	1	1	0	0						10.58474232	0.756053023
FI4	foraging	infrared	foraginginfrared	190					c5	-1	20	11	a1	b2	2807.039307	1907.300293	1	1	0	0						9.922147383	0.708724813
FI4	foraging	infrared	foraginginfrared	200						-1	20	11	a2	b2	2807.823975	1904.366821	1	1	0	0						3.036603669	0.216900262
FI4	foraging	infrared	foraginginfrared	210						-1	20	11	a2	b2	2811.211182	1919.497925	1	1	0	0						15.5055951	1.107542507
FI4	foraging	infrared	foraginginfrared	220						-1	11	11	a1	b2	2821.915283	1931.277466	1	1	1	0	11		11	1		15.91651232	1.136893737
FI4	foraging	infrared	foraginginfrared	230						-1	20	11	a2	b2	2826.132813	1933.987915	1	1	0	0						5.013391375	0.358099384
FI4	foraging	infrared	foraginginfrared	240						-1	20	11	a2	b2	2827.09668	1935.989136	1	1	0	0						2.22124404	0.158660289
FI4	foraging	infrared	foraginginfrared	60						-1	20	13	a2	b1	1260.071533	888.604187	1	1	0	0						0	0
FI4	foraging	infrared	foraginginfrared	70						-1	13	13	a	b	1325.760864	857.7949829	1	1	1	0	13		13	1		72.55546337	5.182533098
FI4	foraging	infrared	foraginginfrared	80					c4	-1	20	13	a	b2	1311.434082	860.2649536	1	1	0	0						14.53813735	1.038438382
FI4	foraging	infrared	foraginginfrared	90					c5	-1	20	13	a	b2	1323.956543	857.3117065	1	1	0	0						12.86598997	0.918999284
FI4	foraging	infrared	foraginginfrared	100					c4	-1	20	13	a	b2	1337.837036	862.3683472	1	1	0	0						14.77287044	1.055205032
FI4	foraging	infrared	foraginginfrared	110						-1	13	13	a1	b1	1359.214722	835.9727173	1	1	1	0	13		13	1		33.96667097	2.426190783
FI4	foraging	infrared	foraginginfrared	120					c5	-1	20	13	a1	b2	1379.688477	795.5800171	1	1	0	0						45.28515069	3.234653621
FI4	foraging	infrared	foraginginfrared	130						-1	20	13	a2	b2	1456.04541	668.6430664	1	1	0	0						148.1329493	10.58092495
FI4	foraging	infrared	foraginginfrared	140						-1	13	13	a	b	1480.237793	616.8745117	1	1	1	0	13		13	1		57.14240677	4.081600483
FI4	foraging	infrared	foraginginfrared	150						-1	13	13	a	b	1506.707153	611.951416	1	1	1	0	13		13	1		26.92329642	1.923092601
FI4	foraging	infrared	foraginginfrared	160						13	13	13	a	b1	1560.309204	613.6716919	1	1	1	1	13	13	13	1	1	53.62964871	3.830689193
FI4	foraging	infrared	foraginginfrared	170						13	13	13	a1	b1	1580.251221	630.9088135	1	1	1	1	13	13	13	1	1	26.35910475	1.882793196
FI4	foraging	infrared	foraginginfrared	180					c5	13	20	13	a2	b2	1633.135986	726.4866333	1	1	0	1		13	13	0	1	109.2333191	7.802379937
FI4	foraging	infrared	foraginginfrared	190					c5	13	20	13	a2	b2	1778.10083	789.21521	1	1	0	1		13	13	0	1	157.9546781	11.28247701
FI4	foraging	infrared	foraginginfrared	200						13	13	13	a	b1	1850.962158	799.7759399	1	1	1	1	13	13	13	1	1	73.62270121	5.258764372
FI4	foraging	infrared	foraginginfrared	210							20	13	a2	b2	1945	876	1	0	0	0						121.050498	8.646464143
FI4	foraging	infrared	foraginginfrared	220					c5		20	13	a2	b2	2102	994	1	0	0	0						196.4001018	14.0285787
FI4	foraging	infrared	foraginginfrared	230							13	13	a	b1	2147	1048	1	0	1	0	13		13	1		70.29224708	5.020874792
FI4	foraging	infrared	foraginginfrared	240						-1	20	13	a2	b1	2135.694092	1103.664063	1	1	0	0						56.80062909	4.057187792
FI4	foraging	infrared	foraginginfrared	60		1				-1	20	14	a2	b	974.1879883	461.8323364	1	1	0	0						0	0
FI4	foraging	infrared	foraginginfrared	70		1				-1	20	14	a2	b1	973.03479	460.8418274	1	1	0	0						1.520188935	0.108584924
FI4	foraging	infrared	foraginginfrared	80		1				-1	20	14	a2	b1	972.9835815	460.7571411	1	1	0	0						0.098965044	0.007068932
FI4	foraging	infrared	foraginginfrared	90		1				-1	20	14	a2	b1	972.6925659	461.1612549	1	1	0	0						0.497994019	0.035571001
FI4	foraging	infrared	foraginginfrared	100		1				-1	20	14	a2	b	972.9451904	460.7263489	1	1	0	0						0.502953643	0.03592526
FI4	foraging	infrared	foraginginfrared	110		1				-1	14	14	a1	b	972.9780273	460.5021973	1	1	1	0	14		14	1		0.226544039	0.016181717
FI4	foraging	infrared	foraginginfrared	120		1				-1	14	14	a1	b	972.4130249	460.7371216	1	1	1	0	14		14	1		0.611896346	0.043706882
FI4	foraging	infrared	foraginginfrared	130		1				-1	14	14	a1	b1	972.3047485	460.2644043	1	1	1	0	14		14	1		0.484959199	0.034639943
FI4	foraging	infrared	foraginginfrared	140		1				-1	14	14	a2	b1	972.1994629	459.8609924	1	1	1	0	14		14	1		0.416924716	0.029780337
FI4	foraging	infrared	foraginginfrared	150		1				-1	14	14	a1	b	972.2094727	460.0660706	1	1	1	0	14		14	1		0.205322342	0.014665882
FI4	foraging	infrared	foraginginfrared	160		1				-1	14	14	a1	b	971.9289551	460.3060303	1	1	1	0	14		14	1		0.369148725	0.026367766
FI4	foraging	infrared	foraginginfrared	170		1				-1	14	14	a1	b	971.8987427	460.2316895	1	1	1	0	14		14	1		0.080245521	0.005731823
FI4	foraging	infrared	foraginginfrared	180		1				-1	14	14	a1	b	972.5031128	460.1439209	1	1	1	0	14		14	1		0.61070987	0.043622134
FI4	foraging	infrared	foraginginfrared	190		1					14	14	a2	b1	890	443	1	0	1	0	14		19	0		84.26551872	6.018965623
FI4	foraging	infrared	foraginginfrared	200		1				-1	14	14	a1	b1	972.8516846	460.2934265	1	1	1	0	14		14	1		84.63725091	6.045517922
FI4	foraging	infrared	foraginginfrared	210		1				-1	14	14	a1	b	972.9691772	460.131073	1	1	1	0	14		14	1		0.20040751	0.014314822
FI4	foraging	infrared	foraginginfrared	220		1				-1	14	14	a1	b1	971.7479248	460.3161011	1	1	1	0	14		14	1		1.235189387	0.088227813
FI4	foraging	infrared	foraginginfrared	230		1				-1	14	14	a1	b	972.1126709	460.4692688	1	1	1	0	14		14	1		0.395600887	0.028257206
FI4	foraging	infrared	foraginginfrared	240		1				-1	14	14	a1	b	970.8792725	459.9042664	1	1	1	0	14		14	1		1.356650038	0.096903574
FI4	foraging	infrared	foraginginfrared	60					c5	-1	20	15	a2	b	3186.556396	1934.29834	1	1	0	0						0	0
FI4	foraging	infrared	foraginginfrared	70						-1	15	15	a1	b1	3189.008545	1935.666016	1	1	1	0	15		15	1		2.807769998	0.200555
FI4	foraging	infrared	foraginginfrared	80						-1	15	15	a1	b1	3188.94873	1934.752075	1	1	1	0	15		15	1		0.915896275	0.065421162
FI4	foraging	infrared	foraginginfrared	90						-1	15	15	a1	b1	3189.279297	1935.792603	1	1	1	0	15		15	1		1.091775188	0.077983942
FI4	foraging	infrared	foraginginfrared	100				1			15	15	a1	b	3202	1935	1	0	1	0	15		15	1		12.74537188	0.910383706
FI4	foraging	infrared	foraginginfrared	110				1			15	15	a1	b	3202	1941	1	0	1	0	15		15	1		6	0.428571429
FI4	foraging	infrared	foraginginfrared	120						-1	15	15	a1	b1	3190.04248	1936.064819	1	1	1	0	15		15	1		12.93593043	0.923995031
FI4	foraging	infrared	foraginginfrared	130						-1	15	15	a2	b1	3188.522705	1934.755127	1	1	1	0	15		15	1		2.006242554	0.14330304
FI4	foraging	infrared	foraginginfrared	140						-1	15	15	a1	b1	3188.682373	1935.218018	1	1	1	0	15		15	1		0.489654928	0.034975352
FI4	foraging	infrared	foraginginfrared	150						-1	15	15	a1	b	3189.580322	1934.435425	1	1	1	0	15		15	1		1.19111889	0.085079921
FI4	foraging	infrared	foraginginfrared	160						-1	20	15	a1	b	3190.519287	1934.511475	1	1	0	0						0.942039741	0.067288553
FI4	foraging	infrared	foraginginfrared	170						-1	15	15	a1	b	3189.486328	1934.670288	1	1	1	0	15		15	1		1.045096103	0.074649722
FI4	foraging	infrared	foraginginfrared	180						-1	20	15	a1	b1	3189.467285	1935.130249	1	1	0	0						0.460355034	0.032882502
FI4	foraging	infrared	foraginginfrared	190						-1	15	15	a1	b1	3189.883545	1934.870972	1	1	1	0	15		15	1		0.490404884	0.03502892
FI4	foraging	infrared	foraginginfrared	200						-1	20	15	a1	b1	3190.775879	1935.676147	1	1	0	0						1.201901306	0.085850093
FI4	foraging	infrared	foraginginfrared	210						-1	20	15	a1	b1	3190.056641	1934.868286	1	1	0	0						1.081638894	0.077259921
FI4	foraging	infrared	foraginginfrared	220						-1	15	15	a	b1	3190.367432	1934.243652	1	1	1	0	15		15	1		0.69768093	0.049834352
FI4	foraging	infrared	foraginginfrared	230				1		-1	15	15	a2	b1	3189.467041	1935.157715	1	1	1	0	15		15	1		1.28304915	0.091646368
FI4	foraging	infrared	foraginginfrared	240						-1	15	15	a1	b1	3190.592773	1935.581665	1	1	1	0	15		15	1		1.202915682	0.085922549
FI4	foraging	infrared	foraginginfrared	60					c5	-1	20	17	a2	b2	3106.931396	1681.622192	1	1	0	0						0	0
FI4	foraging	infrared	foraginginfrared	70						-1	17	17	a1	b1	3098.987549	1701.031738	1	1	1	0	17		17	1		20.97224788	1.498017706
FI4	foraging	infrared	foraginginfrared	80						17	17	17	a1	b1	3100.548828	1714.453613	1	1	1	1	17	17	17	1	1	13.51237657	0.965169755
FI4	foraging	infrared	foraginginfrared	90						17	17	17	a1	b1	3094.796875	1739.178833	1	1	1	1	17	17	17	1	1	25.38545779	1.813246985
FI4	foraging	infrared	foraginginfrared	100							17	17	a1	b1	3097	1732	1	0	1	0	17		17	1		7.509287783	0.536377699
FI4	foraging	infrared	foraginginfrared	110						-1	17	17	a1	b2	3096.487549	1731.087891	1	1	1	0	17		17	1		1.046206889	0.074729064
FI4	foraging	infrared	foraginginfrared	120						17	17	17	a1	b2	3097.259277	1729.109253	1	1	1	1	17	17	17	1	1	2.12381083	0.151700774
FI4	foraging	infrared	foraginginfrared	130						17	17	17	a1	b1	3095.813965	1730.266724	1	1	1	1	17	17	17	1	1	1.851665708	0.132261836
FI4	foraging	infrared	foraginginfrared	140						17	17	17	a1	b1	3095.712891	1731.238281	1	1	1	1	17	17	17	1	1	0.976800367	0.069771455
FI4	foraging	infrared	foraginginfrared	150						17	17	17	a1	b1	3096.535645	1731.411499	1	1	1	1	17	17	17	1	1	0.840790473	0.060056462
FI4	foraging	infrared	foraginginfrared	160						17	17	17	a1	b2	3096.281738	1731.338257	1	1	1	1	17	17	17	1	1	0.264259636	0.018875688
FI4	foraging	infrared	foraginginfrared	170						17	17	17	a1	b1	3094.731934	1731.359131	1	1	1	1	17	17	17	1	1	1.549944567	0.110710326
FI4	foraging	infrared	foraginginfrared	180						17	17	17	a1	b1	3093.167969	1732.52356	1	1	1	1	17	17	17	1	1	1.949841383	0.139274384
FI4	foraging	infrared	foraginginfrared	190						17	17	17	a1	b2	3095.083252	1733.5625	1	1	1	1	17	17	17	1	1	2.178922966	0.155637355
FI4	foraging	infrared	foraginginfrared	200						17	17	17	a1	b2	3094.787109	1732.353149	1	1	1	1	17	17	17	1	1	1.245082534	0.088934467
FI4	foraging	infrared	foraginginfrared	210						17	17	17	a1	b2	3093.94873	1734.308716	1	1	1	1	17	17	17	1	1	2.127703372	0.151978812
FI4	foraging	infrared	foraginginfrared	220						17	17	17	a1	b2	3095.590576	1732.59668	1	1	1	1	17	17	17	1	1	2.372071996	0.169433714
FI4	foraging	infrared	foraginginfrared	230						17	17	17	a1	b2	3095.281006	1734.347778	1	1	1	1	17	17	19	0	0	1.778251329	0.127017952
FI4	foraging	infrared	foraginginfrared	240						17	17	17	a1	b2	3095.204834	1733.665894	1	1	1	1	17	17	17	1	1	0.686125326	0.049008952
FI4	foraging	infrared	foraginginfrared	60		1					20	19	a2	b1	903	447	1	0	0	0						0	0
FI4	foraging	infrared	foraginginfrared	70		1					20	19	a2	b1	882	447	1	0	0	0						21	1.5
FI4	foraging	infrared	foraginginfrared	80		1					20	19	a2	b1	887	441	1	0	0	0						7.810249676	0.557874977
FI4	foraging	infrared	foraginginfrared	90		1					20	19	a2	b1	898	441	1	0	0	0						11	0.785714286
FI4	foraging	infrared	foraginginfrared	100		1					20	19	a2	b1	894	441	1	0	0	0						4	0.285714286
FI4	foraging	infrared	foraginginfrared	110		1					20	19	a2	b1	898	444	1	0	0	0						5	0.357142857
FI4	foraging	infrared	foraginginfrared	120		1					20	19	a2	b1	894	444	1	0	0	0						4	0.285714286
FI4	foraging	infrared	foraginginfrared	130		1					20	19	a2	b1	894	444	1	0	0	0						0	0
FI4	foraging	infrared	foraginginfrared	140		1					20	19	a2	b1	892	441	1	0	0	0						3.605551275	0.257539377
FI4	foraging	infrared	foraginginfrared	150		1					20	19	a2	b1	888	444	1	0	0	0						5	0.357142857
FI4	foraging	infrared	foraginginfrared	160		1					20	19	a2	b1	894	444	1	0	0	0						6	0.428571429
FI4	foraging	infrared	foraginginfrared	170		1					20	19	a2	b1	894	443	1	0	0	0						1	0.071428571
FI4	foraging	infrared	foraginginfrared	180		1					19	19	a1	b1	896	444	1	0	1	0	19		19	1		2.236067977	0.159719141
FI4	foraging	infrared	foraginginfrared	190		1				-1	19	19	a1	b	972.3074341	459.92099	1	1	1	0	19		14	0		77.95064093	5.567902924
FI4	foraging	infrared	foraginginfrared	200		1					19	19	a1	b1	900	439	1	0	1	0	19		19	1		75.27318811	5.376656294
FI4	foraging	infrared	foraginginfrared	210		1					19	19	a1	b2	900	443	1	0	1	0	19		19	1		4	0.285714286
FI4	foraging	infrared	foraginginfrared	220		1					19	19	a2	b2	890	444	1	0	1	0	19		19	1		10.04987562	0.717848259
FI4	foraging	infrared	foraginginfrared	230							19	19	a2	b2	894	441	1	0	1	0	19		19	1		5	0.357142857
FI4	foraging	infrared	foraginginfrared	240		1					19	19	a2	b1	894	443	1	0	1	0	19		19	1		2	0.142857143
FI4	foraging	infrared	foraginginfrared	60					c4	-1	20	21	a	b2	1131.621704	1238.569702	1	1	0	0						0	0
FI4	foraging	infrared	foraginginfrared	70					c	-1	20	21	a	b2	1128.442261	1229.426025	1	1	0	0						9.680686281	0.691477591
FI4	foraging	infrared	foraginginfrared	80					c	-1	20	21	a	b2	1126.198242	1229.83374	1	1	0	0						2.280757066	0.162911219
FI4	foraging	infrared	foraginginfrared	90					c	-1	20	21	a	b2	1127.510376	1229.914673	1	1	0	0						1.314627622	0.093901973
FI4	foraging	infrared	foraginginfrared	100					c	-1	20	21	a	b2	1128.622314	1230.293701	1	1	0	0						1.1747631	0.08391165
FI4	foraging	infrared	foraginginfrared	110					c	-1	20	21	a	b2	1128.438843	1231.511597	1	1	0	0						1.231638045	0.087974146
FI4	foraging	infrared	foraginginfrared	120					c	-1	20	21	a	b2	1127.221069	1229.848999	1	1	0	0						2.060874966	0.147205355
FI4	foraging	infrared	foraginginfrared	130					c	-1	20	21	a	b2	1127.870605	1230.299438	1	1	0	0						0.790438048	0.056459861
FI4	foraging	infrared	foraginginfrared	140					c	-1	20	21	a	b2	1128.087402	1230.22168	1	1	0	0						0.230319877	0.01645142
FI4	foraging	infrared	foraginginfrared	150					c	-1	20	21	a	b2	1123.32312	1231.625488	1	1	0	0						4.966795735	0.354771124
FI4	foraging	infrared	foraginginfrared	160					c	-1	20	21	a	b2	1123.915283	1233.051758	1	1	0	0						1.544313158	0.110308083
FI4	foraging	infrared	foraginginfrared	170					c	-1	20	21	a	b2	1124.158813	1234.430908	1	1	0	0						1.400486195	0.100034728
FI4	foraging	infrared	foraginginfrared	180					c	-1	20	21	a	b2	1125.252686	1235.862671	1	1	0	0						1.801805602	0.1287004
FI4	foraging	infrared	foraginginfrared	190					c	-1	20	21	a	b2	1125.675293	1236.486206	1	1	0	0						0.753254653	0.053803904
FI4	foraging	infrared	foraginginfrared	200					c	-1	20	21	a	b2	1129.824707	1238.152832	1	1	0	0						4.471608074	0.319400577
FI4	foraging	infrared	foraginginfrared	210					c	-1	20	21	a	b2	1136.366943	1240.424561	1	1	0	0						6.925431721	0.494673694
FI4	foraging	infrared	foraginginfrared	220					c	-1	20	21	a	b2	1138.102905	1241.079956	1	1	0	0						1.855561013	0.132540072
FI4	foraging	infrared	foraginginfrared	230					c	-1	20	21	a	b2	1137.537109	1239.790039	1	1	0	0						1.408549247	0.10061066
FI4	foraging	infrared	foraginginfrared	240					c	-1	20	21	a	b2	1136.590454	1241.033936	1	1	0	0						1.563149205	0.111653515
FI4	foraging	infrared	foraginginfrared	60					c4	-1	20	22	a	b2	1173.420898	688.2894897	1	1	0	0						0	0
FI4	foraging	infrared	foraginginfrared	70					c4	-1	20	22	a	b2	1172.1427	687.6305542	1	1	0	0						1.438049415	0.102717815
FI4	foraging	infrared	foraginginfrared	80					c4	-1	20	22	a	b2	1171.30603	688.3532715	1	1	0	0						1.105593499	0.078970964
FI4	foraging	infrared	foraginginfrared	90					c4	-1	20	22	a	b2	1171.581543	686.7391968	1	1	0	0						1.63742009	0.116958578
FI4	foraging	infrared	foraginginfrared	100					c4	-1	20	22	a	b2	1172.806519	686.4474487	1	1	0	0						1.259239117	0.089945651
FI4	foraging	infrared	foraginginfrared	110					c4	-1	20	22	a	b2	1173.035522	686.8583984	1	1	0	0						0.470448754	0.033603482
FI4	foraging	infrared	foraginginfrared	120					c4	-1	20	22	a	b2	1170.829712	686.0637817	1	1	0	0						2.34457106	0.167469361
FI4	foraging	infrared	foraginginfrared	130					c4	-1	20	22	a	b2	1170.427612	687.2866821	1	1	0	0						1.287311073	0.091950791
FI4	foraging	infrared	foraginginfrared	140					c4	-1	20	22	a	b2	1171.338501	687.0615234	1	1	0	0						0.938304434	0.067021745
FI4	foraging	infrared	foraginginfrared	150					c4	-1	20	22	a	b2	1171.596313	686.6841431	1	1	0	0						0.457037108	0.032645508
FI4	foraging	infrared	foraginginfrared	160					c4	-1	20	22	a	b2	1172.113281	688.1567993	1	1	0	0						1.560760134	0.111482867
FI4	foraging	infrared	foraginginfrared	170					c4	-1	20	22	a	b2	1172.728394	687.6616821	1	1	0	0						0.789623356	0.056401668
FI4	foraging	infrared	foraginginfrared	180					c4	-1	20	22	a	b2	1170.865112	687.2924805	1	1	0	0						1.899507734	0.135679124
FI4	foraging	infrared	foraginginfrared	190					c4	-1	20	22	a	b2	1173.233154	687.4285889	1	1	0	0						2.371950339	0.169425024
FI4	foraging	infrared	foraginginfrared	200					c4	-1	20	22	a	b2	1173.277466	687.6948853	1	1	0	0						0.269958008	0.019282715
FI4	foraging	infrared	foraginginfrared	210					c4	-1	20	22	a	b2	1173.237793	688.2294312	1	1	0	0						0.536016106	0.038286865
FI4	foraging	infrared	foraginginfrared	220					c4	-1	20	22	a	b2	1172.672729	688.1942139	1	1	0	0						0.566160386	0.040440028
FI4	foraging	infrared	foraginginfrared	230					c4	-1	20	22	a	b2	1172.317871	687.8474731	1	1	0	0						0.496138471	0.035438462
FI4	foraging	infrared	foraginginfrared	240					c4	-1	20	22	a	b2	1172.188843	687.9612427	1	1	0	0						0.172022518	0.012287323
FI4	foraging	infrared	foraginginfrared	60					c4	-1	20	23	a	b2	1466.647583	1122.940674	1	1	0	0						0	0
FI4	foraging	infrared	foraginginfrared	70					c4	-1	20	23	a	b2	1465.7677	1121.96814	1	1	0	0						1.311493986	0.093678142
FI4	foraging	infrared	foraginginfrared	80					c4	-1	20	23	a	b2	1465.812012	1122.431885	1	1	0	0						0.465857251	0.033275518
FI4	foraging	infrared	foraginginfrared	90					c4	-1	20	23	a	b2	1466.02832	1121.725708	1	1	0	0						0.738562865	0.05275449
FI4	foraging	infrared	foraginginfrared	100					c4	-1	20	23	a	b2	1466.17981	1121.337524	1	1	0	0						0.416696578	0.029764041
FI4	foraging	infrared	foraginginfrared	110					c4	-1	20	23	a	b2	1466.176392	1121.157715	1	1	0	0						0.179841484	0.01284582
FI4	foraging	infrared	foraginginfrared	120					c4	-1	20	23	a	b2	1466.301636	1121.213623	1	1	0	0						0.137155984	0.009796856
FI4	foraging	infrared	foraginginfrared	130					c4	-1	20	23	a	b2	1465.959717	1121.145874	1	1	0	0						0.348566392	0.024897599
FI4	foraging	infrared	foraginginfrared	140					c4	-1	20	23	a	b2	1466.220825	1121.649902	1	1	0	0						0.567645675	0.04054612
FI4	foraging	infrared	foraginginfrared	150					c4	-1	20	23	a	b2	1466.011841	1121.685791	1	1	0	0						0.212043233	0.015145945
FI4	foraging	infrared	foraginginfrared	160					c4	-1	20	23	a	b2	1466.206177	1122.268433	1	1	0	0						0.614197184	0.043871227
FI4	foraging	infrared	foraginginfrared	170					c4	-1	20	23	a	b2	1466.614868	1120.89563	1	1	0	0						1.43234647	0.102310462
FI4	foraging	infrared	foraginginfrared	180					c4	-1	20	23	a	b2	1465.835571	1122.195557	1	1	0	0						1.515623311	0.108258808
FI4	foraging	infrared	foraginginfrared	190					c4	-1	20	23	a	b2	1466.246704	1121.890991	1	1	0	0						0.511654954	0.036546782
FI4	foraging	infrared	foraginginfrared	200					c4	-1	20	23	a	b2	1465.838135	1121.392822	1	1	0	0						0.644283307	0.046020236
FI4	foraging	infrared	foraginginfrared	210					c4	-1	20	23	a	b2	1466.273315	1121.597656	1	1	0	0						0.480976715	0.03435548
FI4	foraging	infrared	foraginginfrared	220					c4	-1	20	23	a	b2	1466.258179	1121.183716	1	1	0	0						0.414216637	0.029586903
FI4	foraging	infrared	foraginginfrared	230					c4	-1	20	23	a1	b2	1466.121216	1121.183838	1	1	0	0						0.136963054	0.009783075
FI4	foraging	infrared	foraginginfrared	240					c4	-1	20	23	a	b2	1465.7854	1121.308472	1	1	0	0						0.358198297	0.025585593
FI4	foraging	infrared	foraginginfrared	60				1	c1		20	26	a2	b2	2073	375	1	0	0	0						0	0
FI4	foraging	infrared	foraginginfrared	70				1	c1		20	26	a2	b2	2064	363	1	0	0	0						15	1.071428571
FI4	foraging	infrared	foraginginfrared	80				1	c1		20	26	a2	b2	2070	370	1	0	0	0						9.219544457	0.65853889
FI4	foraging	infrared	foraginginfrared	90				1	c1		20	26	a2	b2	2074	377	1	0	0	0						8.062257748	0.575875553
FI4	foraging	infrared	foraginginfrared	100				1	c1		20	26	a2	b2	2072	370	1	0	0	0						7.280109889	0.520007849
FI4	foraging	infrared	foraginginfrared	110				1	c1		20	26	a2	b2	2067	373	1	0	0	0						5.830951895	0.416496564
FI4	foraging	infrared	foraginginfrared	120				1	c1		20	26	a2	b2	2068	368	1	0	0	0						5.099019514	0.36421568
FI4	foraging	infrared	foraginginfrared	130				1	c1		20	26	a2	b2	2074	366	1	0	0	0						6.32455532	0.451753951
FI4	foraging	infrared	foraginginfrared	140				1	c1		20	26	a2	b2	2074	365	1	0	0	0						1	0.071428571
FI4	foraging	infrared	foraginginfrared	150				1	c1		20	26	a2	b2	2074	370	1	0	0	0						5	0.357142857
FI4	foraging	infrared	foraginginfrared	160				1	c1		20	26	a2	b2	2068	364	1	0	0	0						8.485281374	0.606091527
FI4	foraging	infrared	foraginginfrared	170				1	c1		20	26	a2	b2	2070	362	1	0	0	0						2.828427125	0.202030509
FI4	foraging	infrared	foraginginfrared	180				1	c1		20	26	a2	b2	2070	364	1	0	0	0						2	0.142857143
FI4	foraging	infrared	foraginginfrared	190				1	c1		20	26	a2	b2	2072	366	1	0	0	0						2.828427125	0.202030509
FI4	foraging	infrared	foraginginfrared	200				1	c1		20	26	a2	b2	2070	364	1	0	0	0						2.828427125	0.202030509
FI4	foraging	infrared	foraginginfrared	210				1	c1		20	26	a2	b2	2067	360	1	0	0	0						5	0.357142857
FI4	foraging	infrared	foraginginfrared	220				1	c1		20	26	a2	b2	2063	360	1	0	0	0						4	0.285714286
FI4	foraging	infrared	foraginginfrared	230		1			c1		20	26	a2	b2	2068	364	1	0	0	0						6.403124237	0.457366017
FI4	foraging	infrared	foraginginfrared	240				1	c1		20	26	a2	b2	2070	360	1	0	0	0						4.472135955	0.319438282
FV1	foraging	visible	foragingvisible	60						-1	20	0	a2	b	2743.161621	361.0298767	1	1	0	0						0	0
FV1	foraging	visible	foragingvisible	70		1				-1	0	0	a1	b	2801.213623	330.2367554	1	1	1	0	0		0	1		65.7134024	4.693814457
FV1	foraging	visible	foragingvisible	80						1	20	0	a2	b1	2951.921387	350.6665649	1	1	0	1		1	0	1	0	152.0861836	10.86329883
FV1	foraging	visible	foragingvisible	90						1	20	0	a2	b	2985.342773	393.3380432	1	1	0	1		1	0	1	0	54.20188283	3.871563059
FV1	foraging	visible	foragingvisible	100						1	20	0	a2	b	3029.277832	614.9530029	1	1	0	1		1	0	1	0	225.9280411	16.13771722
FV1	foraging	visible	foragingvisible	110						1	20	0	a2	b	3065.322754	956.6469727	1	1	0	1		1	0	1	0	343.5898797	24.54213426
FV1	foraging	visible	foragingvisible	120					c5	-1	20	0	a2	b	3126.047363	1397.996216	1	1	0	0						445.5071635	31.82194025
FV1	foraging	visible	foragingvisible	130					c5	-1	20	0	a2	b	3095.945557	1845.604858	1	1	0	0						448.6196776	32.04426268
FV1	foraging	visible	foragingvisible	140					c5	-1	20	0	a2	b	2630.800781	1905.729736	1	1	0	0						469.0145665	33.50104046
FV1	foraging	visible	foragingvisible	150					c5	-1	20	0	a2	b1	2104.294434	1940.21106	1	1	0	0						527.6342437	37.68816027
FV1	foraging	visible	foragingvisible	160						-1	0	0	a1	b	1965.066895	1964.616943	1	1	1	0	0		0	1		141.3504678	10.09646198
FV1	foraging	visible	foragingvisible	170						-1	0	0	a1	b	1707.25	1951.568481	1	1	1	0	0		0	1		258.146884	18.43906314
FV1	foraging	visible	foragingvisible	180						-1	20	0	a2	b1	1611.054199	1968.413086	1	1	0	0						97.65947393	6.975676709
FV1	foraging	visible	foragingvisible	190					c5	-1	20	0	a2	b	1201.385254	1943.651245	1	1	0	0						410.4166094	29.3154721
FV1	foraging	visible	foragingvisible	200					c5	-1	20	0	a2	b	964.7401733	1529.398682	1	1	0	0						477.08079	34.07719928
FV1	foraging	visible	foragingvisible	210						-1	0	0	a	b	1062.596069	1109.802368	1	1	1	0	0		0	1		430.8559423	30.77542445
FV1	foraging	visible	foragingvisible	220						-1	0	0	a	b	997.0496826	992.9953613	1	1	1	0	0		0	1		133.9410526	9.567218046
FV1	foraging	visible	foragingvisible	230					c5	-1	20	0	a2	b	905.5447388	824.3184204	1	1	0	0						191.8985803	13.70704145
FV1	foraging	visible	foragingvisible	240						-1	20	0	a2	b1	885.5588379	615.5514526	1	1	0	0						209.7214416	14.98010297
FV1	foraging	visible	foragingvisible	60						1	20	1	a1	b	2855.550049	398.1650391	1	1	0	1		1	1	0	1	0	0
FV1	foraging	visible	foragingvisible	70						1	1	1	a	b1	2847.087158	411.7431641	1	1	1	1	1	1	1	1	1	15.99956258	1.142825898
FV1	foraging	visible	foragingvisible	80						1	1	1	a	b	2838.463135	408.9113464	1	1	1	1	1	1	1	1	1	9.077057023	0.648361216
FV1	foraging	visible	foragingvisible	90						1	20	1	a2	b	2793.518799	391.3304138	1	1	0	1		1	1	0	1	48.2605691	3.447183507
FV1	foraging	visible	foragingvisible	100						1	1	1	a	b	2719.179932	360.4076843	1	1	1	1	1	1	1	1	1	80.51386431	5.750990308
FV1	foraging	visible	foragingvisible	110						-1	20	1	a1	b1	2745.333496	350.1624756	1	1	0	0						28.08866695	2.006333354
FV1	foraging	visible	foragingvisible	120						-1	1	1	a	b1	2787.982666	347.2407227	1	1	1	0	1		1	1		42.74913264	3.053509474
FV1	foraging	visible	foragingvisible	130						-1	1	1	a	b	2765.849365	355.8447876	1	1	1	0	1		1	1		23.74685129	1.696203663
FV1	foraging	visible	foragingvisible	140						-1	1	1	a	b	2778.198975	355.3378601	1	1	1	0	1		1	1		12.36000982	0.882857844
FV1	foraging	visible	foragingvisible	150						-1	1	1	a	b	2780.774902	363.8334961	1	1	1	0	1		1	1		8.877568978	0.63411207
FV1	foraging	visible	foragingvisible	160						-1	1	1	a	b	2778.124023	360.0242615	1	1	1	0	1		1	1		4.640843427	0.331488816
FV1	foraging	visible	foragingvisible	170						-1	1	1	a	b	2774.74585	359.6118164	1	1	1	0	1		1	1		3.403257818	0.243089844
FV1	foraging	visible	foragingvisible	180						-1	1	1	a	b	2773.729248	360.4754333	1	1	1	0	1		1	1		1.333909208	0.095279229
FV1	foraging	visible	foragingvisible	190						-1	1	1	a	b	2769.094727	356.0227356	1	1	1	0	1		1	1		6.426920079	0.45906572
FV1	foraging	visible	foragingvisible	200						-1	1	1	a	b1	2769.507568	357.3575745	1	1	1	0	1		1	1		1.397223168	0.099801655
FV1	foraging	visible	foragingvisible	210						-1	1	1	a	b	2773.845947	356.4927368	1	1	1	0	1		1	1		4.423740114	0.315981437
FV1	foraging	visible	foragingvisible	220						-1	1	1	a	b1	2777.327393	364.8935547	1	1	1	0	1		1	1		9.093635557	0.649545397
FV1	foraging	visible	foragingvisible	230						-1	1	1	a1	b	2809.222168	367.9096985	1	1	1	0	1		1	1		32.03706909	2.288362078
FV1	foraging	visible	foragingvisible	240						-1	1	1	a	b	2849.294678	380.0541687	1	1	1	0	1		1	1		41.8723562	2.990882586
FV1	foraging	visible	foragingvisible	60						2	2	2	a1	b	2258.81665	547.6402588	1	1	1	1	2	2	2	1	1	0	0
FV1	foraging	visible	foragingvisible	70						2	2	2	a	b	2257.297607	535.6161499	1	1	1	1	2	2	2	1	1	12.11968178	0.865691556
FV1	foraging	visible	foragingvisible	80						2	2	2	a	b	2257.252197	544.7958984	1	1	1	1	2	2	2	1	1	9.179860815	0.655704344
FV1	foraging	visible	foragingvisible	90						2	2	2	a	b	2256.174316	535.7126465	1	1	1	1	2	2	2	1	1	9.146982701	0.653355907
FV1	foraging	visible	foragingvisible	100						2	2	2	a	b	2252.635498	535.6295776	1	1	1	1	2	2	2	1	1	3.53979283	0.252842345
FV1	foraging	visible	foragingvisible	110						2	2	2	a	b	2249.639404	544.8036499	1	1	1	1	2	2	2	1	1	9.650916113	0.689351151
FV1	foraging	visible	foragingvisible	120						2	2	2	a	b	2251.819092	546.4519043	1	1	1	1	2	2	2	1	1	2.732724345	0.195194596
FV1	foraging	visible	foragingvisible	130						2	2	2	a	b	2246.931396	535.2404785	1	1	1	1	2	2	2	1	1	12.23052087	0.873608633
FV1	foraging	visible	foragingvisible	140						2	2	2	a	b	2249.827393	535.3748169	1	1	1	1	2	2	2	1	1	2.899111145	0.207079367
FV1	foraging	visible	foragingvisible	150						2	2	2	a	b	2253.523438	544.6467285	1	1	1	1	2	2	2	1	1	9.98143744	0.712959817
FV1	foraging	visible	foragingvisible	160						2	2	2	a	b	2252.059326	535.4452515	1	1	1	1	2	2	2	1	1	9.317231506	0.665516536
FV1	foraging	visible	foragingvisible	170						2	2	2	a	b	2252.677979	544.7050171	1	1	1	1	2	2	2	1	1	9.280408962	0.662886354
FV1	foraging	visible	foragingvisible	180						2	2	2	a	b	2254.013184	545.578125	1	1	1	1	2	2	2	1	1	1.595333757	0.113952411
FV1	foraging	visible	foragingvisible	190						2	2	2	a	b1	2251.579102	535.8456421	1	1	1	1	2	2	2	1	1	10.03224694	0.716589067
FV1	foraging	visible	foragingvisible	200						2	2	2	a	b	2253.830078	532.7979126	1	1	1	1	2	2	2	1	1	3.788871607	0.270633686
FV1	foraging	visible	foragingvisible	210						2	2	2	a	b	2255.317627	535.4205933	1	1	1	1	2	2	2	1	1	3.015170987	0.215369356
FV1	foraging	visible	foragingvisible	220						2	2	2	a	b1	2257.446289	534.2075806	1	1	1	1	2	2	2	1	1	2.450020759	0.175001483
FV1	foraging	visible	foragingvisible	230						2	2	2	a	b1	2257.809082	532.1676636	1	1	1	1	2	2	2	1	1	2.07192667	0.147994762
FV1	foraging	visible	foragingvisible	240						2	2	2	a	b1	2255.627441	532.4458618	1	1	1	1	2	2	2	1	1	2.199307093	0.157093364
FV1	foraging	visible	foragingvisible	60						-1	20	3	a1	b	1392.67041	446.0058899	1	1	0	0						0	0
FV1	foraging	visible	foragingvisible	70						-1	3	3	a2	b	1350.421387	464.7222595	1	1	1	0	3		3	1		46.20911637	3.300651169
FV1	foraging	visible	foragingvisible	80						-1	20	3	a2	b1	1100.43103	423.0837402	1	1	0	0						253.4343009	18.10245007
FV1	foraging	visible	foragingvisible	90						-1	20	3	a2	b	908.25177	492.1450806	1	1	0	0						204.2115	14.58653571
FV1	foraging	visible	foragingvisible	100						-1	3	3	a	b	865.2227783	448.6730042	1	1	1	0	3		3	1		61.16629426	4.369021018
FV1	foraging	visible	foragingvisible	110						-1	20	3	a2	b1	887.007019	627.3016357	1	1	0	0						179.9520523	12.85371802
FV1	foraging	visible	foragingvisible	120						-1	20	3	a2	b2	918.5408936	925.1643677	1	1	0	0						299.5272815	21.39480582
FV1	foraging	visible	foragingvisible	130					c5	-1	20	3	a2	b1	889.7922974	1263.174194	1	1	0	0						339.2301939	24.23072814
FV1	foraging	visible	foragingvisible	140						-1	20	3	a2	b1	888.3190918	1699.598389	1	1	0	0						436.4266815	31.17333439
FV1	foraging	visible	foragingvisible	150						-1	20	3	a2	b2	928.59021	1940.086914	1	1	0	0						243.8370227	17.41693019
FV1	foraging	visible	foragingvisible	160					c5	-1	20	3	a2	b1	1229.433594	1942.794678	1	1	0	0						300.8555695	21.48968353
FV1	foraging	visible	foragingvisible	170						-1	3	3	a	b1	1564.573975	1937.945435	1	1	1	0	3		3	1		335.1754617	23.94110441
FV1	foraging	visible	foragingvisible	180						-1	3	3	a	b1	1605.283081	1904.800293	1	1	1	0	3		3	1		52.49601651	3.749715465
FV1	foraging	visible	foragingvisible	190						-1	3	3	a	b2	1655.535889	1851.104126	1	1	1	0	3		3	1		73.54334139	5.253095813
FV1	foraging	visible	foragingvisible	200						-1	20	3	a1	b2	1658.137573	1847.620361	1	1	0	0						4.348031533	0.310573681
FV1	foraging	visible	foragingvisible	210					c4	-1	20	3	a	b2	1669.831421	1863.836792	1	1	0	0						19.99296665	1.428069046
FV1	foraging	visible	foragingvisible	220						-1	3	3	a1	b2	1658.648193	1844.290161	1	1	1	0	3		3	1		22.51966634	1.608547596
FV1	foraging	visible	foragingvisible	230					c4	-1	20	3	a	b2	1658.480713	1860.389771	1	1	0	0						16.1004811	1.150034364
FV1	foraging	visible	foragingvisible	240						-1	3	3	a1	b2	1668.248779	1862.115723	1	1	1	0	3		3	1		9.919376174	0.70852687
FV1	foraging	visible	foragingvisible	60					c5	-1	20	4	a2	b1	1910.785034	362.1755371	1	1	0	0						0	0
FV1	foraging	visible	foragingvisible	70						-1	20	4	a2	b1	1989.005859	326.5382385	1	1	0	0						85.95646872	6.139747766
FV1	foraging	visible	foragingvisible	80						-1	20	4	a2	b1	2041.609009	320.348114	1	1	0	0						52.9661121	3.783293722
FV1	foraging	visible	foragingvisible	90				1	c1		20	4	a1	b1	2060	295	1	0	0	0						31.31701508	2.236929648
FV1	foraging	visible	foragingvisible	110				1	c1		20	4	a	b2	2148	300	1	0	0	0						88.141931	6.295852214
FV1	foraging	visible	foragingvisible	120					c1		20	4	a	b2	2157	300	1	0	0	0						9	0.642857143
FV1	foraging	visible	foragingvisible	130				1	c1		20	4	a	b2	2202	315	1	0	0	0						47.4341649	3.388154636
FV1	foraging	visible	foragingvisible	140				1	c1		20	4	a1	b2	2220	313	1	0	0	0						18.11077028	1.293626448
FV1	foraging	visible	foragingvisible	150					c5		20	4	a2	b1	2256	336	1	0	0	0						42.72001873	3.051429909
FV1	foraging	visible	foragingvisible	160						-1	20	4	a2	b2	2230.461426	381.6156616	1	1	0	0						52.27817274	3.734155196
FV1	foraging	visible	foragingvisible	170					c4	-1	20	4	a1	b2	2215.262695	393.7528992	1	1	0	0						19.45029461	1.389306758
FV1	foraging	visible	foragingvisible	180					c4	-1	20	4	a1	b2	2257.48584	416.1004944	1	1	0	0						47.77247099	3.412319357
FV1	foraging	visible	foragingvisible	190						-1	4	4	a1	b1	2182.195801	421.8118896	1	1	1	0	4		4	1		75.5063574	5.393311243
FV1	foraging	visible	foragingvisible	200						-1	20	4	a2	b2	2188.163818	462.5776978	1	1	0	0						41.20034399	2.942881714
FV1	foraging	visible	foragingvisible	210						-1	20	4	a2	b	2161.489746	587.9945068	1	1	0	0						128.2220032	9.158714512
FV1	foraging	visible	foragingvisible	220						-1	20	4	a2	b	2248.141113	722.902832	1	1	0	0						160.3393764	11.4528126
FV1	foraging	visible	foragingvisible	230						-1	20	4	a1	b1	2421.355469	733.8543091	1	1	0	0						173.5602143	12.39715816
FV1	foraging	visible	foragingvisible	240						-1	20	4	a2	b	2633.335693	652.5302124	1	1	0	0						227.044542	16.21746729
FV1	foraging	visible	foragingvisible	60						5	5	5	a	b1	1955.129272	1474.828369	1	1	1	1	5	5	5	1	1	0	0
FV1	foraging	visible	foragingvisible	70						-1	5	5	a	b	1972.572266	1502.046509	1	1	1	0	5		5	1		32.32777729	2.30912695
FV1	foraging	visible	foragingvisible	80						5	5	5	a	b	1977.306763	1511.234863	1	1	1	1	5	5	5	1	1	10.33640707	0.738314791
FV1	foraging	visible	foragingvisible	90						-1	5	5	a	b1	1975.708008	1497.217896	1	1	1	0	5		5	1		14.10784822	1.007703444
FV1	foraging	visible	foragingvisible	100						-1	5	5	a1	b	1969.36377	1465.154297	1	1	1	0	5		5	1		32.68522199	2.334658714
FV1	foraging	visible	foragingvisible	110						-1	5	5	a	b	1902.233032	1499.055664	1	1	1	0	5		5	1		75.20531011	5.371807865
FV1	foraging	visible	foragingvisible	120						-1	5	5	a1	b	1825.458496	1609.939575	1	1	1	0	5		7	0		134.868718	9.633479858
FV1	foraging	visible	foragingvisible	130						-1	5	5	a1	b1	1863.207642	1778.365845	1	1	1	0	5		5	1		172.6047695	12.32891211
FV1	foraging	visible	foragingvisible	140						-1	5	5	a1	b1	1931.151855	1911.787598	1	1	1	0	5		5	1		149.7256833	10.69469167
FV1	foraging	visible	foragingvisible	150						5	5	5	a	b	1914.486328	1905.402344	1	1	1	1	5	5	5	1	1	17.84688373	1.274777409
FV1	foraging	visible	foragingvisible	160						5	5	5	a	b1	1913.230225	1881.205078	1	1	1	1	5	5	5	1	1	24.22984681	1.730703344
FV1	foraging	visible	foragingvisible	170						5	5	5	a1	b	1890.858398	1870.708252	1	1	1	1	5	5	5	1	1	24.71198089	1.765141492
FV1	foraging	visible	foragingvisible	180						5	5	5	a	b	1804.120239	1884.386597	1	1	1	1	5	5	5	1	1	87.81005266	6.272146619
FV1	foraging	visible	foragingvisible	190						5	5	5	a	b1	1784.599976	1862.393921	1	1	1	1	5	5	5	1	1	29.40609572	2.100435408
FV1	foraging	visible	foragingvisible	200						5	5	5	a	b	1783.603516	1837.712158	1	1	1	1	5	5	5	1	1	24.70186951	1.764419251
FV1	foraging	visible	foragingvisible	210						5	5	5	a	b1	1780.419067	1832.810913	1	1	1	1	5	5	5	1	1	5.844905302	0.417493236
FV1	foraging	visible	foragingvisible	220						5	20	5	a2	b2	1823.550049	1817.348999	1	1	0	1		5	5	0	1	45.81869043	3.272763602
FV1	foraging	visible	foragingvisible	230						5	20	5	a1	b1	1889.093506	1837.06604	1	1	0	1		5	5	0	1	68.44491553	4.888922538
FV1	foraging	visible	foragingvisible	240						5	20	5	a1	b1	1990.90271	1876.998657	1	1	0	1		5	5	0	1	109.360541	7.811467212
FV1	foraging	visible	foragingvisible	60						-1	20	6	a2	b1	2293.153076	463.9631958	1	1	0	0						0	0
FV1	foraging	visible	foragingvisible	70						-1	6	6	a1	b	2200.884277	417.2677002	1	1	1	0	6		6	1		103.411801	7.386557212
FV1	foraging	visible	foragingvisible	80						-1	6	6	a	b1	2168.405273	411.0921936	1	1	1	0	6		6	1		33.06089204	2.361492289
FV1	foraging	visible	foragingvisible	90						-1	6	6	a1	b2	2188.518555	411.9495544	1	1	1	0	6		6	1		20.13154689	1.437967635
FV1	foraging	visible	foragingvisible	100						-1	6	6	a1	b1	2184.011719	418.6451416	1	1	1	0	6		6	1		8.071087825	0.576506273
FV1	foraging	visible	foragingvisible	110						6	6	6	a1	b1	2137.446289	423.6037903	1	1	1	1	6	6	6	1	1	46.82870346	3.34490739
FV1	foraging	visible	foragingvisible	120						6	6	6	a1	b1	2158.095459	426.3599854	1	1	1	1	6	6	6	1	1	20.83230264	1.488021617
FV1	foraging	visible	foragingvisible	130						6	20	6	a2	b1	2068.980469	355.4489136	1	1	0	1		6	6	0	1	113.8853	8.134664283
FV1	foraging	visible	foragingvisible	140						6	6	6	a	b1	2024.589355	332.6558533	1	1	1	1	6	6	6	1	1	49.90084769	3.564346263
FV1	foraging	visible	foragingvisible	150						6	6	6	a	b1	1999.565674	323.2874451	1	1	1	1	6	6	6	1	1	26.71987431	1.908562451
FV1	foraging	visible	foragingvisible	160				1	c1		20	6	a	b2	2032	317	1	0	0	0						33.03812145	2.359865818
FV1	foraging	visible	foragingvisible	170				1	c1		20	6	a	b2	2034	308	1	0	0	0						9.219544457	0.65853889
FV1	foraging	visible	foragingvisible	180				1	c1		20	6	a	b2	2066	311	1	0	0	0						32.14031736	2.295736954
FV1	foraging	visible	foragingvisible	190				1	c1		20	6	a1	b2	2103	317	1	0	0	0						37.48332963	2.677380688
FV1	foraging	visible	foragingvisible	200				1	c1		20	6	a2	b2	2187	311	1	0	0	0						84.21401309	6.015286649
FV1	foraging	visible	foragingvisible	210				1			6	6	a1	b1	2245	317	1	0	1	0	6		6	1		58.30951895	4.164965639
FV1	foraging	visible	foragingvisible	220				1	c1		20	6	a1	b2	2241	313	1	0	0	0						5.656854249	0.404061018
FV1	foraging	visible	foragingvisible	230				1	c1		20	6	a1	b2	2220	300	1	0	0	0						24.69817807	1.764155576
FV1	foraging	visible	foragingvisible	240				1	c1		20	6	a1	b2	2179	304	1	0	0	0						41.19465985	2.942475703
FV1	foraging	visible	foragingvisible	60					c4	-1	20	7	a1	b2	2032.832886	352.3703308	1	1	0	0						0	0
FV1	foraging	visible	foragingvisible	70						-1	20	7	a2	b2	1991.120972	434.3057251	1	1	0	0						91.94178924	6.56727066
FV1	foraging	visible	foragingvisible	80						-1	20	7	a2	b	1930.363037	546.1439819	1	1	0	0						127.2765585	9.091182752
FV1	foraging	visible	foragingvisible	90					c5	-1	20	7	a2	b1	1801.904297	614.7858276	1	1	0	0						145.6480376	10.40343126
FV1	foraging	visible	foragingvisible	100						-1	20	7	a1	b2	1762.495728	727.9156494	1	1	0	0						119.797295	8.556949643
FV1	foraging	visible	foragingvisible	110						-1	20	7	a2	b2	1814.013916	799.4539185	1	1	0	0						88.15808324	6.297005946
FV1	foraging	visible	foragingvisible	120						-1	20	7	a1	b2	1797.880981	996.8231201	1	1	0	0						198.027456	14.14481829
FV1	foraging	visible	foragingvisible	130						-1	20	7	a2	b2	1766.75061	1154.170288	1	1	0	0						160.3971049	11.45693606
FV1	foraging	visible	foragingvisible	140						-1	20	7	a2	b2	1841.581055	1273.072998	1	1	0	0						140.490035	10.0350025
FV1	foraging	visible	foragingvisible	150						-1	20	7	a2	b2	2043.178101	1308.412109	1	1	0	0						204.6710085	14.61935775
FV1	foraging	visible	foragingvisible	160						-1	20	7	a2	b1	2213.763672	1258.731079	1	1	0	0						177.6728504	12.69091789
FV1	foraging	visible	foragingvisible	170					c5	-1	20	7	a2	b2	2281.120117	1131.587646	1	1	0	0						143.8830888	10.27736348
FV1	foraging	visible	foragingvisible	180						-1	20	7	a1	b2	2295.008301	970.7166138	1	1	0	0						161.4694109	11.53352935
FV1	foraging	visible	foragingvisible	190						-1	7	7	a1	b1	2338.307617	832.3318481	1	1	1	0	7		7	1		145.0006005	10.35718575
FV1	foraging	visible	foragingvisible	200						-1	20	7	a1	b1	2508.794189	734.4804688	1	1	0	0						196.5720317	14.04085941
FV1	foraging	visible	foragingvisible	210					c5	-1	20	7	a2	b1	2649.13501	564.5524902	1	1	0	0						220.3884388	15.74203134
FV1	foraging	visible	foragingvisible	220						-1	20	7	a2	b2	2611.258545	423.7031555	1	1	0	0						145.8532197	10.41808712
FV1	foraging	visible	foragingvisible	230						-1	20	7	a2	b1	2677.398682	383.3354797	1	1	0	0						77.48591467	5.534708191
FV1	foraging	visible	foragingvisible	240						-1	7	7	a1	b1	2672.700684	377.1550293	1	1	1	0	7		7	1		7.763320962	0.554522926
FV1	foraging	visible	foragingvisible	60						-1	8	8	a2	b	1319.392822	362.1578674	1	1	1	0	8		8	1		0	0
FV1	foraging	visible	foragingvisible	70						-1	8	8	a1	b1	1629.772339	386.5830688	1	1	1	0	8		8	1		311.3390998	22.23850713
FV1	foraging	visible	foragingvisible	80						-1	20	8	a2	b	1707.038452	364.9638367	1	1	0	0						80.23368005	5.730977147
FV1	foraging	visible	foragingvisible	90					c5	-1	20	8	a2	b	1992.382324	350.5402222	1	1	0	0						285.7081832	20.40772737
FV1	foraging	visible	foragingvisible	100						-1	8	8	a1	b1	2030.028809	345.1644592	1	1	1	0	8		8	1		38.02836653	2.716311895
FV1	foraging	visible	foragingvisible	110					c4	-1	20	8	a1	b2	1975.403198	348.7979126	1	1	0	0						54.74631824	3.910451303
FV1	foraging	visible	foragingvisible	120					c1	-1	20	8	a1	b2	1929.197144	325.6346436	1	1	0	0						51.68690798	3.691921999
FV1	foraging	visible	foragingvisible	130				1	c1		20	8	a	b2	1870	289	1	0	0	0						69.61608269	4.972577335
FV1	foraging	visible	foragingvisible	140				1	c1		20	8	a1	b2	1872	304	1	0	0	0						15.13274595	1.080910425
FV1	foraging	visible	foragingvisible	150				1	c1		20	8	a1	b2	1846	302	1	0	0	0						26.07680962	1.862629259
FV1	foraging	visible	foragingvisible	160						-1	8	8	a1	b	1802.844238	362.0155945	1	1	1	0	8		8	1		73.92084535	5.280060382
FV1	foraging	visible	foragingvisible	170					c5	-1	20	8	a2	b	1373.436401	513.0161743	1	1	0	0						455.1837712	32.51312652
FV1	foraging	visible	foragingvisible	180						-1	20	8	a2	b	1017.505737	702.5368652	1	1	0	0						403.2427679	28.80305485
FV1	foraging	visible	foragingvisible	190						-1	8	8	a	b1	943.3237305	1064.588135	1	1	1	0	8		8	1		369.5728508	26.39806077
FV1	foraging	visible	foragingvisible	200						13	8	8	a	b	876.2173462	1040.649658	1	1	1	1	8	13	8	1	0	71.24828065	5.089162903
FV1	foraging	visible	foragingvisible	210				1	c1		20	8	a	b2	812	1012	1	0	0	0						70.31835078	5.022739341
FV1	foraging	visible	foragingvisible	220				1	c1		20	8	a1	b2	810	1003	1	0	0	0						9.219544457	0.65853889
FV1	foraging	visible	foragingvisible	230					c5	-1	20	8	a2	b	905.7869263	1155.389771	1	1	0	0						179.9938264	12.85670189
FV1	foraging	visible	foragingvisible	240					c5	-1	20	8	a2	b	944.4343262	1577.994019	1	1	0	0						424.367732	30.31198086
FV1	foraging	visible	foragingvisible	60						-1	9	9	a1	b1	2998.310059	1126.780396	1	1	1	0	9		9	1		0	0
FV1	foraging	visible	foragingvisible	70					c5	-1	20	9	a2	b	3016.342529	1338.028564	1	1	0	0						212.0164108	15.14402934
FV1	foraging	visible	foragingvisible	80						-1	20	9	a2	b1	3117.250732	1911.435425	1	1	0	0						582.2180809	41.58700578
FV1	foraging	visible	foragingvisible	90					c5	-1	20	9	a2	b	2669.005615	1936.261353	1	1	0	0						448.9320791	32.06657708
FV1	foraging	visible	foragingvisible	100						-1	9	9	a	b1	2260.897461	1918.409302	1	1	1	0	9		9	1		408.4984224	29.17845874
FV1	foraging	visible	foragingvisible	110					c5	-1	20	9	a2	b	2023.73938	1945.082031	1	1	0	0						238.6532838	17.04666313
FV1	foraging	visible	foragingvisible	120						-1	20	9	a2	b	1626.371094	1672.467285	1	1	0	0						481.8924719	34.42089085
FV1	foraging	visible	foragingvisible	130					c5	-1	20	9	a2	b	1640.729736	1232.28479	1	1	0	0						440.4166204	31.45833003
FV1	foraging	visible	foragingvisible	140					c5	-1	20	9	a2	b	1513.823242	734.5737915	1	1	0	0						513.6355675	36.68825482
FV1	foraging	visible	foragingvisible	150					c5	-1	20	9	a2	b	1502.00415	523.3733521	1	1	0	0						211.5308879	15.10934914
FV1	foraging	visible	foragingvisible	160					c5		20	9	a2	b	1158	1269	1	0	0	0						821.1564731	58.65403379
FV1	foraging	visible	foragingvisible	170						-1	9	9	a	b1	974.2126465	1404.632324	1	1	1	0	9		9	1		228.4161085	16.31543632
FV1	foraging	visible	foragingvisible	180						-1	9	9	a	b1	986.6876221	1409.573486	1	1	1	0	9		9	1		13.41790215	0.958421582
FV1	foraging	visible	foragingvisible	190					c5	-1	9	9	a1	b1	945.4810791	1392.351807	1	1	1	0	9		9	1		44.66055769	3.190039835
FV1	foraging	visible	foragingvisible	200						-1	9	9	a	b1	869.5164795	1190.970215	1	1	1	0	9		9	1		215.2328181	15.37377272
FV1	foraging	visible	foragingvisible	210					c5	-1	20	9	a2	b	887.923645	1409.514771	1	1	0	0						219.3183684	15.66559774
FV1	foraging	visible	foragingvisible	220						-1	20	9	a1	b	877.9975586	1912.274902	1	1	0	0						502.8581077	35.91843627
FV1	foraging	visible	foragingvisible	230		3			c1		20	9	a	b2	860	1983	1	0	0	0						72.97911758	5.212794113
FV1	foraging	visible	foragingvisible	240				1	c1		20	9	a	b2	873	2005	1	0	0	0						25.55386468	1.825276048
FV1	foraging	visible	foragingvisible	60							10	10	a2	b1	2852	328	1	0	1	0	10		10	1		0	0
FV1	foraging	visible	foragingvisible	70		1					10	10	a	b	2800	323	1	0	1	0	10		10	1		52.23983155	3.731416539
FV1	foraging	visible	foragingvisible	80						-1	10	10	a	b1	2793.34375	321.0042419	1	1	1	0	10		10	1		6.949008163	0.496357726
FV1	foraging	visible	foragingvisible	90						-1	20	10	a2	b1	2603.413574	363.664093	1	1	0	0						194.6621038	13.90443598
FV1	foraging	visible	foragingvisible	100						-1	10	10	a1	b1	2380.264404	443.4207764	1	1	1	0	10		10	1		236.9740083	16.92671488
FV1	foraging	visible	foragingvisible	110						10	10	10	a	b	2350.051514	482.7272644	1	1	1	1	10	10	10	1	1	49.57639278	3.541170913
FV1	foraging	visible	foragingvisible	120						10	20	10	a2	b	2379.902344	554.598999	1	1	0	1		10	10	0	1	77.82427826	5.558877018
FV1	foraging	visible	foragingvisible	130						10	20	10	a2	b	2445.474609	892.293396	1	1	0	1		10	10	0	1	344.0017844	24.57155603
FV1	foraging	visible	foragingvisible	140							20	10	a2	b	2599	1133	1	0	0	0						285.4990629	20.3927902
FV1	foraging	visible	foragingvisible	150					c5	-1	20	10	a2	b	2535.725586	1600.304688	1	1	0	0						471.5690012	33.68350009
FV1	foraging	visible	foragingvisible	160						-1	10	10	a	b	2697.725098	1930.699829	1	1	1	0	10		10	1		367.9739	26.28385
FV1	foraging	visible	foragingvisible	170						-1	10	10	a	b	2745.362793	1907.745117	1	1	1	0	10		10	1		52.87975783	3.777125559
FV1	foraging	visible	foragingvisible	180						-1	20	10	a2	b	2322.931396	1911.729126	1	1	0	0						422.4501835	30.1750131
FV1	foraging	visible	foragingvisible	190					c5	-1	20	10	a2	b1	2006.367798	1931.825562	1	1	0	0						317.2008485	22.65720347
FV1	foraging	visible	foragingvisible	200					c5	-1	10	10	a2	b	1711.831421	1948.396851	1	1	1	0	10		10	1		295.002178	21.07158414
FV1	foraging	visible	foragingvisible	210					c5	-1	20	10	a2	b	1392.742188	1940.239746	1	1	0	0						319.1934789	22.79953421
FV1	foraging	visible	foragingvisible	220						-1	10	10	a1	b	983.0215454	1951.115234	1	1	1	0	10		10	1		409.8649548	29.2760682
FV1	foraging	visible	foragingvisible	230		3				-1	10	10	a	b	916.0640259	1970.295288	1	1	1	0	10		10	1		69.6504407	4.975031478
FV1	foraging	visible	foragingvisible	240						-1	10	10	a	b	918.2698364	1981.755005	1	1	1	0	10		10	1		11.67007771	0.833576979
FV1	foraging	visible	foragingvisible	60						-1	11	11	a1	b1	1084.263916	526.0973511	1	1	1	0	11		11	1		0	0
FV1	foraging	visible	foragingvisible	70						-1	20	11	a2	b	1065.054565	656.1671753	1	1	0	0						131.4806386	9.391474188
FV1	foraging	visible	foragingvisible	80					c5	-1	20	11	a2	b1	922.6547241	416.386261	1	1	0	0						278.8773952	19.91981394
FV1	foraging	visible	foragingvisible	90						-1	20	11	a1	b	904.2265015	390.2459717	1	1	0	0						31.98302851	2.284502037
FV1	foraging	visible	foragingvisible	100						-1	11	11	a	b1	916.2311401	416.2896423	1	1	1	0	11		11	1		28.67724056	2.048374326
FV1	foraging	visible	foragingvisible	110						-1	11	11	a	b1	932.9380493	416.9307861	1	1	1	0	11		11	1		16.71920693	1.194229066
FV1	foraging	visible	foragingvisible	120		2				11	11	11	a	b	946.526062	398.1197205	1	1	1	1	11	11	11	1	1	23.2053933	1.657528093
FV1	foraging	visible	foragingvisible	130		2				11	11	11	a	b1	969.0557251	412.576416	1	1	1	1	11	11	11	1	1	26.76904489	1.912074635
FV1	foraging	visible	foragingvisible	140						11	11	11	a	b1	921.6065674	414.0342102	1	1	1	1	11	11	11	1	1	47.47154653	3.390824752
FV1	foraging	visible	foragingvisible	150						11	11	11	a	b	927.0130005	411.7528992	1	1	1	1	11	11	11	1	1	5.868040452	0.419145747
FV1	foraging	visible	foragingvisible	160						11	11	11	a2	b1	1030.275024	388.9142456	1	1	1	1	11	11	11	1	1	105.7575037	7.554107409
FV1	foraging	visible	foragingvisible	170						11	20	11	a2	b	1158.317871	386.3515015	1	1	0	1		11	11	0	1	128.0684908	9.14774934
FV1	foraging	visible	foragingvisible	180						11	20	11	a2	b	1379.287476	376.3359375	1	1	0	1		11	11	0	1	221.1964689	15.79974778
FV1	foraging	visible	foragingvisible	190						11	11	11	a1	b1	1549.010864	398.3851929	1	1	1	1	11	11	11	1	1	171.1496366	12.22497404
FV1	foraging	visible	foragingvisible	200						11	20	11	a2	b	1293.245239	387.3730774	1	1	0	1		11	11	0	1	256.0025813	18.28589866
FV1	foraging	visible	foragingvisible	210						11	11	11	a	b1	900.4902954	390.9065552	1	1	1	1	11	11	11	1	1	392.770838	28.05505986
FV1	foraging	visible	foragingvisible	220						11	11	11	a	b	890.713501	392.4220886	1	1	1	1	11	11	11	1	1	9.893561049	0.706682932
FV1	foraging	visible	foragingvisible	230						11	20	11	a1	b1	878.7731934	430.3492432	1	1	0	1		11	11	0	1	39.76229372	2.840163837
FV1	foraging	visible	foragingvisible	240						-1	11	11	a	b1	853.6782227	494.0750427	1	1	1	0	11		11	1		68.48894127	4.892067234
FV1	foraging	visible	foragingvisible	60					c5	-1	20	13	a2	b	2136.133545	997.8295898	1	1	0	0						0	0
FV1	foraging	visible	foragingvisible	70					c5	-1	20	13	a2	b	1738.578491	480.1309204	1	1	0	0						652.734198	46.62387129
FV1	foraging	visible	foragingvisible	80						-1	20	13	a2	b	1704.95813	455.4847412	1	1	0	0						41.6864825	2.977605893
FV1	foraging	visible	foragingvisible	90						-1	13	13	a	b	1648.6521	411.3907166	1	1	1	0	13		13	1		71.51679537	5.108342526
FV1	foraging	visible	foragingvisible	100					c5	-1	20	13	a	b2	1442.289429	395.7386169	1	1	0	0						206.9554063	14.78252902
FV1	foraging	visible	foragingvisible	110						-1	20	13	a2	b1	1083.680176	492.0672302	1	1	0	0						371.3216908	26.52297792
FV1	foraging	visible	foragingvisible	120						-1	13	13	a	b1	890.6105957	755.4655762	1	1	1	0	13		13	1		326.5800844	23.32714888
FV1	foraging	visible	foragingvisible	130					c5	-1	20	13	a2	b	947.2852173	1091.50415	1	1	0	0						340.7842951	24.34173537
FV1	foraging	visible	foragingvisible	140						-1	13	13	a1	b1	892.3757935	1513.168457	1	1	1	0	13		13	1		425.2244497	30.37317498
FV1	foraging	visible	foragingvisible	150						-1	13	13	a	b1	900.5023804	1810.331543	1	1	1	0	13		13	1		297.274185	21.23387036
FV1	foraging	visible	foragingvisible	160						-1	20	13	a2	b1	974.8881226	1938.777344	1	1	0	0						148.4303286	10.60216633
FV1	foraging	visible	foragingvisible	170						-1	20	13	a2	b	892.4989014	1811.085815	1	1	0	0						151.9641746	10.8545839
FV1	foraging	visible	foragingvisible	180						-1	13	13	a1	b	884.5490723	1445.022705	1	1	1	0	13		13	1		366.1494234	26.15353025
FV1	foraging	visible	foragingvisible	190						13	13	13	a	b1	927.0886841	1205.688599	1	1	1	1	13	13	13	1	1	243.0852379	17.36323128
FV1	foraging	visible	foragingvisible	200						-1	13	13	a	b	1006.500488	1192.078003	1	1	1	0	13		13	1		80.56973949	5.754981392
FV1	foraging	visible	foragingvisible	210						-1	13	13	a1	b	924.0628662	1069.779663	1	1	1	0	13		13	1		147.4884587	10.53488991
FV1	foraging	visible	foragingvisible	220						-1	13	13	a	b	883.0233765	986.5822144	1	1	1	0	13		13	1		92.76882649	6.626344749
FV1	foraging	visible	foragingvisible	230					c5	-1	2	13	a2	b	884.0374756	633.5413208	1	1	1	0	2		13	0		353.0423501	25.21731072
FV1	foraging	visible	foragingvisible	240						11	13	13	a1	b	910.7952271	419.4981689	1	1	1	1	13	11	13	1	0	215.7091749	15.40779821
FV1	foraging	visible	foragingvisible	60					c5	-1	20	14	a2	b2	2380.45166	1900.558716	1	1	0	0						0	0
FV1	foraging	visible	foragingvisible	70					c5	-1	20	14	a2	b2	1914.422485	1915.709351	1	1	0	0						466.275384	33.30538457
FV1	foraging	visible	foragingvisible	80					c5	-1	20	14	a2	b	1268.667603	1934.52832	1	1	0	0						646.0290405	46.14493147
FV1	foraging	visible	foragingvisible	90					c5	-1	20	14	a2	b	1432.117432	1933.426147	1	1	0	0						163.453545	11.67525322
FV1	foraging	visible	foragingvisible	100						-1	14	14	a	b1	2106.089111	1914.914795	1	1	1	0	14		14	1		674.2258481	48.15898915
FV1	foraging	visible	foragingvisible	110					c5	-1	20	14	a2	b	2273.489014	1639.075439	1	1	0	0						322.6609332	23.04720952
FV1	foraging	visible	foragingvisible	120					c5	-1	20	14	a2	b	2827.789795	1475.358398	1	1	0	0						577.9728586	41.28377562
FV1	foraging	visible	foragingvisible	130						-1	20	14	a2	b1	3126.095947	1232.461548	1	1	0	0						384.6887574	27.47776838
FV1	foraging	visible	foragingvisible	140						-1	20	14	a2	b	3117.002686	803.0072632	1	1	0	0						429.5505443	30.68218174
FV1	foraging	visible	foragingvisible	150						-1	20	14	a2	b1	3105.233887	378.269104	1	1	0	0						424.901175	30.35008393
FV1	foraging	visible	foragingvisible	160						-1	20	14	a2	b2	2966.626221	345.609314	1	1	0	0						142.4034654	10.1716761
FV1	foraging	visible	foragingvisible	170						-1	20	14	a2	b2	2928.351074	328.3437195	1	1	0	0						41.98913706	2.999224076
FV1	foraging	visible	foragingvisible	180				1	c1		20	14	a	b2	2972	311	1	0	0	0						46.96842926	3.354887804
FV1	foraging	visible	foragingvisible	200				1	c1		20	14	a2	b2	2850	295	1	0	0	0						123.0447073	8.788907666
FV1	foraging	visible	foragingvisible	210					c5	-1	20	14	a2	b2	2609.557861	345.8645935	1	1	0	0						245.7633599	17.55452571
FV1	foraging	visible	foragingvisible	220					c5	-1	20	14	a2	b1	2356.600098	386.927887	1	1	0	0						256.269046	18.30493186
FV1	foraging	visible	foragingvisible	230						-1	11	14	a1	b1	2264.711182	429.645874	1	1	1	0	11		14	0		101.3331106	7.238079326
FV1	foraging	visible	foragingvisible	240						-1	20	14	a1	b1	2271.63623	422.2287598	1	1	0	0						10.1474072	0.7248148
FV1	foraging	visible	foragingvisible	60						-1	15	15	a1	b1	3064.482422	1223.329712	1	1	1	0	15		15	1		0	0
FV1	foraging	visible	foragingvisible	70					c5	-1	20	15	a2	b	3030.436523	1138.826538	1	1	0	0						91.10383996	6.50741714
FV1	foraging	visible	foragingvisible	80						-1	20	15	a2	b	2873.327393	1175.262573	1	1	0	0						161.2788373	11.51991695
FV1	foraging	visible	foragingvisible	90					c5	-1	20	15	a2	b1	3083.725342	1273.848877	1	1	0	0						232.3500727	16.59643376
FV1	foraging	visible	foragingvisible	100						15	15	15	a1	b1	3125.349854	1238.401001	1	1	1	1	15	15	15	1	1	54.67313702	3.905224073
FV1	foraging	visible	foragingvisible	110				1	c1		20	15	a	b2	3210	1206	1	0	0	0						90.63924141	6.474231529
FV1	foraging	visible	foragingvisible	120					c1		20	15	a1	b2	3193	1195	1	0	0	0						20.24845673	1.446318338
FV1	foraging	visible	foragingvisible	130				1	c1		20	15	a	b2	3178	1144	1	0	0	0						53.16013544	3.797152531
FV1	foraging	visible	foragingvisible	140						-1	20	15	a2	b1	3140.734619	1029.742798	1	1	0	0						120.1807673	8.584340522
FV1	foraging	visible	foragingvisible	150					c5	-1	20	15	a2	b	3127.242676	701.2783813	1	1	0	0						328.7413962	23.4815283
FV1	foraging	visible	foragingvisible	160						-1	15	15	a1	b1	3103.19751	376.7353516	1	1	1	0	15		15	1		325.4325554	23.24518253
FV1	foraging	visible	foragingvisible	170						-1	20	15	a2	b1	3055.422852	382.7913818	1	1	0	0						48.15696677	3.439783341
FV1	foraging	visible	foragingvisible	180						-1	15	15	a1	b1	3041.375	398.0078735	1	1	1	0	15		15	1		20.70950906	1.479250647
FV1	foraging	visible	foragingvisible	190						-1	15	15	a	b1	2931.810547	384.0275574	1	1	1	0	15		15	1		110.452789	7.889484929
FV1	foraging	visible	foragingvisible	200						-1	15	15	a	b1	2911.31543	381.3606262	1	1	1	0	15		15	1		20.66790611	1.476279008
FV1	foraging	visible	foragingvisible	210						-1	15	15	a	b1	2915.797363	384.3512878	1	1	1	0	15		15	1		5.388114719	0.384865337
FV1	foraging	visible	foragingvisible	220						-1	20	15	a1	b1	2927.35376	410.6610718	1	1	0	0						28.73595389	2.052568135
FV1	foraging	visible	foragingvisible	230						-1	15	15	a1	b1	2909.264648	443.3095703	1	1	1	0	15		15	1		37.32479641	2.666056887
FV1	foraging	visible	foragingvisible	240						-1	15	15	a1	b1	2871.185547	466.1654358	1	1	1	0	15		15	1		44.4118061	3.172271864
FV1	foraging	visible	foragingvisible	60					c5	-1	20	16	a2	b1	2889.574951	498.5652161	1	1	0	0						0	0
FV1	foraging	visible	foragingvisible	70						16	20	16	a2	b	2939.696533	500.2189941	1	1	0	1		16	16	0	1	50.14885805	3.582061289
FV1	foraging	visible	foragingvisible	80						16	16	16	a	b1	3016.114746	483.2206726	1	1	1	1	16	16	16	1	1	78.28592601	5.591851858
FV1	foraging	visible	foragingvisible	90						16	16	16	a1	b	3076.090576	485.7861938	1	1	1	1	16	16	16	1	1	60.03067618	4.287905442
FV1	foraging	visible	foragingvisible	100						16	16	16	a	b1	3130.212158	448.7895508	1	1	1	1	16	16	16	1	1	65.55834982	4.682739273
FV1	foraging	visible	foragingvisible	110						16	20	16	a2	b2	3145.88916	414.2153015	1	1	0	1		16	16	0	1	37.96244337	2.711603098
FV1	foraging	visible	foragingvisible	120					c1		20	16	a1	b2	3171	390	1	0	0	0						34.88459706	2.491756933
FV1	foraging	visible	foragingvisible	130				1	c1		20	16	a1	b2	3195	364	1	0	0	0						35.38361203	2.527400859
FV1	foraging	visible	foragingvisible	140				1	c1		20	16	a1	b2	3217	399	1	0	0	0						41.34005322	2.952860944
FV1	foraging	visible	foragingvisible	150				1	c1		20	16	a	b2	3232	434	1	0	0	0						38.07886553	2.719918966
FV1	foraging	visible	foragingvisible	160				1	c1		20	16	a1	b2	3195	449	1	0	0	0						39.92492956	2.851780683
FV1	foraging	visible	foragingvisible	170				1	c1		20	16	a1	b2	3195	434	1	0	0	0						15	1.071428571
FV1	foraging	visible	foragingvisible	180				1	c1		20	16	a1	b2	3208	395	1	0	0	0						41.10960958	2.936400684
FV1	foraging	visible	foragingvisible	190				1	c1		20	16	a1	b2	3229	377	1	0	0	0						27.65863337	1.975616669
FV1	foraging	visible	foragingvisible	200				1	c1		20	16	a1	b2	3225	375	1	0	0	0						4.472135955	0.319438282
FV1	foraging	visible	foragingvisible	210				1	c1		20	16	a1	b2	3236	369	1	0	0	0						12.52996409	0.894997435
FV1	foraging	visible	foragingvisible	220				1	c1		20	16	a1	b2	3236	364	1	0	0	0						5	0.357142857
FV1	foraging	visible	foragingvisible	230				1	c1		20	16	a	b2	3229	352	1	0	0	0						13.89244399	0.992317428
FV1	foraging	visible	foragingvisible	240				1	c1		20	16	a	b2	3232	295	1	0	0	0						57.07889277	4.077063769
FV1	foraging	visible	foragingvisible	60				1	c1		17	17	a1	b1	2858	295	1	0	1	0	17		17	1		0	0
FV1	foraging	visible	foragingvisible	70					c1		17	17	a	b1	2841	295	1	0	1	0	17		17	1		17	1.214285714
FV1	foraging	visible	foragingvisible	80				1	c1		17	17	a	b1	2839	295	1	0	1	0	17		17	1		2	0.142857143
FV1	foraging	visible	foragingvisible	90				1	c1		17	17	a	b1	2850	287	1	0	1	0	17		17	1		13.60147051	0.971533608
FV1	foraging	visible	foragingvisible	100				1	c1		17	17	a	b1	2856	298	1	0	1	0	17		17	1		12.52996409	0.894997435
FV1	foraging	visible	foragingvisible	110				1	c1		17	17	a1	b1	2841	289	1	0	1	0	17		17	1		17.49285568	1.249489692
FV1	foraging	visible	foragingvisible	120					c1		17	17	a	b1	2822	308	1	0	1	0	17		17	1		26.87005769	1.919289835
FV1	foraging	visible	foragingvisible	130				1	c1		17	17	a	b1	2856	291	1	0	1	0	17		17	1		38.01315562	2.715225401
FV1	foraging	visible	foragingvisible	140				1	c1		17	17	a	b1	2860	276	1	0	1	0	17		17	1		15.5241747	1.108869621
FV1	foraging	visible	foragingvisible	150				1	c1		17	17	a	b1	2850	293	1	0	1	0	17		17	1		19.72308292	1.408791637
FV1	foraging	visible	foragingvisible	160				1	c1		17	17	a1	b1	2852	289	1	0	1	0	17		17	1		4.472135955	0.319438282
FV1	foraging	visible	foragingvisible	170				1	c1		17	17	a1	b2	2856	287	1	0	1	0	17		17	1		4.472135955	0.319438282
FV1	foraging	visible	foragingvisible	180				1	c1		17	17	a1	b1	2854	289	1	0	1	0	17		17	1		2.828427125	0.202030509
FV1	foraging	visible	foragingvisible	190				1	c1		17	17	a1	b1	2893	289	1	0	1	0	17		17	1		39	2.785714286
FV1	foraging	visible	foragingvisible	190				1	c1		20	17	a2	b2	2914	291	1	0	0	0						21.09502311	1.506787365
FV1	foraging	visible	foragingvisible	210				1	c1		17	17	a1	b1	2852	317	1	0	1	0	17		17	1		67.23094526	4.802210375
FV1	foraging	visible	foragingvisible	220							17	17	a1	b1	2893	321	1	0	1	0	17		17	1		41.19465985	2.942475703
FV1	foraging	visible	foragingvisible	230						-1	17	17	a	b1	2948.477783	346.0396423	1	1	1	0	17		17	1		60.86680617	4.347629012
FV1	foraging	visible	foragingvisible	240						-1	17	17	a	b1	3055.656494	388.8258667	1	1	1	0	17		17	1		115.4033669	8.243097635
FV1	foraging	visible	foragingvisible	60						-1	20	18	a2	b	912.0847168	1196.629395	1	1	0	0						0	0
FV1	foraging	visible	foragingvisible	70						-1	18	18	a	b	892.2202148	922.039856	1	1	1	0	18		18	1		275.3071255	19.66479468
FV1	foraging	visible	foragingvisible	80						-1	20	18	a2	b	995.4414673	682.9278564	1	1	0	0						260.4403489	18.60288206
FV1	foraging	visible	foragingvisible	90						-1	20	18	a1	b	1096.644897	493.9144897	1	1	0	0						214.4019286	15.31442347
FV1	foraging	visible	foragingvisible	100						-1	18	18	a	b	1035.140381	413.483551	1	1	1	0	18		18	1		101.251871	7.232276503
FV1	foraging	visible	foragingvisible	110						-1	18	18	a	b	992.1035156	393.8905029	1	1	1	0	18		18	1		47.28698888	3.377642063
FV1	foraging	visible	foragingvisible	120		2					18	18	a	b	951	360	1	0	1	0	18		18	1		53.27349417	3.805249584
FV1	foraging	visible	foragingvisible	130		2					18	18	a1	b1	994	403	1	0	1	0	18		18	1		60.81118318	4.343655942
FV1	foraging	visible	foragingvisible	140						-1	20	18	a2	b1	902.6135864	622.8406982	1	1	0	0						238.0785777	17.0056127
FV1	foraging	visible	foragingvisible	150					c5	-1	20	18	a2	b1	901.8197021	896.6126709	1	1	0	0						273.7731238	19.55522313
FV1	foraging	visible	foragingvisible	160						-1	20	18	a2	b1	990.722168	1196.62915	1	1	0	0						312.9113871	22.35081336
FV1	foraging	visible	foragingvisible	170						-1	18	18	a1	b1	1010.234619	1272.5896	1	1	1	0	18		18	1		78.42656252	5.601897323
FV1	foraging	visible	foragingvisible	180					c5	-1	20	18	a2	b1	1177.877197	1336.146729	1	1	0	0						179.2862031	12.80615736
FV1	foraging	visible	foragingvisible	190					c5	-1	20	18	a2	b1	1496.187744	1434.138794	1	1	0	0						333.0526222	23.78947301
FV1	foraging	visible	foragingvisible	200					c5	-1	20	18	a2	b	1814.92041	1545.847412	1	1	0	0						337.7415102	24.12439359
FV1	foraging	visible	foragingvisible	210							20	18	a2	b1	2090	1705	1	0	0	0						317.8023397	22.70016712
FV1	foraging	visible	foragingvisible	220						-1	18	18	a	b	2185.464355	1910.300903	1	1	1	0	18		18	1		226.4109181	16.17220844
FV1	foraging	visible	foragingvisible	230						18	20	18	a2	b2	2153.319336	1972.235718	1	1	0	1		18	18	0	1	69.77982198	4.984272999
FV1	foraging	visible	foragingvisible	240				1	c1		20	18	a2	b2	2062	1998	1	0	0	0						94.88424187	6.777445848
FV1	foraging	visible	foragingvisible	60						-1	20	19	a2	b1	2966.749512	386.1939697	1	1	0	0						0	0
FV1	foraging	visible	foragingvisible	70						-1	19	19	a	b1	2981.141602	388.1778259	1	1	1	0	19		19	1		14.52817745	1.037726961
FV1	foraging	visible	foragingvisible	80						-1	19	19	a	b	3096.134277	363.0263062	1	1	1	0	19		19	1		117.7111475	8.407939107
FV1	foraging	visible	foragingvisible	90						-1	20	19	a2	b1	3075.629883	362.319458	1	1	0	0						20.51657398	1.46546957
FV1	foraging	visible	foragingvisible	100						-1	20	19	a2	b1	2919.323486	376.7022095	1	1	0	0						156.9667267	11.21190905
FV1	foraging	visible	foragingvisible	110					c5	1	20	19	a2	b1	2718.031006	428.3996277	1	1	0	1		1	19	0	0	207.8251321	14.8446523
FV1	foraging	visible	foragingvisible	120					c5	1	20	19	a2	b	2525.311523	379.212616	1	1	0	1		1	19	0	0	198.8973636	14.20695454
FV1	foraging	visible	foragingvisible	130					c5	1	20	19	a2	b	2209.999756	427.7458801	1	1	0	1		1	19	0	0	319.0250588	22.7875042
FV1	foraging	visible	foragingvisible	140						1	19	19	a1	b1	2064.870117	419.0151062	1	1	1	1	19	1	19	1	0	145.3920167	10.38514405
FV1	foraging	visible	foragingvisible	150						1	19	19	a	b1	2040.11499	433.2823486	1	1	1	1	19	1	19	1	0	28.57219835	2.040871311
FV1	foraging	visible	foragingvisible	160						1	19	19	a	b1	2037.406494	435.1016541	1	1	1	1	19	1	19	1	0	3.262793754	0.233056697
FV1	foraging	visible	foragingvisible	170						1	19	19	a	b1	2038.608154	434.8492126	1	1	1	1	19	1	19	1	0	1.227889843	0.087706417
FV1	foraging	visible	foragingvisible	180						1	19	19	a	b1	2072.548828	449.8056641	1	1	1	1	19	1	19	1	0	37.08995542	2.64928253
FV1	foraging	visible	foragingvisible	190						1	19	19	a1	b1	2127.143799	495.5077515	1	1	1	1	19	1	19	1	0	71.19895822	5.085639873
FV1	foraging	visible	foragingvisible	200					c5	1	20	19	a2	b	2194.959473	630.3601685	1	1	0	1		1	19	0	0	150.9441619	10.78172585
FV1	foraging	visible	foragingvisible	210						1	19	19	a	b1	2245.658203	851.336731	1	1	1	1	19	1	19	1	0	226.7178917	16.19413512
FV1	foraging	visible	foragingvisible	220						1	20	19	a2	b	2151.228271	919.0849609	1	1	0	1		1	19	0	0	116.2189086	8.301350613
FV1	foraging	visible	foragingvisible	230					c5		20	19	a2	b	2036	980	1	0	0	0						130.3387756	9.309912543
FV1	foraging	visible	foragingvisible	240						-1	20	19	a2	b	1700.599854	1094.744141	1	1	0	0						354.4848034	25.3203431
FV2	foraging	visible	foragingvisible	60						-1	20	0	a2	b	1377.027466	353.7946777	1	1	0	0						0	0
FV2	foraging	visible	foragingvisible	70						-1	20	0	a1	b	1303.557495	359.1986389	1	1	0	0						73.6684426	5.262031614
FV2	foraging	visible	foragingvisible	80						-1	0	0	a	b	1055.144043	397.8418884	1	1	1	0	0		0	1		251.4011612	17.9572258
FV2	foraging	visible	foragingvisible	90						-1	0	0	a	b	908.7838135	399.5865479	1	1	1	0	0		0	1		146.3706276	10.45504483
FV2	foraging	visible	foragingvisible	100						-1	20	0	a2	b	875.9545898	494.7990723	1	1	0	0						100.7133692	7.193812084
FV2	foraging	visible	foragingvisible	110						-1	0	0	a1	b1	867.4752808	762.125061	1	1	1	0	0		0	1		267.4604324	19.1043166
FV2	foraging	visible	foragingvisible	120					c5	-1	20	0	a2	b	869.024353	1140.154175	1	1	0	0						378.0322878	27.00230627
FV2	foraging	visible	foragingvisible	130						-1	20	0	a2	b1	888.0186157	1591.949219	1	1	0	0						452.1941439	32.29958171
FV2	foraging	visible	foragingvisible	140						-1	0	0	a	b	868.3304443	1782.268311	1	1	1	0	0		0	1		191.3347351	13.6667668
FV2	foraging	visible	foragingvisible	150						-1	0	0	a	b1	865.6140747	1770.810547	1	1	1	0	0		0	1		11.77535646	0.84109689
FV2	foraging	visible	foragingvisible	160						-1	0	0	a	b1	863.1188354	1773.6698	1	1	1	0	0		0	1		3.794937006	0.271066929
FV2	foraging	visible	foragingvisible	170						-1	0	0	a	b1	860.6350098	1775.118652	1	1	1	0	0		0	1		2.87551069	0.205393621
FV2	foraging	visible	foragingvisible	180						-1	0	0	a	b1	863.7988892	1772.560547	1	1	1	0	0		0	1		4.068664898	0.290618921
FV2	foraging	visible	foragingvisible	190						-1	0	0	a	b1	865.7888794	1771.927856	1	1	1	0	0		0	1		2.08814724	0.149153374
FV2	foraging	visible	foragingvisible	200						-1	0	0	a	b1	863.0140991	1771.197754	1	1	1	0	0		0	1		2.869225443	0.204944675
FV2	foraging	visible	foragingvisible	210						-1	0	0	a	b1	866.2310181	1770.681885	1	1	1	0	0		0	1		3.258019134	0.232715652
FV2	foraging	visible	foragingvisible	220						-1	0	0	a	b1	872.0701294	1772.257324	1	1	1	0	0		0	1		6.047911112	0.431993651
FV2	foraging	visible	foragingvisible	230						-1	0	0	a	b1	864.6528931	1774.277588	1	1	1	0	0		0	1		7.687448274	0.549103448
FV2	foraging	visible	foragingvisible	240						0	0	0	a	b1	874.4215698	1767.331055	1	1	1	0	0	0	0	1		11.9867162	0.856194014
FV2	foraging	visible	foragingvisible	60						-1	20	1	a1	b	2969.313477	395.2886658	1	1	0	0						0	0
FV2	foraging	visible	foragingvisible	70		1				-1	1	1	a	b1	2954.915039	387.9304199	1	1	1	0	1		1	1		16.16968768	1.154977691
FV2	foraging	visible	foragingvisible	80		1				-1	1	1	a	b1	2955.521973	389.8351135	1	1	1	0	1		1	1		1.999056425	0.142789745
FV2	foraging	visible	foragingvisible	90		1				-1	1	1	a	b1	2952.299316	388.7130127	1	1	1	0	1		1	1		3.41242265	0.243744475
FV2	foraging	visible	foragingvisible	100		1				-1	1	1	a	b	2953.871582	389.6595764	1	1	1	0	1		1	1		1.835212035	0.131086574
FV2	foraging	visible	foragingvisible	110		1				-1	1	1	a	b	2955.275391	386.214447	1	1	1	0	1		1	1		3.720160788	0.265725771
FV2	foraging	visible	foragingvisible	120		1					1	1	a	b1	2949	387	1	0	1	0	1		1	1		6.324367614	0.451740544
FV2	foraging	visible	foragingvisible	130		1					1	1	a	b1	2952	397	1	0	1	0	1		1	1		10.44030651	0.745736179
FV2	foraging	visible	foragingvisible	140		1					1	1	a	b1	2943	378	1	0	1	0	1		1	1		21.02379604	1.501699717
FV2	foraging	visible	foragingvisible	150		1					1	1	a	b1	2943	375	1	0	1	0	1		1	1		3	0.214285714
FV2	foraging	visible	foragingvisible	160						17	1	1	a	b	2937.90625	390.868927	1	1	1	1	1	17	1	1	0	16.66640733	1.190457666
FV2	foraging	visible	foragingvisible	170						17	1	1	a	b	2935.941162	390.8156433	1	1	1	1	1	17	1	1	0	1.965810266	0.140415019
FV2	foraging	visible	foragingvisible	180						17	1	1	a	b	2954.242432	391.4658813	1	1	1	1	1	17	1	1	0	18.31281773	1.308058409
FV2	foraging	visible	foragingvisible	190						17	1	1	a	b	2954.255859	391.1997681	1	1	1	1	1	17	1	1	0	0.266451721	0.019032266
FV2	foraging	visible	foragingvisible	200						17	1	1	a	b	2936.209717	384.5178223	1	1	1	1	1	17	1	1	0	19.24348307	1.374534505
FV2	foraging	visible	foragingvisible	210						17	1	1	a	b	2933.377441	386.0699158	1	1	1	1	1	17	1	1	0	3.229672053	0.230690861
FV2	foraging	visible	foragingvisible	220						17	1	1	a	b1	2930.321045	391.8902283	1	1	1	1	1	17	1	1	0	6.574008983	0.46957207
FV2	foraging	visible	foragingvisible	230		1					1	1	a	b1	2958	393	1	0	1	0	1		1	1		27.70119389	1.978656707
FV2	foraging	visible	foragingvisible	240		1					1	1	a1	b1	2943	396	1	0	1	0	1		1	1		15.29705854	1.092647039
FV2	foraging	visible	foragingvisible	60						2	2	2	a	b1	2037.833618	1489.82666	1	1	1	1	2	2	2	1	1	0	0
FV2	foraging	visible	foragingvisible	70						2	2	2	a	b1	2035.460205	1481.008057	1	1	1	1	2	2	2	1	1	9.132406481	0.652314749
FV2	foraging	visible	foragingvisible	80						2	2	2	a	b	2035.975342	1481.155762	1	1	1	1	2	2	2	1	1	0.535894482	0.038278177
FV2	foraging	visible	foragingvisible	90						2	2	2	a	b	2036.410034	1481.035156	1	1	1	1	2	2	2	1	1	0.451113004	0.032222357
FV2	foraging	visible	foragingvisible	100						2	2	2	a	b1	2036.577026	1481.078369	1	1	1	1	2	2	2	1	1	0.172492584	0.012320899
FV2	foraging	visible	foragingvisible	110						2	2	2	a	b1	2035.820801	1481.095947	1	1	1	1	2	2	2	1	1	0.756429267	0.054030662
FV2	foraging	visible	foragingvisible	120						2	2	2	a	b1	2035.908447	1481.006226	1	1	1	1	2	2	2	1	1	0.125425991	0.008958999
FV2	foraging	visible	foragingvisible	130						2	2	2	a	b1	2035.443848	1480.825562	1	1	1	1	2	2	2	1	1	0.49848943	0.035606388
FV2	foraging	visible	foragingvisible	140						2	2	2	a	b1	2036.013306	1481.088989	1	1	1	1	2	2	2	1	1	0.62743621	0.044816872
FV2	foraging	visible	foragingvisible	150						2	2	2	a	b1	2035.894409	1480.983276	1	1	1	1	2	2	2	1	1	0.159096622	0.011364044
FV2	foraging	visible	foragingvisible	160						2	2	2	a	b	2035.499023	1480.722046	1	1	1	1	2	2	2	1	1	0.473889441	0.033849246
FV2	foraging	visible	foragingvisible	170						2	2	2	a	b	2034.681519	1480.787231	1	1	1	1	2	2	2	1	1	0.820098698	0.058578478
FV2	foraging	visible	foragingvisible	180						2	2	2	a	b1	2035.08313	1481.213135	1	1	1	1	2	2	2	1	1	0.585393554	0.041813825
FV2	foraging	visible	foragingvisible	190						2	2	2	a	b1	2035.631714	1480.824951	1	1	1	1	2	2	2	1	1	0.672035135	0.04800251
FV2	foraging	visible	foragingvisible	200						2	2	2	a	b	2035.210327	1481.210205	1	1	1	1	2	2	2	1	1	0.57095328	0.040782377
FV2	foraging	visible	foragingvisible	210						2	2	2	a	b	2034.807617	1480.844727	1	1	1	1	2	2	2	1	1	0.543828569	0.038844898
FV2	foraging	visible	foragingvisible	220						2	2	2	a	b1	2035.402588	1480.995605	1	1	1	1	2	2	2	1	1	0.613803439	0.043843103
FV2	foraging	visible	foragingvisible	230						2	2	2	a	b1	2035.47168	1480.591919	1	1	1	1	2	2	2	1	1	0.409555968	0.029253998
FV2	foraging	visible	foragingvisible	240						2	2	2	a	b1	2034.766846	1480.59436	1	1	1	1	2	2	2	1	1	0.704838227	0.050345588
FV2	foraging	visible	foragingvisible	60						-1	3	3	a1	b	1339.416504	417.6029358	1	1	1	0	3		3	1		0	0
FV2	foraging	visible	foragingvisible	70						-1	3	3	a	b1	1339.278076	419.2741089	1	1	1	0	3		3	1		1.676896491	0.119778321
FV2	foraging	visible	foragingvisible	80						-1	3	3	a	b1	1348.833862	426.673584	1	1	1	0	3		3	1		12.08574689	0.863267635
FV2	foraging	visible	foragingvisible	90						-1	3	3	a	b1	1348.648071	426.3664551	1	1	1	0	3		3	1		0.358951887	0.02563942
FV2	foraging	visible	foragingvisible	100						-1	3	3	a	b1	1347.780762	446.5205994	1	1	1	0	3		3	1		20.17279746	1.440914104
FV2	foraging	visible	foragingvisible	110						-1	20	3	a2	b2	1339.26355	449.1445313	1	1	0	0						8.912234224	0.636588159
FV2	foraging	visible	foragingvisible	120					c4	-1	20	3	a	b2	1335.769531	431.6944885	1	1	0	0						17.7964087	1.27117205
FV2	foraging	visible	foragingvisible	130					c4	-1	20	3	a	b2	1334.368408	433.1080322	1	1	0	0						1.990289289	0.142163521
FV2	foraging	visible	foragingvisible	140						-1	20	3	a	b2	1333.790527	431.3754578	1	1	0	0						1.826406445	0.130457603
FV2	foraging	visible	foragingvisible	150					c4	-1	20	3	a	b2	1350.097168	429.3315125	1	1	0	0						16.43424027	1.173874305
FV2	foraging	visible	foragingvisible	160					c4	-1	20	3	a	b2	1336.48877	432.4585876	1	1	0	0						13.9630618	0.997361557
FV2	foraging	visible	foragingvisible	170					c4	-1	20	3	a	b2	1336.450928	429.8554382	1	1	0	0						2.60342444	0.185958889
FV2	foraging	visible	foragingvisible	180					c4	-1	20	3	a	b2	1338.708496	431.3815918	1	1	0	0						2.725024419	0.194644601
FV2	foraging	visible	foragingvisible	190						-1	20	3	a2	b2	1361.02356	443.4937439	1	1	0	0						25.39027983	1.813591416
FV2	foraging	visible	foragingvisible	200						-1	3	3	a1	b1	1403.762085	412.7196045	1	1	1	0	3		3	1		52.66525586	3.76180399
FV2	foraging	visible	foragingvisible	210					c5	-1	20	3	a2	b1	1499.783081	422.001709	1	1	0	0						96.46859145	6.890613675
FV2	foraging	visible	foragingvisible	220						-1	3	3	a2	b1	1700.084351	397.3777466	1	1	1	0	3		3	1		201.809163	14.41494022
FV2	foraging	visible	foragingvisible	230						-1	3	3	a	b1	1748.726929	380.3968201	1	1	1	0	3		3	1		51.52137672	3.680098337
FV2	foraging	visible	foragingvisible	240						-1	3	3	a	b1	1783.023315	362.4691162	1	1	1	0	3		3	1		38.6994142	2.764243872
FV2	foraging	visible	foragingvisible	60						-1	20	4	a2	b1	1998.156982	322.6434631	1	1	0	0						0	0
FV2	foraging	visible	foragingvisible	70						4	4	4	a	b1	1978.628296	327.415863	1	1	1	1	4	4	4	1	1	20.10336732	1.435954809
FV2	foraging	visible	foragingvisible	80						4	4	4	a	b1	1945.250366	323.2104187	1	1	1	1	4	4	4	1	1	33.64181881	2.402987058
FV2	foraging	visible	foragingvisible	90						4	4	4	a	b1	1940.895752	323.0155334	1	1	1	1	4	4	4	1	1	4.358972742	0.311355196
FV2	foraging	visible	foragingvisible	100						4	4	4	a	b1	1933.705566	319.6899414	1	1	1	1	4	4	4	1	1	7.92201596	0.565858283
FV2	foraging	visible	foragingvisible	110						4	4	4	a	b1	1890.993652	324.380249	1	1	1	1	4	4	4	1	1	42.96866978	3.069190699
FV2	foraging	visible	foragingvisible	120						4	4	4	a	b1	1872.384399	325.1130371	1	1	1	1	4	4	4	1	1	18.62367514	1.33026251
FV2	foraging	visible	foragingvisible	130						4	4	4	a	b1	1872.029175	326.3191223	1	1	1	1	4	4	4	1	1	1.257308872	0.089807777
FV2	foraging	visible	foragingvisible	140					c4	4	4	4	a1	b1	1847.223755	345.066864	1	1	1	1	4	4	4	1	1	31.09319347	2.220942391
FV2	foraging	visible	foragingvisible	150						4	4	4	a1	b1	1849.229736	365.4848633	1	1	1	1	4	4	4	1	1	20.51630218	1.465450156
FV2	foraging	visible	foragingvisible	160						4	20	4	a2	b	1902.394409	416.7663269	1	1	0	1		4	4	0	1	73.86657542	5.276183959
FV2	foraging	visible	foragingvisible	170						4	4	4	a	b1	2025.622437	377.81427	1	1	1	1	4	4	4	1	1	129.2378026	9.231271614
FV2	foraging	visible	foragingvisible	180						4	4	4	a	b1	2020.790649	346.1912842	1	1	1	1	4	4	4	1	1	31.98998916	2.284999225
FV2	foraging	visible	foragingvisible	190						4	4	4	a1	b1	2056.384277	326.1420288	1	1	1	1	4	4	4	1	1	40.85191545	2.917993961
FV2	foraging	visible	foragingvisible	200					c1	4	20	4	a	b2	2088.614746	315.5557861	1	1	0	1		4	4	0	1	33.9244995	2.423178536
FV2	foraging	visible	foragingvisible	210				1	c1		20	4	a2	b	2136	303	1	0	0	0						49.02050654	3.501464753
FV2	foraging	visible	foragingvisible	220					c1	-1	20	4	a	b1	2137.547852	321.3391724	1	1	0	0						18.40437693	1.314598352
FV2	foraging	visible	foragingvisible	230		3					20	4	a	b2	2100	306	1	0	0	0						40.56021942	2.89715853
FV2	foraging	visible	foragingvisible	240		3			c1	-1	20	4	a	b2	2064.490234	315.9081421	1	1	0	0						36.86617367	2.633298119
FV2	foraging	visible	foragingvisible	60						-1	20	5	a2	b1	3045.029053	989.0863647	1	1	0	0						0	0
FV2	foraging	visible	foragingvisible	70						-1	20	5	a1	b1	3042.422363	989.1431885	1	1	0	0						2.607309284	0.186236377
FV2	foraging	visible	foragingvisible	80						-1	20	5	a1	b1	3043.392578	988.6744385	1	1	0	0						1.077517382	0.076965527
FV2	foraging	visible	foragingvisible	90						-1	5	5	a1	b1	3043.760498	991.270874	1	1	1	0	5		5	1		2.622373435	0.187312388
FV2	foraging	visible	foragingvisible	100						-1	5	5	a	b1	3043.015381	989.0970459	1	1	1	0	5		5	1		2.297983453	0.164141675
FV2	foraging	visible	foragingvisible	110						-1	5	5	a1	b1	3039.673584	991.5944824	1	1	1	0	5		5	1		4.171905591	0.297993257
FV2	foraging	visible	foragingvisible	120						-1	5	5	a	b1	3043.827881	989.4186401	1	1	1	0	5		5	1		4.68961334	0.334972381
FV2	foraging	visible	foragingvisible	130						-1	5	5	a1	b1	3043.010986	990.0354004	1	1	1	0	5		5	1		1.023577407	0.073112672
FV2	foraging	visible	foragingvisible	140						-1	5	5	a1	b2	3043.417969	991.265625	1	1	1	0	5		5	1		1.295796176	0.09255687
FV2	foraging	visible	foragingvisible	150						-1	5	5	a1	b1	3043.190918	990.4395142	1	1	1	0	5		5	1		0.856744542	0.061196039
FV2	foraging	visible	foragingvisible	160						-1	5	5	a1	b1	3044.139648	991.9105225	1	1	1	0	5		5	1		1.750415388	0.125029671
FV2	foraging	visible	foragingvisible	170						-1	5	5	a1	b1	3042.575195	990.7433472	1	1	1	0	5		5	1		1.95187381	0.139419558
FV2	foraging	visible	foragingvisible	180						-1	5	5	a1	b1	3040.98877	992.0352173	1	1	1	0	5		5	1		2.045891648	0.146135118
FV2	foraging	visible	foragingvisible	190						-1	5	5	a1	b1	3037.305664	993.7321777	1	1	1	0	5		5	1		4.055236665	0.289659762
FV2	foraging	visible	foragingvisible	200						-1	5	5	a1	b1	3039.054688	992.5249634	1	1	1	0	5		5	1		2.125194419	0.151799601
FV2	foraging	visible	foragingvisible	210						-1	5	5	a1	b1	3040.956299	992.7501221	1	1	1	0	5		5	1		1.914894471	0.136778177
FV2	foraging	visible	foragingvisible	220						-1	5	5	a1	b1	3039.69751	991.012207	1	1	1	0	5		5	1		2.145902757	0.153278768
FV2	foraging	visible	foragingvisible	230						-1	5	5	a1	b1	3039.644775	992.4805908	1	1	1	0	5		5	1		1.469330448	0.104952175
FV2	foraging	visible	foragingvisible	240						5	5	5	a	b1	3046.245117	991.1004028	1	1	1	1	5	5	5	1	1	6.743102656	0.48165019
FV2	foraging	visible	foragingvisible	60						-1	6	6	a1	b	2992.524658	659.635498	1	1	1	0	6		6	1		0	0
FV2	foraging	visible	foragingvisible	70						-1	6	6	a	b1	3027.239502	619.3284912	1	1	1	0	6		6	1		53.19563132	3.799687951
FV2	foraging	visible	foragingvisible	80						-1	6	6	a	b1	3096.635254	622.2167358	1	1	1	0	6		6	1		69.45583023	4.96113073
FV2	foraging	visible	foragingvisible	90						6	6	6	a	b1	3119.742188	627.4287109	1	1	1	1	6	6	6	1	1	23.68744569	1.691960406
FV2	foraging	visible	foragingvisible	100						6	20	6	a1	b	3147.012695	759.3170166	1	1	0	1		6	6	0	1	134.6781561	9.619868293
FV2	foraging	visible	foragingvisible	110						-1	20	6	a1	b1	3152.021729	993.1746216	1	1	0	0						233.9112435	16.70794596
FV2	foraging	visible	foragingvisible	120						-1	20	6	a2	b	3110.415527	1289.882446	1	1	0	0						299.6107627	21.40076876
FV2	foraging	visible	foragingvisible	130						-1	20	6	a2	b1	3040.581543	1602.249023	1	1	0	0						320.0775902	22.86268501
FV2	foraging	visible	foragingvisible	140							20	6	a1	b	3093	1815	1	0	0	0						219.113379	15.65095564
FV2	foraging	visible	foragingvisible	150						-1	20	6	a2	b	3034.29126	1871.09021	1	1	0	0						81.19623027	5.799730734
FV2	foraging	visible	foragingvisible	160						-1	6	6	a	b1	3020.999512	1930.060059	1	1	1	0	6		6	1		60.44926514	4.317804653
FV2	foraging	visible	foragingvisible	170					c5	-1	20	6	a2	b	2989.983398	1918.029053	1	1	0	0						33.26776868	2.376269192
FV2	foraging	visible	foragingvisible	180					c5	-1	20	6	a2	b1	2908.941895	1914.220093	1	1	0	0						81.1309644	5.795068886
FV2	foraging	visible	foragingvisible	190						-1	6	6	a	b1	2667.518799	1917.996704	1	1	1	0	6		6	1		241.4526332	17.24661666
FV2	foraging	visible	foragingvisible	200						-1	6	6	a	b1	2669.054443	1930.686279	1	1	1	0	6		6	1		12.78215616	0.913011155
FV2	foraging	visible	foragingvisible	210						-1	6	6	a	b1	2668.626465	1931.207764	1	1	1	0	6		6	1		0.674619725	0.048187123
FV2	foraging	visible	foragingvisible	220						-1	6	6	a	b1	2670.144287	1918.422974	1	1	1	0	6		6	1		12.87457335	0.919612382
FV2	foraging	visible	foragingvisible	230		4					6	6	a	b1	2646	1926	1	0	1	0	6		6	1		25.30529426	1.807521019
FV2	foraging	visible	foragingvisible	240						9	20	6	a2	b1	2637.223389	1908.203857	1	1	0	1		9	6	0	0	19.84267135	1.417333668
FV2	foraging	visible	foragingvisible	60						-1	7	7	a	b	927.9668579	1911.802612	1	1	1	0	7		7	1		0	0
FV2	foraging	visible	foragingvisible	70		2				7	7	7	a	b1	924.0991821	1909.836548	1	1	1	1	7	7	7	1	1	4.338700698	0.309907193
FV2	foraging	visible	foragingvisible	80						7	7	7	a	b1	925.1422119	1911.115234	1	1	1	1	7	7	7	1	1	1.65013607	0.117866862
FV2	foraging	visible	foragingvisible	90						7	7	7	a	b1	937.053894	1912.27124	1	1	1	1	7	7	7	1	1	11.96764473	0.854831766
FV2	foraging	visible	foragingvisible	100						7	7	7	a	b1	940.4954224	1908.072021	1	1	1	1	7	7	7	1	1	5.429323893	0.38780885
FV2	foraging	visible	foragingvisible	110						7	7	7	a	b1	926.0634155	1906.624756	1	1	1	1	7	7	7	1	1	14.50439241	1.036028029
FV2	foraging	visible	foragingvisible	120						7	7	7	a	b1	927.1003418	1902.896729	1	1	1	1	7	7	7	1	1	3.869547966	0.276396283
FV2	foraging	visible	foragingvisible	130						7	7	7	a	b1	935.3908691	1905.819214	1	1	1	1	7	7	7	1	1	8.790549555	0.627896397
FV2	foraging	visible	foragingvisible	140						7	7	7	a	b1	943.4710693	1907.270142	1	1	1	1	7	7	7	1	1	8.209435263	0.586388233
FV2	foraging	visible	foragingvisible	150						7	7	7	a	b1	930.7177124	1901.210327	1	1	1	1	7	7	7	1	1	14.11982543	1.008558959
FV2	foraging	visible	foragingvisible	160			1			7	7	7	a	b1	924.8616333	1903.06897	1	1	1	1	7	7	7	1	1	6.143957701	0.438854121
FV2	foraging	visible	foragingvisible	170		2				7	7	7	a	b1	921.1091919	1916.136963	1	1	1	1	7	7	7	1	1	13.59607508	0.97114822
FV2	foraging	visible	foragingvisible	180						-1	7	7	a	b1	948.0401001	1902.660645	1	1	1	0	7		7	1		30.11453077	2.151037912
FV2	foraging	visible	foragingvisible	190						7	7	7	a	b1	950.43396	1896.897827	1	1	1	1	7	7	7	1	1	6.240243306	0.445731665
FV2	foraging	visible	foragingvisible	200						7	7	7	a	b1	949.7752075	1896.804077	1	1	1	1	7	7	7	1	1	0.66539005	0.047527861
FV2	foraging	visible	foragingvisible	210						7	7	7	a	b1	949.5899048	1896.834717	1	1	1	1	7	7	7	1	1	0.187818796	0.013415628
FV2	foraging	visible	foragingvisible	220						7	7	7	a	b1	950.8219604	1896.368774	1	1	1	1	7	7	7	1	1	1.317218236	0.094087017
FV2	foraging	visible	foragingvisible	230						7	7	7	a	b1	949.9633789	1895.885864	1	1	1	1	7	7	7	1	1	0.985070688	0.070362192
FV2	foraging	visible	foragingvisible	240						7	7	7	a	b1	950.644104	1895.690552	1	1	1	1	7	7	7	1	1	0.708190256	0.050585018
FV2	foraging	visible	foragingvisible	60						-1	8	8	a1	b	2745.384277	381.8779907	1	1	1	0	8		8	1		0	0
FV2	foraging	visible	foragingvisible	70						-1	8	8	a1	b1	2712.427002	387.3938293	1	1	1	0	8		8	1		33.41566176	2.386832983
FV2	foraging	visible	foragingvisible	80					c5	-1	20	8	a2	b	2470.875732	376.7670898	1	1	0	0						241.7849119	17.27035085
FV2	foraging	visible	foragingvisible	90					c5	-1	20	8	a2	b	2269.682129	425.2896423	1	1	0	0						206.9620835	14.78300596
FV2	foraging	visible	foragingvisible	100						-1	8	8	a	b	2035.971436	396.1637268	1	1	1	0	8		8	1		235.5185916	16.82275654
FV2	foraging	visible	foragingvisible	110						-1	8	8	a	b	2002.154053	345.5501709	1	1	1	0	8		8	1		60.87156507	4.347968933
FV2	foraging	visible	foragingvisible	120						-1	8	8	a	b	1997.891479	329.4796143	1	1	1	0	8		8	1		16.62625413	1.187589581
FV2	foraging	visible	foragingvisible	130						-1	8	8	a	b	2013.808472	345.2449341	1	1	1	0	8		8	1		22.40303494	1.600216781
FV2	foraging	visible	foragingvisible	140						4	8	8	a	b	1960.44458	328.3589478	1	1	1	1	8	4	8	1	0	55.97179203	3.997985145
FV2	foraging	visible	foragingvisible	150				1	c1		20	8	a	b2	1878	300	1	0	1	0	8		8	1		87.18565646	6.22754689
FV2	foraging	visible	foragingvisible	160				1			8	8	a	b	1872	303	1	0	1	0	8		8	1		6.708203932	0.479157424
FV2	foraging	visible	foragingvisible	170						-1	8	8	a	b	1868.165771	319.7684631	1	1	1	0	8		8	1		17.20124027	1.228660019
FV2	foraging	visible	foragingvisible	180						-1	8	8	a	b	1778.938232	360.737793	1	1	1	0	8		8	1		98.18370388	7.013121706
FV2	foraging	visible	foragingvisible	190						-1	8	8	a	b	1830.238037	354.2941284	1	1	1	0	8		8	1		51.70290907	3.693064934
FV2	foraging	visible	foragingvisible	200						-1	8	8	a	b1	1849.330322	350.1399841	1	1	1	0	8		8	1		19.53899336	1.395642383
FV2	foraging	visible	foragingvisible	210					c4	-1	20	8	a	b2	1888.523682	323.3254089	1	1	0	0						47.48832395	3.392023139
FV2	foraging	visible	foragingvisible	220					c1	-1	20	8	a	b2	1965.692749	317.0673828	1	1	0	0						77.42239852	5.530171323
FV2	foraging	visible	foragingvisible	230		3			c4	-1	20	8	a	b2	2022.818359	315.1691284	1	1	0	0						57.1571403	4.082652879
FV2	foraging	visible	foragingvisible	240		3			c1		20	8	a1	b2	2014	297	1	0	0	0						20.19605611	1.442575436
FV2	foraging	visible	foragingvisible	60						-1	9	9	a	b	1489.427734	1971.398193	1	1	1	0	9		9	1		0	0
FV2	foraging	visible	foragingvisible	70					c4	-1	20	9	a	b2	1550.561035	1979.503296	1	1	0	0						61.66825104	4.404875074
FV2	foraging	visible	foragingvisible	80				1	c1		20	9	a	b2	1665	1992	1	0	0	0						115.1192613	8.222804378
FV2	foraging	visible	foragingvisible	90					c5	-1	20	9	a2	b1	1783.311035	1964.654175	1	1	0	0						121.4302069	8.673586207
FV2	foraging	visible	foragingvisible	100						-1	9	9	a	b1	1952.283081	1943.401611	1	1	1	0	9		9	1		170.3033288	12.16452349
FV2	foraging	visible	foragingvisible	110						-1	9	9	a	b1	2000.933716	1970.210571	1	1	1	0	9		9	1		55.54821889	3.967729921
FV2	foraging	visible	foragingvisible	120						9	9	9	a	b1	2005.528442	1976.315552	1	1	1	1	9	9	9	1	1	7.640831108	0.545773651
FV2	foraging	visible	foragingvisible	130						9	9	9	a	b1	2015.015137	1979.863281	1	1	1	1	9	9	9	1	1	10.12836428	0.723454592
FV2	foraging	visible	foragingvisible	140						9	9	9	a	b1	2017.401489	1970.97522	1	1	1	1	9	9	9	1	1	9.202842181	0.65734587
FV2	foraging	visible	foragingvisible	150						9	9	9	a	b1	2015.387451	1977.296021	1	1	1	1	9	9	9	1	1	6.633918476	0.47385132
FV2	foraging	visible	foragingvisible	160					c1	9	20	9	a	b2	2056.007568	1978.624512	1	1	0	1		9	9	0	1	40.64183551	2.902988251
FV2	foraging	visible	foragingvisible	170					c1	-1	20	9	a	b2	2151.106445	1978.799805	1	1	0	0						95.09903856	6.792788468
FV2	foraging	visible	foragingvisible	180						-1	20	9	a2	b	2248.42627	1948.399414	1	1	0	0						101.9575015	7.282678678
FV2	foraging	visible	foragingvisible	190						-1	9	9	a	b1	2531.368408	1934.294067	1	1	1	0	9		9	1		283.2935126	20.2352509
FV2	foraging	visible	foragingvisible	200						-1	9	9	a	b	2540.508789	1931.728882	1	1	1	0	9		9	1		9.493510358	0.678107883
FV2	foraging	visible	foragingvisible	210						-1	9	9	a	b	2533.272949	1931.218628	1	1	1	0	9		9	1		7.253808631	0.518129188
FV2	foraging	visible	foragingvisible	220						9	9	9	a	b1	2539.72876	1918.454102	1	1	1	1	9	9	9	1	1	14.30421685	1.021729775
FV2	foraging	visible	foragingvisible	230		4				9	9	9	a	b	2592.13916	1929.557373	1	1	1	1	9	9	9	1	1	53.57361902	3.826687073
FV2	foraging	visible	foragingvisible	240						-1	9	9	a	b	2533.891846	1929.504272	1	1	1	0	9		9	1		58.2473382	4.160524157
FV2	foraging	visible	foragingvisible	60							10	10	a1	b	3093	648	1	0	1	0	10		10	1		0	0
FV2	foraging	visible	foragingvisible	70						-1	10	10	a	b	3094.734619	695.3972168	1	1	1	0	10		10	1		47.42894753	3.387781966
FV2	foraging	visible	foragingvisible	80						-1	20	10	a2	b	3083.584229	829.9634399	1	1	0	0						135.0274031	9.644814509
FV2	foraging	visible	foragingvisible	90						-1	20	10	a2	b	3105.94165	1029.679077	1	1	0	0						200.9631558	14.35451113
FV2	foraging	visible	foragingvisible	100						-1	20	10	a2	b	3105.528564	1263.617554	1	1	0	0						233.9388417	16.70991727
FV2	foraging	visible	foragingvisible	110						-1	10	10	a1	b	3064.843018	1565.539063	1	1	1	0	10		10	1		304.6504739	21.76074814
FV2	foraging	visible	foragingvisible	120					c5	-1	20	10	a2	b	3142.09082	1798.276855	1	1	0	0						245.2225576	17.51589697
FV2	foraging	visible	foragingvisible	130						-1	10	10	a	b	3152.062988	1914.046021	1	1	1	0	10		10	1		116.1978654	8.299847531
FV2	foraging	visible	foragingvisible	140							10	10	a	b	3156	1887	1	0	1	0	10		10	1		27.33106868	1.952219192
FV2	foraging	visible	foragingvisible	150						10	10	10	a1	b1	3151.058594	1796.332275	1	1	1	1	10	10	10	1	1	90.80227888	6.485877063
FV2	foraging	visible	foragingvisible	160						10	10	10	a1	b1	3131.560303	1567.109985	1	1	1	1	10	10	10	1	1	230.0500849	16.43214892
FV2	foraging	visible	foragingvisible	170						10	20	10	a2	b1	3140.886963	1269.478027	1	1	0	1		10	10	0	1	297.7780533	21.26986095
FV2	foraging	visible	foragingvisible	180						10	10	10	a	b1	3126.163086	1029.462158	1	1	1	1	10	10	10	1	1	240.4670662	17.17621901
FV2	foraging	visible	foragingvisible	190						10	10	10	a	b1	3126.054688	994.2871704	1	1	1	1	10	10	10	1	1	35.17515462	2.512511045
FV2	foraging	visible	foragingvisible	200						10	10	10	a	b1	3116.496582	989.6027222	1	1	1	1	10	10	10	1	1	10.64431516	0.760308226
FV2	foraging	visible	foragingvisible	210						10	10	10	a	b1	3112.929688	988.940918	1	1	1	1	10	10	10	1	1	3.627770335	0.259126453
FV2	foraging	visible	foragingvisible	220						10	10	10	a1	b2	3109.085449	987.4319458	1	1	1	1	10	10	10	1	1	4.129790623	0.294985044
FV2	foraging	visible	foragingvisible	230						10	10	10	a	b2	3112.678223	987.6307373	1	1	1	1	10	10	10	1	1	3.598269456	0.257019247
FV2	foraging	visible	foragingvisible	240						10	10	10	a1	b1	3142.038818	923.2965698	1	1	1	1	10	10	10	1	1	70.71725141	5.051232243
FV2	foraging	visible	foragingvisible	60						-1	20	11	a2	b1	3102.613525	363.4126892	1	1	0	0						0	0
FV2	foraging	visible	foragingvisible	70						-1	20	11	a1	b1	3084.279785	357.5787354	1	1	0	0						19.23956962	1.374254973
FV2	foraging	visible	foragingvisible	80						11	11	11	a1	b1	3080.957764	356.4188538	1	1	1	1	11	11	11	1	1	3.518685671	0.251334691
FV2	foraging	visible	foragingvisible	90						11	11	11	a1	b1	3079.974365	359.3986511	1	1	1	1	11	11	11	1	1	3.13787596	0.224133997
FV2	foraging	visible	foragingvisible	100						11	11	11	a1	b1	3080.700928	362.5765381	1	1	1	1	11	11	11	1	1	3.259886436	0.232849031
FV2	foraging	visible	foragingvisible	110						11	11	11	a1	b1	3083.498047	358.5951843	1	1	1	1	11	11	11	1	1	4.865701674	0.34755012
FV2	foraging	visible	foragingvisible	120						11	11	11	a	b1	3094.384766	355.219574	1	1	1	1	11	11	11	1	1	11.39804349	0.814145964
FV2	foraging	visible	foragingvisible	130						11	11	11	a	b1	3090.766846	353.8629456	1	1	1	1	11	11	11	1	1	3.863908092	0.275993435
FV2	foraging	visible	foragingvisible	140						11	11	11	a	b1	3059.476807	345.3386841	1	1	1	1	11	11	11	1	1	32.43038043	2.316455745
FV2	foraging	visible	foragingvisible	150						11	11	11	a1	b1	3047.437012	344.1141663	1	1	1	1	11	11	11	1	1	12.10190512	0.864421794
FV2	foraging	visible	foragingvisible	160						11	11	11	a	b1	3035.445313	332.8551636	1	1	1	1	11	11	11	1	1	16.44889014	1.174920724
FV2	foraging	visible	foragingvisible	170						11	11	11	a1	b1	3028.720703	324.1395874	1	1	1	1	11	11	11	1	1	11.00825364	0.786303831
FV2	foraging	visible	foragingvisible	180						11	11	11	a	b1	3022.264648	320.6281433	1	1	1	1	11	11	11	1	1	7.349209878	0.524943563
FV2	foraging	visible	foragingvisible	190				1			11	11	a1	b1	2982	315	1	0	1	0	11		11	1		40.65609272	2.904006623
FV2	foraging	visible	foragingvisible	200				1			11	11	a	b	2970	318	1	0	1	0	11		11	1		12.36931688	0.883522634
FV2	foraging	visible	foragingvisible	210				1			11	11	a1	b1	2952	324	1	0	1	0	11		11	1		18.97366596	1.355261854
FV2	foraging	visible	foragingvisible	220				1			11	11	a	b1	2937	324	1	0	1	0	11		11	1		15	1.071428571
FV2	foraging	visible	foragingvisible	230						17	11	11	a1	b	2914.221924	329.0931702	1	1	1	1	11	17	11	1	0	23.34054689	1.66718192
FV2	foraging	visible	foragingvisible	240						17	11	11	a	b1	2891.934814	350.9320679	1	1	1	1	11	17	11	1	0	31.20340887	2.228814919
FV2	foraging	visible	foragingvisible	60		1				-1	20	14	a2	b1	3021.481689	419.4950256	1	1	0	0						0	0
FV2	foraging	visible	foragingvisible	70						-1	20	14	a1	b1	3033.986328	449.6453552	1	1	0	0						32.64059392	2.331470994
FV2	foraging	visible	foragingvisible	80						-1	20	14	a1	b1	3028.144287	446.2439575	1	1	0	0						6.760099804	0.482864272
FV2	foraging	visible	foragingvisible	90						-1	14	14	a1	b1	3029.066162	450.1574097	1	1	1	0	14		14	1		4.020567328	0.287183381
FV2	foraging	visible	foragingvisible	100						-1	14	14	a1	b1	3029.869629	452.617981	1	1	1	0	14		14	1		2.588430092	0.184887864
FV2	foraging	visible	foragingvisible	110						-1	14	14	a1	b1	3038.169922	450.0204773	1	1	1	0	14		14	1		8.697234581	0.621231042
FV2	foraging	visible	foragingvisible	120						17	20	14	a2	b2	3039.426025	453.40448	1	1	0	1		17	14	0	0	3.609607876	0.257829134
FV2	foraging	visible	foragingvisible	130						17	14	14	a1	b1	3037.383057	447.3850708	1	1	1	1	14	17	14	1	0	6.356650483	0.454046463
FV2	foraging	visible	foragingvisible	140						17	20	14	a2	b2	3040.943115	448.2616577	1	1	0	1		17	14	0	0	3.666390262	0.261885019
FV2	foraging	visible	foragingvisible	150						17	14	14	a1	b1	3037.226074	432.2652588	1	1	1	1	14	17	14	1	0	16.42258115	1.173041511
FV2	foraging	visible	foragingvisible	160		1					14	14	a1	b1	3045	426	1	0	1	0	14		14	1		9.98435743	0.713168388
FV2	foraging	visible	foragingvisible	170		1					14	14	a	b1	3039	426	1	0	1	0	14		14	1		6	0.428571429
FV2	foraging	visible	foragingvisible	180		1					14	14	a1	b1	3048	426	1	0	1	0	14		14	1		9	0.642857143
FV2	foraging	visible	foragingvisible	190		1					14	14	a	b1	3045	420	1	0	1	0	14		14	1		6.708203932	0.479157424
FV2	foraging	visible	foragingvisible	200						17	14	14	a1	b1	3042.111328	444.3830566	1	1	1	1	14	17	14	1	0	24.55357153	1.753826538
FV2	foraging	visible	foragingvisible	210		1					14	14	a1	b2	3045	429	1	0	1	0	14		14	1		15.6519282	1.117994871
FV2	foraging	visible	foragingvisible	220		1					14	14	a1	b1	3045	423	1	0	1	0	14		14	1		6	0.428571429
FV2	foraging	visible	foragingvisible	230						-1	14	14	a1	b1	3032.021973	428.9709778	1	1	1	0	14		14	1		14.28571877	1.020408483
FV2	foraging	visible	foragingvisible	240						17	14	14	a1	b1	3039.619873	448.7919922	1	1	1	1	14	17	14	1	0	21.22735726	1.516239804
FV2	foraging	visible	foragingvisible	60						-1	15	15	a	b	879.1445313	1914.734741	1	1	1	0	15		15	1		0	0
FV2	foraging	visible	foragingvisible	70		2					15	15	a	b1	882	1941	1	0	1	0	15		15	1		26.42002142	1.887144387
FV2	foraging	visible	foragingvisible	80						-1	15	15	a	b1	887.7120972	1933.296143	1	1	1	0	15		15	1		9.590488366	0.685034883
FV2	foraging	visible	foragingvisible	90						7	15	15	a	b1	868.130188	1917.570679	1	1	1	1	15	7	15	1	0	25.11456521	1.793897515
FV2	foraging	visible	foragingvisible	100						7	15	15	a	b1	874.7350464	1915.436035	1	1	1	1	15	7	15	1	0	6.941243368	0.495803098
FV2	foraging	visible	foragingvisible	110						7	15	15	a	b1	879.076416	1915.038818	1	1	1	1	15	7	15	1	0	4.359503567	0.311393112
FV2	foraging	visible	foragingvisible	120						15	15	15	a	b1	879.6064453	1915.182861	1	1	1	1	15	15	15	1	1	0.549253534	0.039232395
FV2	foraging	visible	foragingvisible	130						15	15	15	a	b1	877.1240845	1914.455322	1	1	1	1	15	15	15	1	1	2.586779492	0.184769964
FV2	foraging	visible	foragingvisible	140						15	15	15	a	b1	875.0093994	1918.476318	1	1	1	1	15	15	15	1	1	4.543159903	0.324511422
FV2	foraging	visible	foragingvisible	150						15	15	15	a	b1	876.2109375	1914.717896	1	1	1	1	15	15	15	1	1	3.94581167	0.281843691
FV2	foraging	visible	foragingvisible	160			1			15	15	15	a	b1	878.9802856	1929.014893	1	1	1	1	15	15	15	1	1	14.56274054	1.040195753
FV2	foraging	visible	foragingvisible	170		2					15	15	a	b1	885	1935	1	0	1	0	15		15	1		8.488725891	0.606337564
FV2	foraging	visible	foragingvisible	180						7	15	15	a	b1	911.3878784	1962.22644	1	1	1	1	15	7	15	1	0	37.9156849	2.708263207
FV2	foraging	visible	foragingvisible	190						7	15	15	a1	b1	939.4827271	1973.138184	1	1	1	1	15	7	15	1	0	30.13945389	2.152818135
FV2	foraging	visible	foragingvisible	200						7	15	15	a	b1	1007.271545	1967.284302	1	1	1	1	15	7	15	1	0	68.04110351	4.860078822
FV2	foraging	visible	foragingvisible	210						7	15	15	a	b1	1018.226379	1967.667603	1	1	1	1	15	7	15	1	0	10.96153765	0.782966975
FV2	foraging	visible	foragingvisible	220						7	15	15	a1	b1	1017.971619	1967.528564	1	1	1	1	15	7	15	1	0	0.290231806	0.020730843
FV2	foraging	visible	foragingvisible	230						7	15	15	a1	b1	1017.687988	1964.654663	1	1	1	1	15	7	15	1	0	2.887863138	0.206275938
FV2	foraging	visible	foragingvisible	240						7	15	15	a	b1	1014.528564	1965.505127	1	1	1	1	15	7	15	1	0	3.271887686	0.233706263
FV2	foraging	visible	foragingvisible	60						-1	20	16	a1	b1	2981.651855	737.5073853	1	1	0	0						0	0
FV2	foraging	visible	foragingvisible	70						-1	16	16	a	b1	2979.999023	737.0079346	1	1	1	0	16		16	1		1.726645482	0.12333182
FV2	foraging	visible	foragingvisible	80						-1	16	16	a	b1	2982.399658	736.3859863	1	1	1	0	16		16	1		2.479892758	0.177135197
FV2	foraging	visible	foragingvisible	90						-1	16	16	a	b1	2987.276611	733.0450439	1	1	1	0	16		16	1		5.911562119	0.422254437
FV2	foraging	visible	foragingvisible	100						-1	16	16	a	b1	2994.725098	734.0756836	1	1	1	0	16		16	1		7.519453223	0.537103802
FV2	foraging	visible	foragingvisible	110						16	16	16	a	b1	3038.522705	722.4147339	1	1	1	1	16	16	16	1	1	45.32337285	3.237383775
FV2	foraging	visible	foragingvisible	120						16	16	16	a	b1	3080.43335	687.6012573	1	1	1	1	16	16	16	1	1	54.48376196	3.891697283
FV2	foraging	visible	foragingvisible	130		3				16	16	16	a	b1	3109.356934	627.3557129	1	1	1	1	16	16	16	1	1	66.82888097	4.773491498
FV2	foraging	visible	foragingvisible	140						16	16	16	a	b1	3089.085205	656.0977783	1	1	1	1	16	16	16	1	1	35.17171193	2.512265138
FV2	foraging	visible	foragingvisible	150							16	16	a	b1	3099	657	1	0	1	0	16		16	1		9.955760337	0.711125738
FV2	foraging	visible	foragingvisible	160						16	16	16	a	b1	3104.753418	656.795166	1	1	1	1	16	16	16	1	1	5.75706311	0.411218794
FV2	foraging	visible	foragingvisible	170						16	16	16	a	b	3111.397461	669.6110229	1	1	1	1	16	16	16	1	1	14.43570211	1.031121579
FV2	foraging	visible	foragingvisible	180						16	20	16	a2	b1	3120.406494	684.7766113	1	1	0	1		16	16	0	1	17.63966403	1.259976002
FV2	foraging	visible	foragingvisible	190					c4	16	20	16	a	b2	3109.687744	698.2953491	1	1	0	1		16	16	0	1	17.25247441	1.232319601
FV2	foraging	visible	foragingvisible	200					c4	16	20	16	a	b2	3115.70752	721.4813843	1	1	0	1		16	16	0	1	23.95474758	1.711053398
FV2	foraging	visible	foragingvisible	210					c4	16	20	16	a	b2	3100.084473	747.8789673	1	1	0	1		16	16	0	1	30.67428868	2.19102062
FV2	foraging	visible	foragingvisible	220						16	20	16	a2	b2	3059.88501	790.4967041	1	1	0	1		16	16	0	1	58.58556405	4.184683147
FV2	foraging	visible	foragingvisible	230					c4	16	20	16	a	b2	3036.724121	835.2302856	1	1	0	1		16	16	0	1	50.37380364	3.598128831
FV2	foraging	visible	foragingvisible	240					c4	16	20	16	a	b2	3012.079346	891.6212769	1	1	0	1		16	16	0	1	61.54111499	4.395793928
FV2	foraging	visible	foragingvisible	60		1					17	17	a1	b1	3003	378	1	0	1	0	17		17	1		0	0
FV2	foraging	visible	foragingvisible	70		1					17	17	a	b1	3000	387	1	0	1	0	17		17	1		9.486832981	0.677630927
FV2	foraging	visible	foragingvisible	80		1					17	17	a1	b1	2997	372	1	0	1	0	17		17	1		15.29705854	1.092647039
FV2	foraging	visible	foragingvisible	90		1					17	17	a	b1	2994	384	1	0	1	0	17		17	1		12.36931688	0.883522634
FV2	foraging	visible	foragingvisible	100		1					17	17	a	b1	3003	396	1	0	1	0	17		17	1		15	1.071428571
FV2	foraging	visible	foragingvisible	110		1					17	17	a	b1	2994	387	1	0	1	0	17		17	1		12.72792206	0.90913729
FV2	foraging	visible	foragingvisible	120		1				17	17	17	a	b1	2961.03833	391.6654663	1	1	1	1	17	17	17	1	1	33.29021275	2.377872339
FV2	foraging	visible	foragingvisible	130		1				17	17	17	a	b1	2956.533447	390.4307861	1	1	1	1	17	17	17	1	1	4.671017666	0.333644119
FV2	foraging	visible	foragingvisible	140		1				17	17	17	a	b1	2954.895508	389.3096924	1	1	1	1	17	17	17	1	1	1.984866558	0.141776183
FV2	foraging	visible	foragingvisible	150		1				17	17	17	a	b1	2952.707275	391.5376282	1	1	1	1	17	17	17	1	1	3.122829101	0.223059221
FV2	foraging	visible	foragingvisible	160		1				17	17	17	a	b1	3032.415527	430.5232544	1	1	1	1	17	17	17	1	1	88.7315304	6.337966457
FV2	foraging	visible	foragingvisible	170		1				17	17	17	a	b1	3032.131348	427.8600159	1	1	1	1	17	17	17	1	1	2.678357148	0.191311225
FV2	foraging	visible	foragingvisible	180		1				17	3	17	a	b1	3034.819824	431.1412354	1	1	1	1	17	17	17	1	1	4.241969426	0.302997816
FV2	foraging	visible	foragingvisible	190		1				17	17	17	a	b1	3039.322754	432.4240112	1	1	1	1	17	17	17	1	1	4.682082052	0.334434432
FV2	foraging	visible	foragingvisible	200							17	17	a	b	2994	384	1	0	1	0	17		17	1		66.3252357	4.737516836
FV2	foraging	visible	foragingvisible	210		1				17	17	17	a	b1	3038.029541	427.8172302	1	1	1	1	17	17	17	1	1	62.11722904	4.436944931
FV2	foraging	visible	foragingvisible	220		1				17	17	17	a	b1	3026.352051	426.8437805	1	1	1	1	17	17	17	1	1	11.71799373	0.836999552
FV2	foraging	visible	foragingvisible	230		1				17	17	17	a	b1	2977.928223	417.2357483	1	1	1	1	17	17	17	1	1	49.36781746	3.526272676
FV2	foraging	visible	foragingvisible	240		1				-1	17	17	a1	b1	2976.89209	413.1508484	1	1	1	0	17		17	1		4.214258984	0.301018499
FV2	foraging	visible	foragingvisible	60							20	18	a2	b1	3150	555	1	0	0	0						0	0
FV2	foraging	visible	foragingvisible	70							18	18	a1	b1	3147	561	1	0	1	0	18		18	1		6.708203932	0.479157424
FV2	foraging	visible	foragingvisible	80							18	18	a1	b1	3153	522	1	0	1	0	18		18	1		39.45883931	2.818488522
FV2	foraging	visible	foragingvisible	90							18	18	a1	b1	3150	555	1	0	1	0	18		18	1		33.13608305	2.366863075
FV2	foraging	visible	foragingvisible	100							18	18	a1	b1	3147	561	1	0	1	0	18		18	1		6.708203932	0.479157424
FV2	foraging	visible	foragingvisible	110							18	18	a	b1	3150	558	1	0	1	0	18		18	1		4.242640687	0.303045763
FV2	foraging	visible	foragingvisible	120						-1	18	18	a1	b1	3127.586182	556.1953125	1	1	1	0	18		18	1		22.4863544	1.606168172
FV2	foraging	visible	foragingvisible	130		3					18	18	a	b1	3144	558	1	0	1	0	18		18	1		16.51273201	1.179480858
FV2	foraging	visible	foragingvisible	140							18	18	a1	b1	3147	555	1	0	1	0	18		18	1		4.242640687	0.303045763
FV2	foraging	visible	foragingvisible	150							18	18	a	b1	3141	549	1	0	1	0	18		18	1		8.485281374	0.606091527
FV2	foraging	visible	foragingvisible	160							18	18	a	b1	3150	546	1	0	1	0	18		18	1		9.486832981	0.677630927
FV2	foraging	visible	foragingvisible	170							18	18	a	b1	3148	546	1	0	1	0	18		18	1		2	0.142857143
FV2	foraging	visible	foragingvisible	180						-1	18	18	a1	b1	3129.168457	557.1194458	1	1	1	0	18		18	1		21.86936411	1.562097437
FV2	foraging	visible	foragingvisible	190						-1	18	18	a1	b1	3129.53125	556.4237671	1	1	1	0	18		18	1		0.784593917	0.056042423
FV2	foraging	visible	foragingvisible	200						-1	18	18	a1	b1	3129.767334	556.5681152	1	1	1	0	18		18	1		0.276716514	0.019765465
FV2	foraging	visible	foragingvisible	210						-1	18	18	a1	b1	3129.437256	556.5028687	1	1	1	0	18		18	1		0.336464845	0.024033203
FV2	foraging	visible	foragingvisible	220						-1	18	18	a1	b1	3129.48291	556.8286133	1	1	1	0	18		18	1		0.328928309	0.023494879
FV2	foraging	visible	foragingvisible	230						-1	18	18	a1	b1	3128.92627	557.0249023	1	1	1	0	18		18	1		0.59023509	0.042159649
FV2	foraging	visible	foragingvisible	240						-1	18	18	a1	b1	3129.007324	557.0449829	1	1	1	0	18		18	1		0.08350438	0.005964599
FV2	foraging	visible	foragingvisible	60				1			20	19	a2	b1	3159	441	1	0	0	0						0	0
FV2	foraging	visible	foragingvisible	70				1			19	19	a	b1	3165	453	1	0	1	0	19		19	1		13.41640786	0.958314847
FV2	foraging	visible	foragingvisible	80				1			19	19	a1	b1	3159	444	1	0	1	0	19		19	1		10.81665383	0.77261813
FV2	foraging	visible	foragingvisible	90				1			19	19	a	b1	3159	438	1	0	1	0	19		19	1		6	0.428571429
FV2	foraging	visible	foragingvisible	100				1			19	19	a	b1	3156	435	1	0	1	0	19		19	1		4.242640687	0.303045763
FV2	foraging	visible	foragingvisible	110				1			19	19	a1	b1	3165	444	1	0	1	0	19		19	1		12.72792206	0.90913729
FV2	foraging	visible	foragingvisible	120				1			19	19	a1	b1	3162	441	1	0	1	0	19		19	1		4.242640687	0.303045763
FV2	foraging	visible	foragingvisible	130				1			19	19	a1	b1	3156	450	1	0	1	0	19		19	1		10.81665383	0.77261813
FV2	foraging	visible	foragingvisible	140				1			19	19	a	b1	3162	450	1	0	1	0	19		19	1		6	0.428571429
FV2	foraging	visible	foragingvisible	150				1			19	19	a	b1	3165	444	1	0	1	0	19		19	1		6.708203932	0.479157424
FV2	foraging	visible	foragingvisible	160				1			19	19	a	b1	3162	441	1	0	1	0	19		19	1		4.242640687	0.303045763
FV2	foraging	visible	foragingvisible	170				1			19	19	a	b1	3162	447	1	0	1	0	19		19	1		6	0.428571429
FV2	foraging	visible	foragingvisible	180				1			19	19	a	b1	3162	444	1	0	1	0	19		19	1		3	0.214285714
FV2	foraging	visible	foragingvisible	190				1			19	19	a1	b1	3159	441	1	0	1	0	19		19	1		4.242640687	0.303045763
FV2	foraging	visible	foragingvisible	200				1			19	19	a	b1	3165	453	1	0	1	0	19		19	1		13.41640786	0.958314847
FV2	foraging	visible	foragingvisible	210				1			19	19	a	b1	3162	444	1	0	1	0	19		19	1		9.486832981	0.677630927
FV2	foraging	visible	foragingvisible	220				1			19	19	a	b1	3162	447	1	0	1	0	19		19	1		3	0.214285714
FV2	foraging	visible	foragingvisible	230				1			19	19	a	b1	3162	456	1	0	1	0	19		19	1		9	0.642857143
FV2	foraging	visible	foragingvisible	240				1			19	19	a	b1	3156	450	1	0	1	0	19		19	1		8.485281374	0.606091527
FV3	foraging	visible	foragingvisible	60						-1	0	0	a1	b	3103.564453	1231.132446	1	1	1	0	0		0	1		0	0
FV3	foraging	visible	foragingvisible	70						-1	0	0	a1	b	3112.535889	1659.6698	1	1	1	0	0		0	1		428.6312523	30.61651802
FV3	foraging	visible	foragingvisible	80						-1	0	0	a	b	3144.443115	1866.700195	1	1	1	0	0		0	1		209.4747133	14.96247952
FV3	foraging	visible	foragingvisible	90						-1	0	0	a	b1	3065.430176	1961.959229	1	1	1	0	0		0	1		123.7631936	8.840228114
FV3	foraging	visible	foragingvisible	100						-1	20	0	a2	b2	3032.889404	1997.898804	1	1	0	0						48.48252153	3.463037252
FV3	foraging	visible	foragingvisible	110				1	c1		20	0	a	b2	2996	2013	1	0	0	0						39.86068549	2.847191821
FV3	foraging	visible	foragingvisible	120					c5	-1	20	0	a2	b	2825.528809	1950.731689	1	1	0	0						181.4876566	12.96340405
FV3	foraging	visible	foragingvisible	130						-1	20	0	a2	b1	2440.993408	1949.654785	1	1	0	0						384.5369089	27.46692207
FV3	foraging	visible	foragingvisible	140					c5	-1	20	0	a	b	2054.642334	1968.491943	1	1	0	0						386.8100191	27.62928708
FV3	foraging	visible	foragingvisible	150					c5	-1	20	0	a2	b	1612.901489	1967.341187	1	1	0	0						441.7423439	31.55302456
FV3	foraging	visible	foragingvisible	160					c5	-1	20	0	a2	b2	1263.912964	1970.114624	1	1	0	0						348.9995452	24.92853894
FV3	foraging	visible	foragingvisible	170						-1	0	0	a	b	1035.321289	1995.815063	1	1	1	0	0		0	1		230.0318814	16.43084867
FV3	foraging	visible	foragingvisible	180						-1	0	0	a	b	902.2609863	1984.368896	1	1	1	0	0		0	1		133.5517087	9.539407763
FV3	foraging	visible	foragingvisible	190						-1	0	0	a1	b	917.2880859	1951.071167	1	1	1	0	0		0	1		36.53152719	2.609394799
FV3	foraging	visible	foragingvisible	200					c5	-1	20	0	a2	b2	883.1685181	1674.908569	1	1	0	0						278.2623321	19.87588086
FV3	foraging	visible	foragingvisible	210						-1	0	0	a	b1	866.7045288	1505.065552	1	1	1	0	0		0	1		170.639132	12.18850943
FV3	foraging	visible	foragingvisible	220						0	20	0	a2	b	862.7365723	1311.299683	1	1	0	0		0			1	193.8064928	13.84332092
FV3	foraging	visible	foragingvisible	230						0	0	0	a1	b	994.5350342	885.1676025	1	1	1	0	0	0	0	1	1	446.0486348	31.86061677
FV3	foraging	visible	foragingvisible	240					c5	4	20	0	a2	b	1261.218262	753.8744507	1	1	0	1		4	0	0	0	297.2504595	21.23217568
FV3	foraging	visible	foragingvisible	190					c5	-1	20	1	a2	b2	1078.831299	421.1779785	1	1	0	0						379.4099984	27.10071417
FV3	foraging	visible	foragingvisible	60						-1	20	2	a1	b	874.1060181	868.0117798	1	1	0	0						0	0
FV3	foraging	visible	foragingvisible	70						-1	20	2	a2	b	883.4628296	1188.021362	1	1	0	0						320.1463456	22.86759612
FV3	foraging	visible	foragingvisible	80						-1	2	2	a1	b1	855.1957397	1220.962402	1	1	1	0	2		2	1		43.40668713	3.100477652
FV3	foraging	visible	foragingvisible	90						-1	2	2	a	b	882.8070679	1226.982544	1	1	1	0	2		2	1		28.2599992	2.018571371
FV3	foraging	visible	foragingvisible	100					c5	-1	20	2	a2	b	902.6185303	1398.970703	1	1	0	0						173.1254484	12.36610346
FV3	foraging	visible	foragingvisible	110					c5	-1	20	2	a2	b	875.9942017	1712.226074	1	1	0	0						314.384768	22.45605486
FV3	foraging	visible	foragingvisible	120					c5	-1	20	2	a2	b	925.8569946	1937.537964	1	1	0	0						230.7633981	16.48309986
FV3	foraging	visible	foragingvisible	130					c5	-1	20	2	a2	b	1177.317383	1972.563599	1	1	0	0						253.8880108	18.13485792
FV3	foraging	visible	foragingvisible	140						-1	2	2	a	b1	1393.656616	1981.664429	1	1	1	0	2		2	1		216.5305725	15.46646947
FV3	foraging	visible	foragingvisible	150						-1	20	2	a1	b	1195.237427	1967.146118	1	1	0	0						198.9496316	14.21068797
FV3	foraging	visible	foragingvisible	160						-1	2	2	a1	b	951.2709961	1964.044189	1	1	1	0	2		2	1		243.98615	17.42758214
FV3	foraging	visible	foragingvisible	170						-1	2	2	a1	b1	903.4396362	1940.354492	1	1	1	0	2		2	1		53.37640615	3.81260044
FV3	foraging	visible	foragingvisible	180					c5	-1	20	2	a2	b	887.3999634	1675.175049	1	1	0	0						265.6640888	18.97600634
FV3	foraging	visible	foragingvisible	190					c5	-1	20	2	a2	b	1094.292847	1678.098877	1	1	0	0						206.9135425	14.77953875
FV3	foraging	visible	foragingvisible	200					c5	-1	20	2	a2	b	1415.689453	1940.596436	1	1	0	0						414.9707783	29.64076988
FV3	foraging	visible	foragingvisible	210					c5	-1	20	2	a2	b	1782.316284	1928.010376	1	1	0	0						366.842803	26.20305736
FV3	foraging	visible	foragingvisible	220						-1	2	2	a	b	2142.693359	1944.857422	1	1	1	0	2		2	1		360.7706462	25.76933187
[truncated: 2,125 more rows]
